# Supplementary material
Source: publisher figshare collection journal article supplement (https://acs.figshare.com/ndownloader/files/22780433)
Supplement: Supplementary file 1 [file 22780433]

## SUPPORTING INFORMATION

### **Osmium- and Iridium-Promoted C-H Bond Activation of 2,2'- Bipyridines and Related Heterocycles: Kinetic and Thermodynamic Preferences**

Lara Cancela, Miguel A. Esteruelas,\* Ana M. López, Montserrat Oliván, Enrique Oñate, Ainhoa San-Torcuato, and Andrea Vélez

*Departamento de Química Inorgánica – Instituto de Síntesis Química y Catálisis Homogénea (ISQCH) –  
Centro de Innovación en Química Avanzada (ORFEO-CINQA), Universidad de Zaragoza – CSIC, 50009  
Zaragoza, Spain*

\* e-mail: maester@unizar.es

#### **Contents:**

---

|                                                                                             |     |
|---------------------------------------------------------------------------------------------|-----|
| - Experimental Details                                                                      | S2  |
| - Structural Analysis of Complexes <b>2</b> , <b>3</b> , <b>5</b> , <b>6</b> , and <b>7</b> | S3  |
| - NMR spectra                                                                               | S6  |
| - Deuteration Experiments                                                                   | S49 |
| - References                                                                                | S67 |

---

## • Experimental Details

**General Information.** All reactions were carried out with exclusion of air using Schlenk-tube techniques or in a drybox. Pentane and toluene were obtained oxygen- and water-free from an MBraun solvent purification apparatus, while methanol was dried and distilled under argon prior to use.  $^1\text{H}$ ,  $^{13}\text{C}\{^1\text{H}\}$ ,  $^{31}\text{P}\{^1\text{H}\}$ ,  $^2\text{H}$ , and  $^{19}\text{F}$  NMR spectra were recorded on Bruker 300 ARX, Bruker Avance 300 MHz, or Bruker Avance 400 MHz instruments. Chemical shifts (expressed in ppm) are referenced to residual solvent peaks ( $^1\text{H}$ ,  $^{13}\text{C}\{^1\text{H}\}$ ), external 85%  $\text{H}_3\text{PO}_4$  ( $^{31}\text{P}\{^1\text{H}\}$ ), or  $\text{CFCl}_3$  ( $^{19}\text{F}$ ). Coupling constants  $J$  and  $N$  ( $N = J_{\text{P-H}} + J_{\text{P'-H}}$  for  $^1\text{H}$  and  $N = J_{\text{P-C}} + J_{\text{P'-C}}$  for  $^{13}\text{C}\{^1\text{H}\}$ ) are given in hertz. Attenuated total reflection infrared spectra (ATR-IR) of solid samples were run on a PerkinElmer Spectrum 100 FT-IR spectrometer. Elemental analyses were carried out in a PerkinElmer 2400 CHNS/O analyzer. High-resolution electrospray mass spectra were acquired using a MicroTOF-Q hybrid quadrupole time-of-flight spectrometer (Bruker Daltonics, Bremen, Germany).  $\text{OsH}_6(\text{P}^i\text{Pr}_3)_2$ ,<sup>1</sup>  $\text{OsH}_2\text{Cl}_2(\text{P}^i\text{Pr}_3)_2$ ,<sup>1</sup>  $\text{IrH}_5(\text{P}^i\text{Pr}_3)_2$ ,<sup>2</sup>  $\text{IrCl}_2\text{H}(\text{P}^i\text{Pr}_3)_2$ ,<sup>2</sup> 6-phenyl-2,2'-bipyridine,<sup>3</sup> 6-methyl-2,2'-bipyridine,<sup>4</sup> 3-methyl-1-(6-phenylpyridin-2-yl)-1*H*-benzimidazolium iodide,<sup>5</sup> and 3-methyl-1-(6-phenylpyridin-2-yl)-1*H*-imidazolium iodide<sup>5</sup> were prepared as reported previously.

**Reaction of 3-methyl-1-(6-phenylpyridin-2-yl)-1*H*-benzimidazolium Iodide with Silver Tetrafluoroborate: Anion Exchange.** A solution of 3-methyl-1-(6-phenylpyridin-2-yl)-1*H*-benzimidazolium iodide (600 mg, 145 mmol) in MeCN: MeOH (15:15 mL) was treated with  $\text{AgBF}_4$  (342 mg, 170 mmol). The resulting mixture was stirred in the dark for 10 min, obtaining a colorless solution and a white-yellow solid. The solution was filter through Celite, and it was concentrated to approx. 0.5 mL. Addition of acetone affords a white solid. Yield: 480 mg (89 %).  $^1\text{H}$  NMR (300.13 MHz,  $\text{CD}_2\text{Cl}_2$ , 298 K):  $\delta$  10.0 (s, 1H, NCHN), 8.58 (m, 1H, CH Ar), 8.18 (t,  $^3J_{\text{H-H}} = 7.9$ , 1H, CH Ar), 8.12 (m, 2H, CH Ar), 8.02 (d,  $^3J_{\text{H-H}} = 7.5$ , 1H, CH Ar), 7.94 (d,  $^3J_{\text{H-H}} = 7.9$ , 1H, CH Ar), 7.84 (m, 1H, CH Ar), 7.80 (m, 2H, CH Ar), 7.54 (m, 3H, CH Ar) 4.34 (s, 3H,  $\text{CH}_3$ ).  $^{13}\text{C}\{^1\text{H}\}$  (75.48 MHz,  $\text{CD}_2\text{Cl}_2$ , 298 K):  $\delta$  158.2, 147.6 (both s, C Ar), 144.94 (s, NCHN, inferred from the HSQC spectrum), 141.9 (s, CH Ar), 137.6, 132.9 (both s, C Ar), 130.7 (s, CH Ar), 130.6 (s, C Ar), 129.5, 128.8, 128.4, 127.4, 121.9, 116.9, 115.2, 113.3 (all s, CH ar), 34.4 (s,  $\text{CH}_3$ ).

**Reaction of 3-Methyl-1-(6-phenylpyridin-2-yl)-1*H*-imidazolium Iodide with Silver Tetrafluoroborate: Anion Exchange.** A solution of 3-methyl-1-(6-phenylpyridin-2-yl)-1*H*-imidazolium iodide (600 mg, 165 mmol) in MeCN:MeOH (15:15 mL) was treated with AgBF<sub>4</sub> (389 mg, 198 mmol). The resulting mixture was stirred in the dark for 10 min, obtaining a colorless solution and a white-yellow solid. The solution was filter through Celite, and it was concentrated to approx. 0.5 mL addition of acetone affords a white solid. Yield: 485 mg (91%). <sup>1</sup>H NMR (300.13 MHz, DMSO-*d*<sub>6</sub>, 298K): δ 10.14 (s, 1H, NCHN), 8.60 (br, 1H, CH Im), 8.26 (m, 3H, CH Ar), 8.20 (m, 1H, CH Ar), 7.97 (br, 1H, CH Im), 7.93 (m, 2H, CH Ar), 7.55 (m, 3H, CH Ar), 4.01 (s, 3H, CH<sub>3</sub>). <sup>13</sup>C{<sup>1</sup>H} (75.48 MHz, DMSO-*d*<sub>6</sub>, 298 K): δ 155.7, 146.1 (both s, C Ar), 141.6 (s, CH, Ar), 136.4 (s, C Ar), 135.5 (s, NCHN), 130.2, 128.9, 126.9 (all s, CH Ar), 124.8 (s, CH Im), 120.9 (s, CH Ar), 119.0 (s, CH Im), 112.2 (s, CH Ar), 36.3 (s, CH<sub>3</sub>).

#### • Structural Analysis of Complexes 2, 3, 5, 6, and 7.

X-ray data were collected for the complexes on a Bruker Smart APEX or Bruker Smart APEX DUO CCD diffractometers equipped with a normal focus, and 2.4 kW sealed tube source (Mo radiation,  $\lambda = 0.71073$  Å). Data were collected over the complete sphere covering 0.3° in  $\omega$ . Data were corrected for absorption by using a multiscan method applied with the SADABS program.<sup>6</sup> The structures were solved by Patterson or direct methods and refined by full-matrix least squares on  $F^2$  with SHELXL2016,<sup>7</sup> including isotropic and subsequently anisotropic displacement parameters. The hydrogen atoms were observed in the last Fourier Maps or calculated, and refined freely or using a restricted riding model. The hydrides were refined with a fixed distance Os-H.

For **2**, the osmium atom is located on a binary symmetry axis which divides the asymmetric C,N-bipyridine coordinated ligand into two moieties related by symmetry. Because of that, there is a positional disorder between the 2/6 and 2'/6' locations of nitrogen/carbon atoms of the C,N-coordinated bipyridine ligand refined with occupancy of 50% each with the aid of the EXYZ and EADP options of SHELXL. For **3-6** the disordered groups were refined with different moieties, complementary occupancy factors, restrained geometries, and isotropic displacement factors.

Crystal data for **2** (CCDC 1987592): C<sub>28</sub>H<sub>52</sub>N<sub>2</sub>OsP<sub>2</sub>, M<sub>w</sub> 668.85, orange, irregular block (0.143 x 0.100 x 0.046 mm<sup>3</sup>), orthorhombic, space group Pbcn, *a*: 8.5429(5) Å, *b*: 18.7702(12) Å, *c*: 17.9964(11) Å, *V* = 2885.8(3) Å<sup>3</sup>, *Z* = 4, *Z'* = 0.5, D<sub>calc</sub>: 1.540 g cm<sup>-3</sup>, F(000): 1360, T = 100(2) K, μ = 4.548 mm<sup>-1</sup>. 48084 measured reflections (2θ: 3-57°, ω scans 0.3°), 3642 unique (R<sub>int</sub> = 0.0366); min./max. transm. factors 0.670/0.862. Final agreement factors were R<sup>1</sup> = 0.0189 (2955 observed reflections, I > 2σ(I)) and wR<sup>2</sup> = 0.0464; data/restraints/parameters 3642/2/160; GoF = 1.021. Largest peak and hole: 1.285 (close to osmium atoms) and -0.668 e/ Å<sup>3</sup>.

Crystal data for **3** (CCDC 1987590): C<sub>34</sub>H<sub>56</sub>N<sub>2</sub>OsP<sub>2</sub>, M<sub>w</sub> 744.94, orange, irregular block (0.142 x 0.127 x 0.055 mm<sup>3</sup>), triclinic, space group P-1, *a*: 8.9477(5) Å, *b*: 12.8386(7) Å, *c*: 15.3127(9) Å, α: 83.7190(10)°, β: 74.8350(10)°, γ: 79.0300(10)°, *V* = 1663.48(16) Å<sup>3</sup>, *Z* = 2, *Z'* = 1, D<sub>calc</sub>: 1.487 g cm<sup>-3</sup>, F(000): 760, T = 100(2) K, μ = 3.954 mm<sup>-1</sup>. 15961 measured reflections (2θ: 3-51°, ω scans 0.3°), 7735 unique (R<sub>int</sub> = 0.0209); min./max. transm. factors 0.640/0.862. Final agreement factors were R<sup>1</sup> = 0.0276 (6990 observed reflections, I > 2σ(I)) and wR<sup>2</sup> = 0.0659; data/restraints/parameters 7735/27/370; GoF = 1.061. Largest peak and hole 1.402 (close to osmium atoms) and -1.827 e/ Å<sup>3</sup>.

Crystal data for **5** (CCDC 1987594): C<sub>36</sub>H<sub>58</sub>N<sub>2</sub>OsP<sub>2</sub>, 1.5(C<sub>6</sub>H<sub>6</sub>), M<sub>w</sub> 888.14, orange, irregular block (0.231 x 0.210 x 0.118 mm<sup>3</sup>), monoclinic, space group P2<sub>1</sub>/n, *a*: 11.2086(10) Å, *b*: 20.6449(18) Å, *c*: 18.1317(15) Å, β: 99.7910(10)°, *V* = 4134.6(6) Å<sup>3</sup>, *Z* = 4, *Z'* = 1, D<sub>calc</sub>: 1.427 g cm<sup>-3</sup>, F(000): 1828, T = 100(2) K, μ = 3.194 mm<sup>-1</sup>. 76754 measured reflections (2θ: 3-57°, ω scans 0.3°), 11379 unique (R<sub>int</sub> = 0.0294); min./max. transm. factors 0.762/0.862. Final agreement factors were R<sup>1</sup> = 0.0198 (10195 observed reflections, I > 2σ(I)) and wR<sup>2</sup> = 0.0485; data/restraints/parameters 11379/4/ 448; GoF = 1.024. Largest peak and hole 0.939 (close to osmium atoms) and -0.564 e/ Å<sup>3</sup>.

Crystal data for **6** (CCDC 1987591): C<sub>37</sub>H<sub>59</sub>N<sub>3</sub>OsP<sub>2</sub>, M<sub>w</sub> 798.01, colorless, irregular block (0.143 x 0.098 x 0.093 mm<sup>3</sup>), triclinic, space group P-1, *a*: 12.7290(6) Å, *b*: 15.5400(8) Å, *c*: 18.4985(9) Å, α: 81.3860(10)°, β: 81.4380(10)°, γ: 82.3890(10)°, *V* = 3554.8(3) Å<sup>3</sup>, *Z* = 4, *Z'* = 2, D<sub>calc</sub>: 1.491 g cm<sup>-3</sup>, F(000): 1632, T = 100(2) K, μ = 3.707 mm<sup>-1</sup>. 56695 measured reflections (2θ: 3-57°, ω scans 0.3°), 17036 unique (R<sub>int</sub> =

0.0456); min./max. transm. factors 0.735/0.862. Final agreement factors were  $R^1 = 0.0307$  (13143 observed reflections,  $I > 2\sigma(I)$ ) and  $wR^2 = 0.0738$ ; data/restraints/parameters 17036/16/ 818; GoF = 0.951. Largest peak and hole 1.560 (close to osmium atoms) and -1.025e/ Å<sup>3</sup>.

Crystal data for **7** (CCDC 1987593): C<sub>33</sub>H<sub>56</sub>BF<sub>4</sub>N<sub>3</sub>OsP<sub>2</sub>, M<sub>w</sub> 833.75, yellow, irregular block (0.178 x 0.152 x 0.104 mm<sup>3</sup>), monoclinic, space group P2<sub>1</sub>/n,  $a$ : 11.1123(10) Å,  $b$ : 14.7336(14) Å,  $c$ : 22.192(2) Å,  $\beta$ : 102.3770(10)°,  $V = 3548.9(6)$  Å<sup>3</sup>,  $Z = 4$ ,  $Z' = 1$ ,  $D_{\text{calc}}$ : 1.560 g cm<sup>-3</sup>,  $F(000)$ : 1688,  $T = 100(2)$  K,  $\mu = 3.731$  mm<sup>-1</sup>. 47193 measured reflections ( $2\theta$ : 3-57°,  $\omega$  scans 0.3°), 9635 unique ( $R_{\text{int}} = 0.0372$ ); min./max. transm. factors 0.712/0.862. Final agreement factors were  $R^1 = 0.0228$  (8135 observed reflections,  $I > 2\sigma(I)$ ) and  $wR^2 = 0.0493$ ; data/restraints/parameters 9635/2/ 422; GoF = 1.028. Largest peak and hole 1.028 (close to osmium atoms) and -0.416 e/ Å<sup>3</sup>.

● NMR spectra

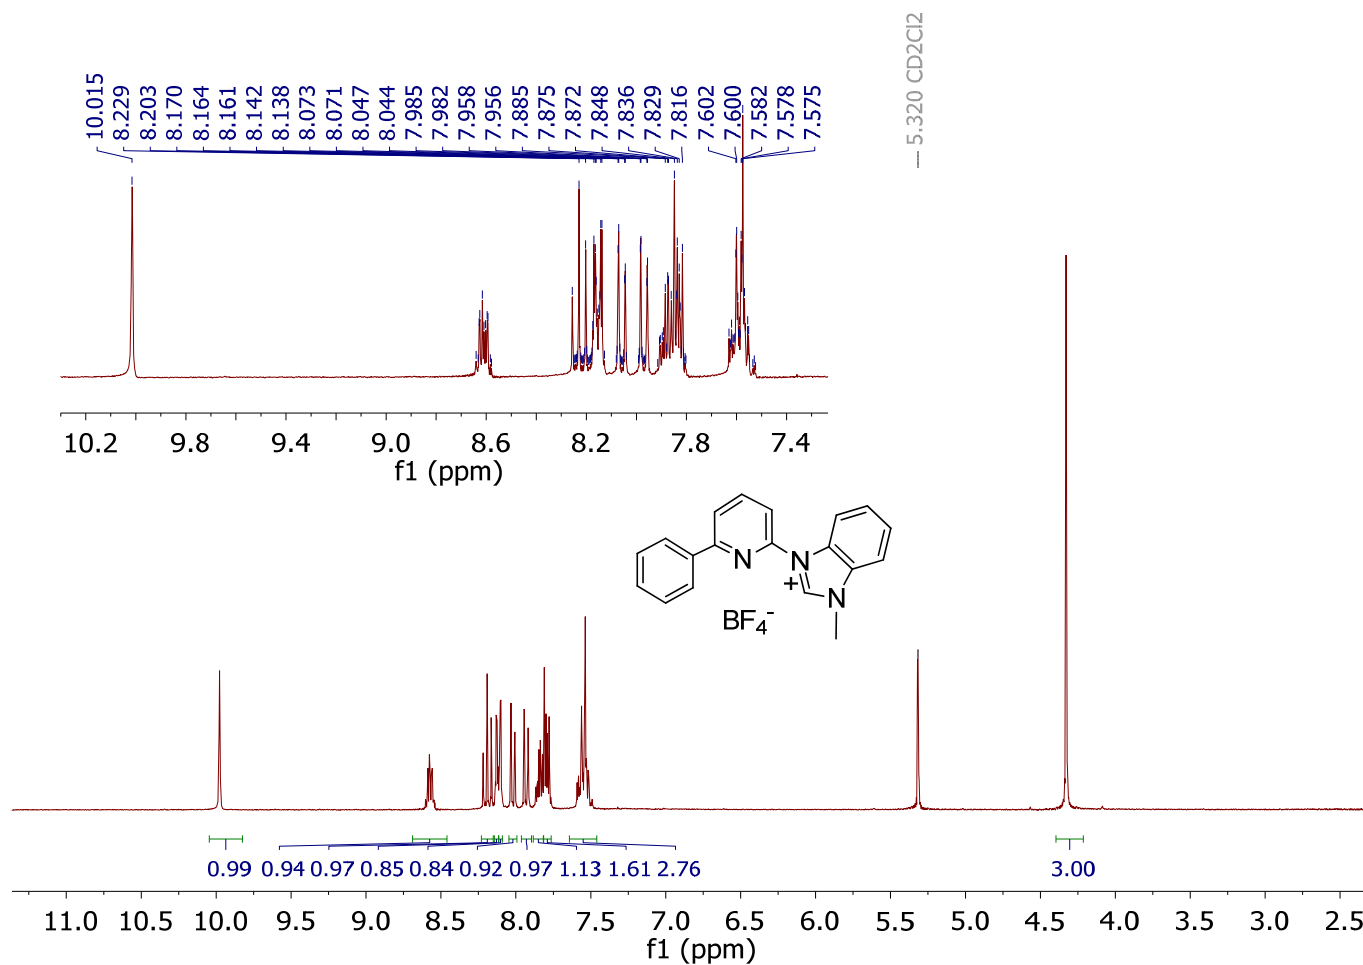

**Figure S1.** <sup>1</sup>H NMR spectrum (300.13 MHz CD<sub>2</sub>Cl<sub>2</sub>, 298 K) of 3-methyl-1-(6-phenylpyridin-2-yl)-1*H*-benzimidazolium tetrafluoroborate.

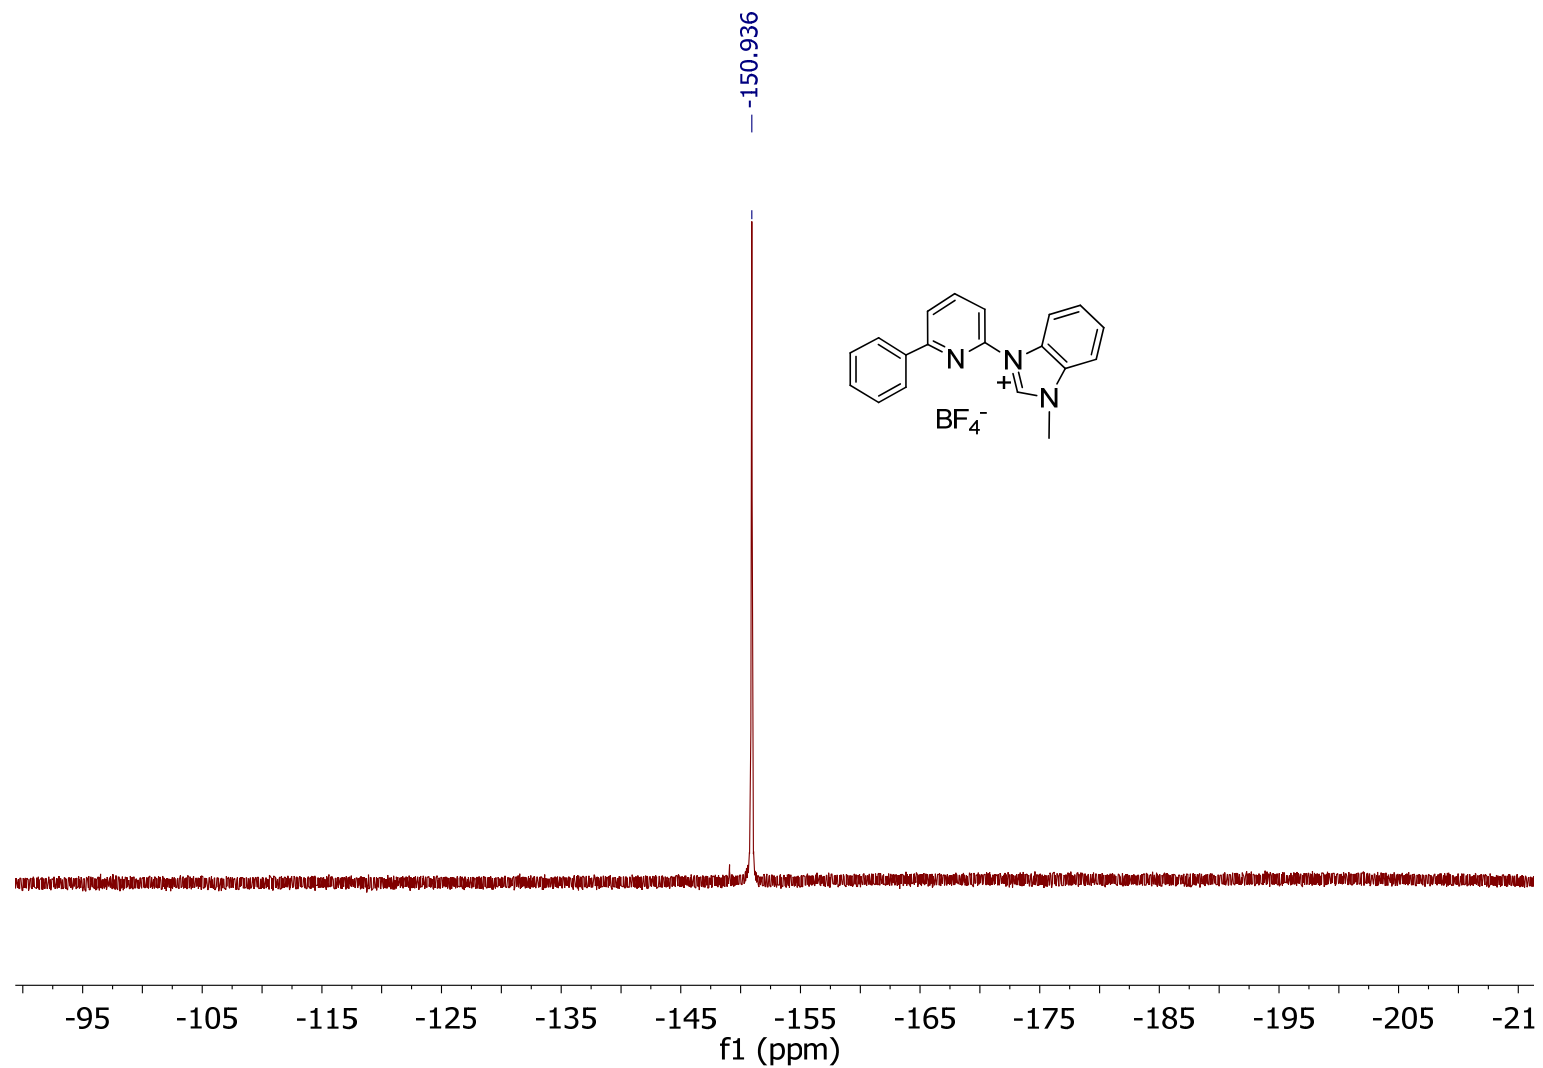

**Figure S2.**  $^{19}\text{F}\{^1\text{H}\}$ -NMR spectrum (376.49 MHz  $\text{CD}_2\text{Cl}_2$ , 298 K) of 3-methyl-1-(6-phenylpyridin-2-yl)-1*H*-benzimidazolium tetrafluoroborate.

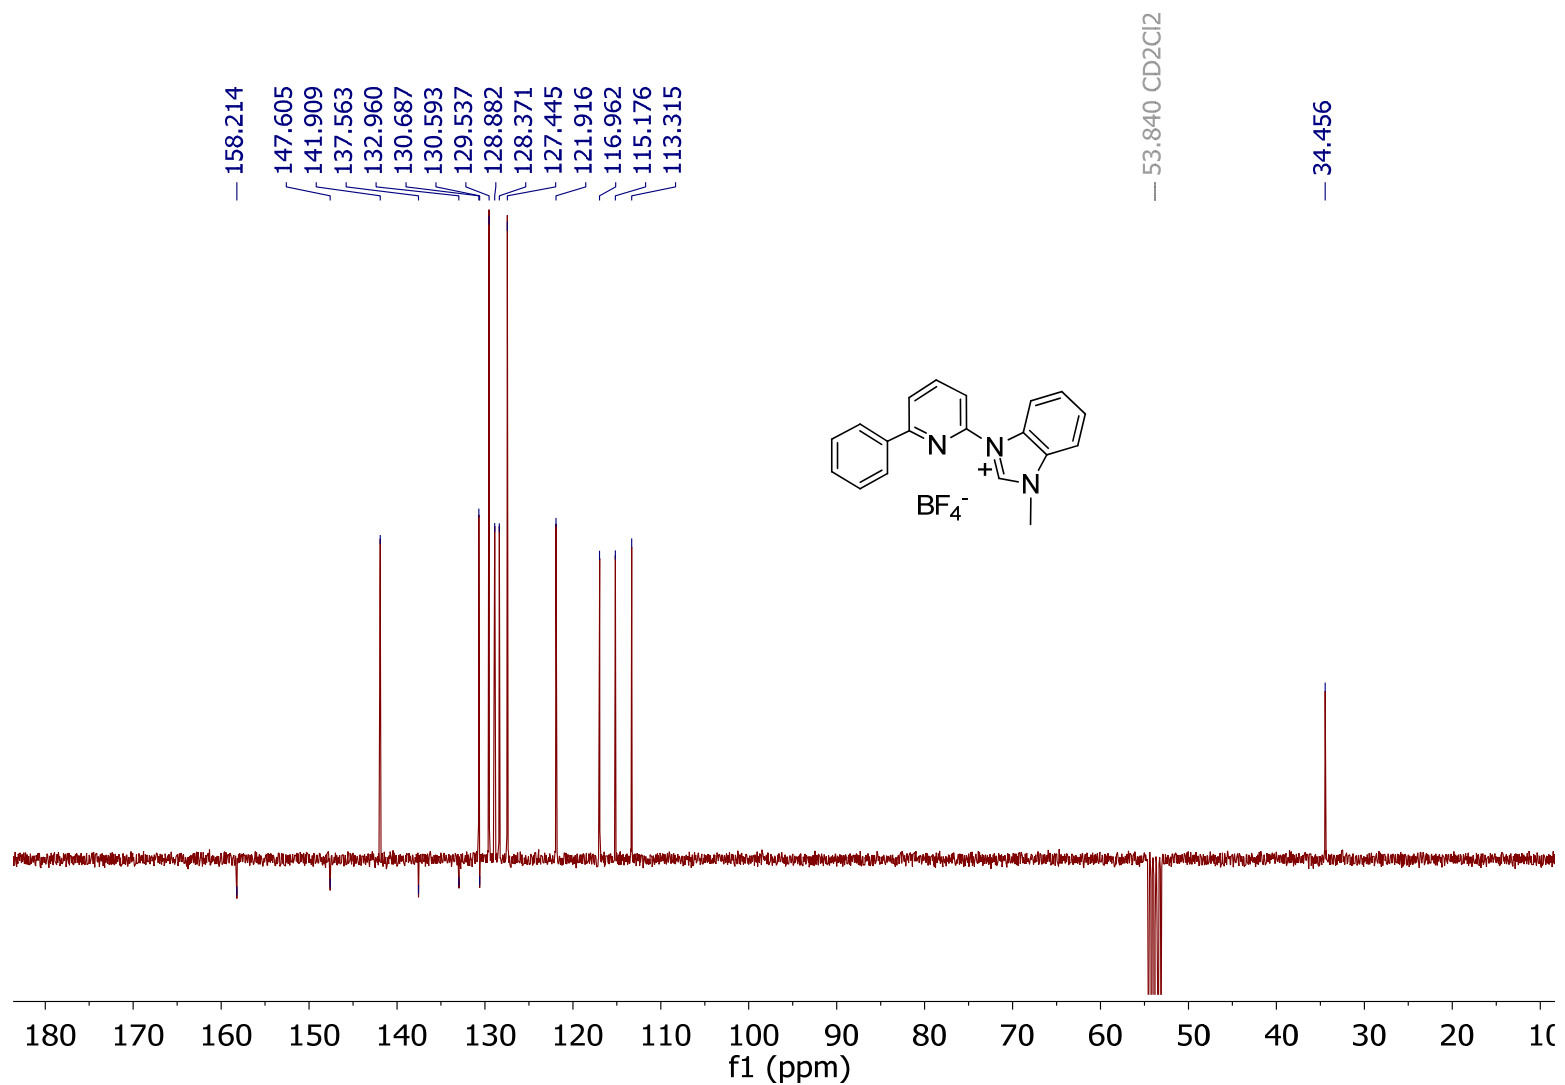

**Figure S3.**  $^{13}\text{C}\{^1\text{H}\}$ -apt NMR spectrum (75.48 MHz  $\text{CD}_2\text{Cl}_2$ , 298 K) of 3-methyl-1-(6-phenylpyridin-2-yl)-1H-benzimidazolium tetrafluoroborate.



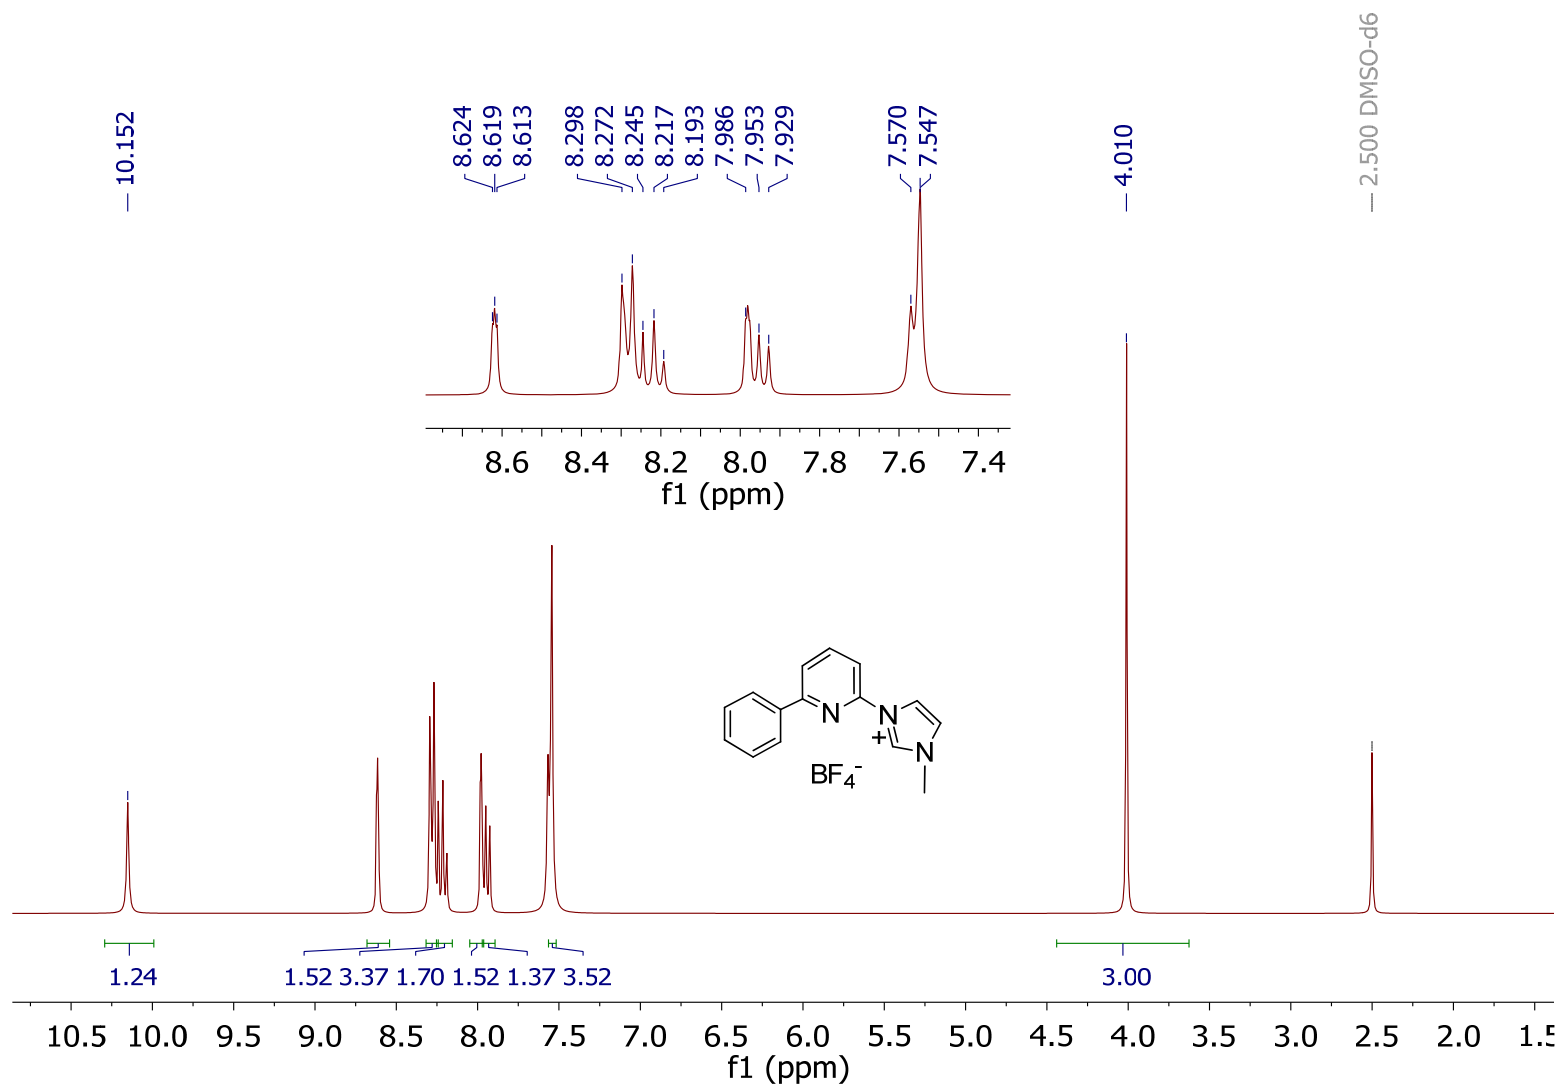

**Figure S4.**  $^1\text{H}$  NMR spectrum (300.13 MHz,  $\text{DMSO}-d_6$ , 298 K) of 3-methyl-1-(6-phenylpyridin-2-yl)-1*H*-Imidazolium tetrafluoroborate.

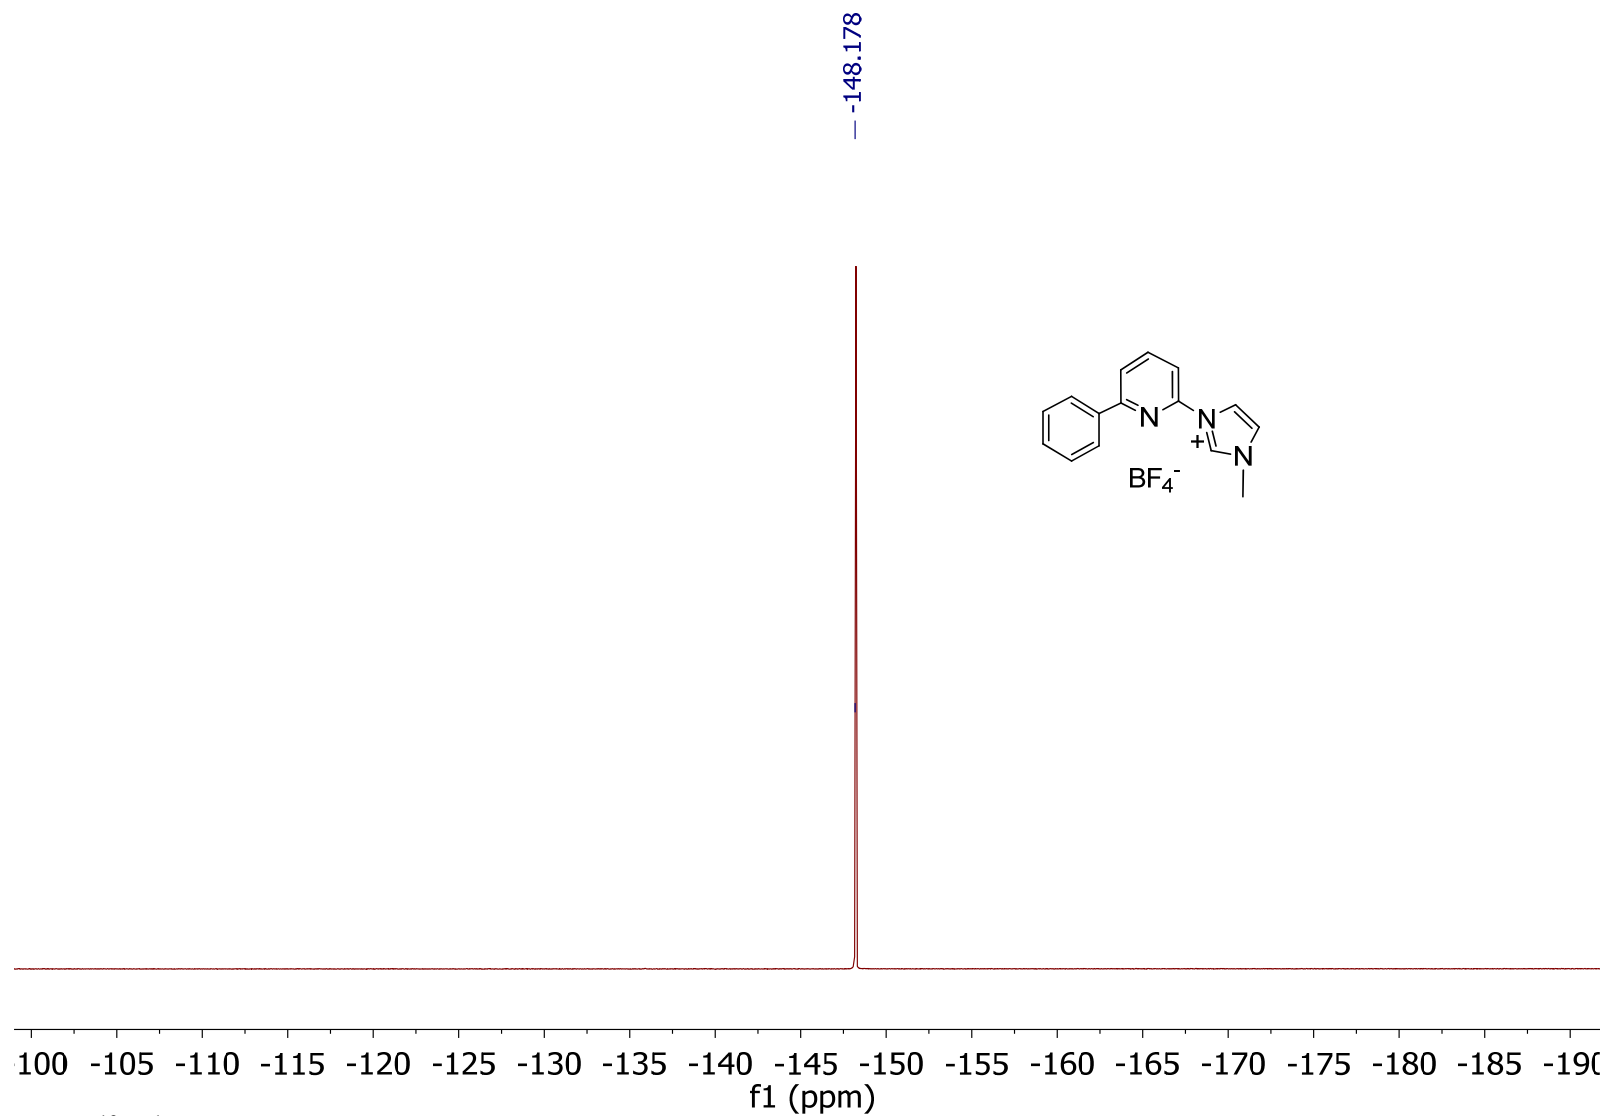

**Figure S5.**  $^{19}\text{F}\{^1\text{H}\}$  NMR spectrum (376.49 MHz DMSO- $d_6$ , 298 K) of 3-methyl-1-(6-phenylpyridin-2-yl)-1*H*-Imidazolium tetrafluoroborate.

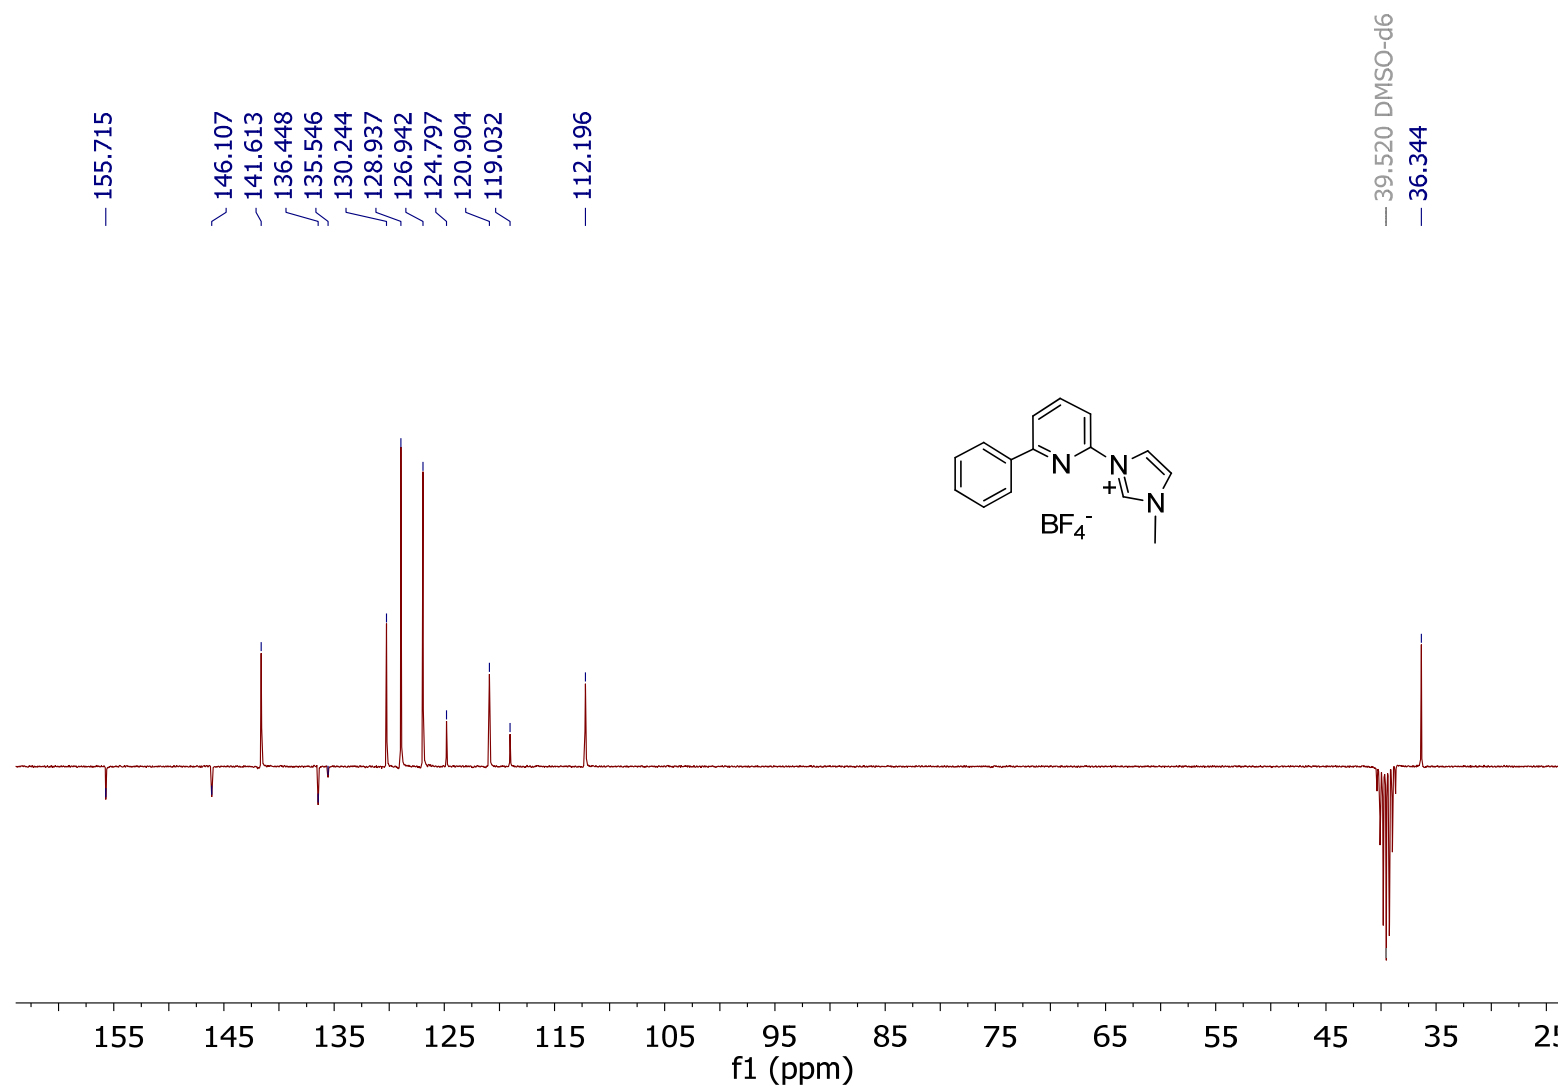

**Figure S6.** <sup>13</sup>C{<sup>1</sup>H}-apt NMR spectrum (75.48 MHz, DMSO-*d*<sub>6</sub>, 298 K) of 3-methyl-1-(6-phenylpyridin-2-yl)-1*H*-Imidazolium tetrafluoroborate

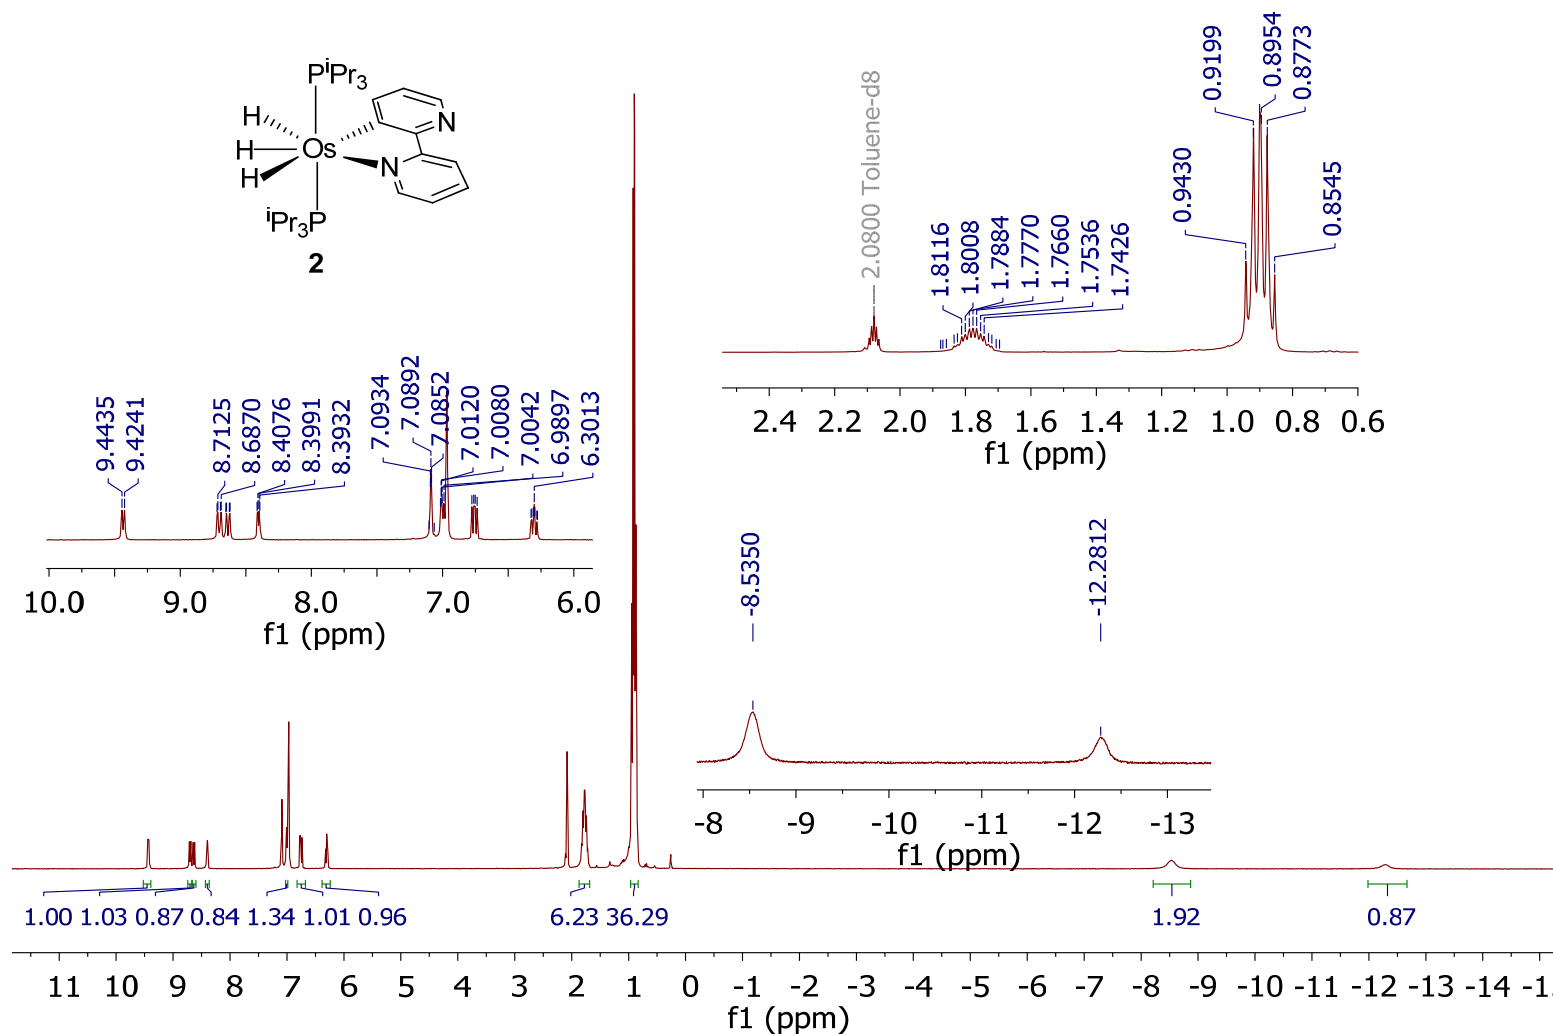

**Figure S7.**  $^1\text{H}$  NMR spectrum (300.13 MHz, toluene- $d_8$ , 298 K) of compound **2**.

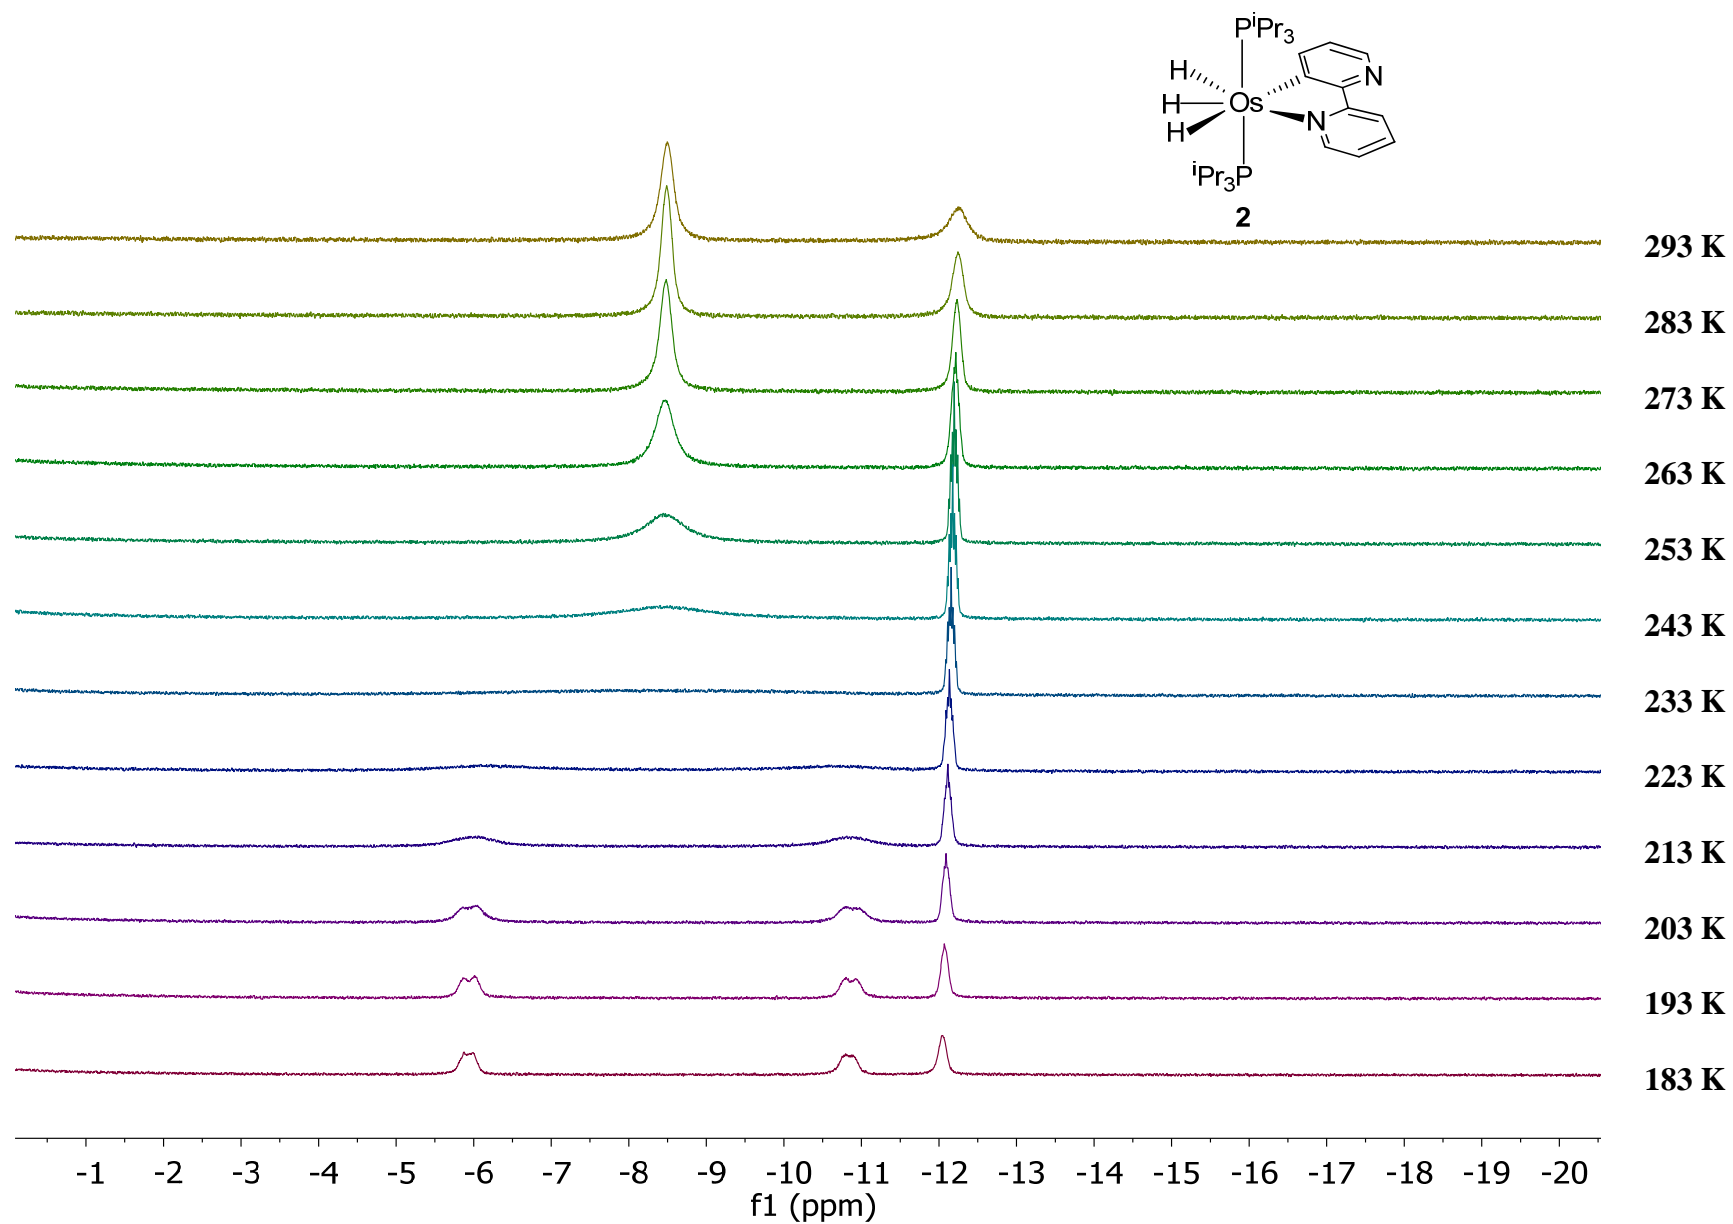

**Figure S8.** High field region of the <sup>1</sup>H NMR spectra (300.13 MHz, toluene-*d*<sub>8</sub>) of compound **2** as a function of the temperature.

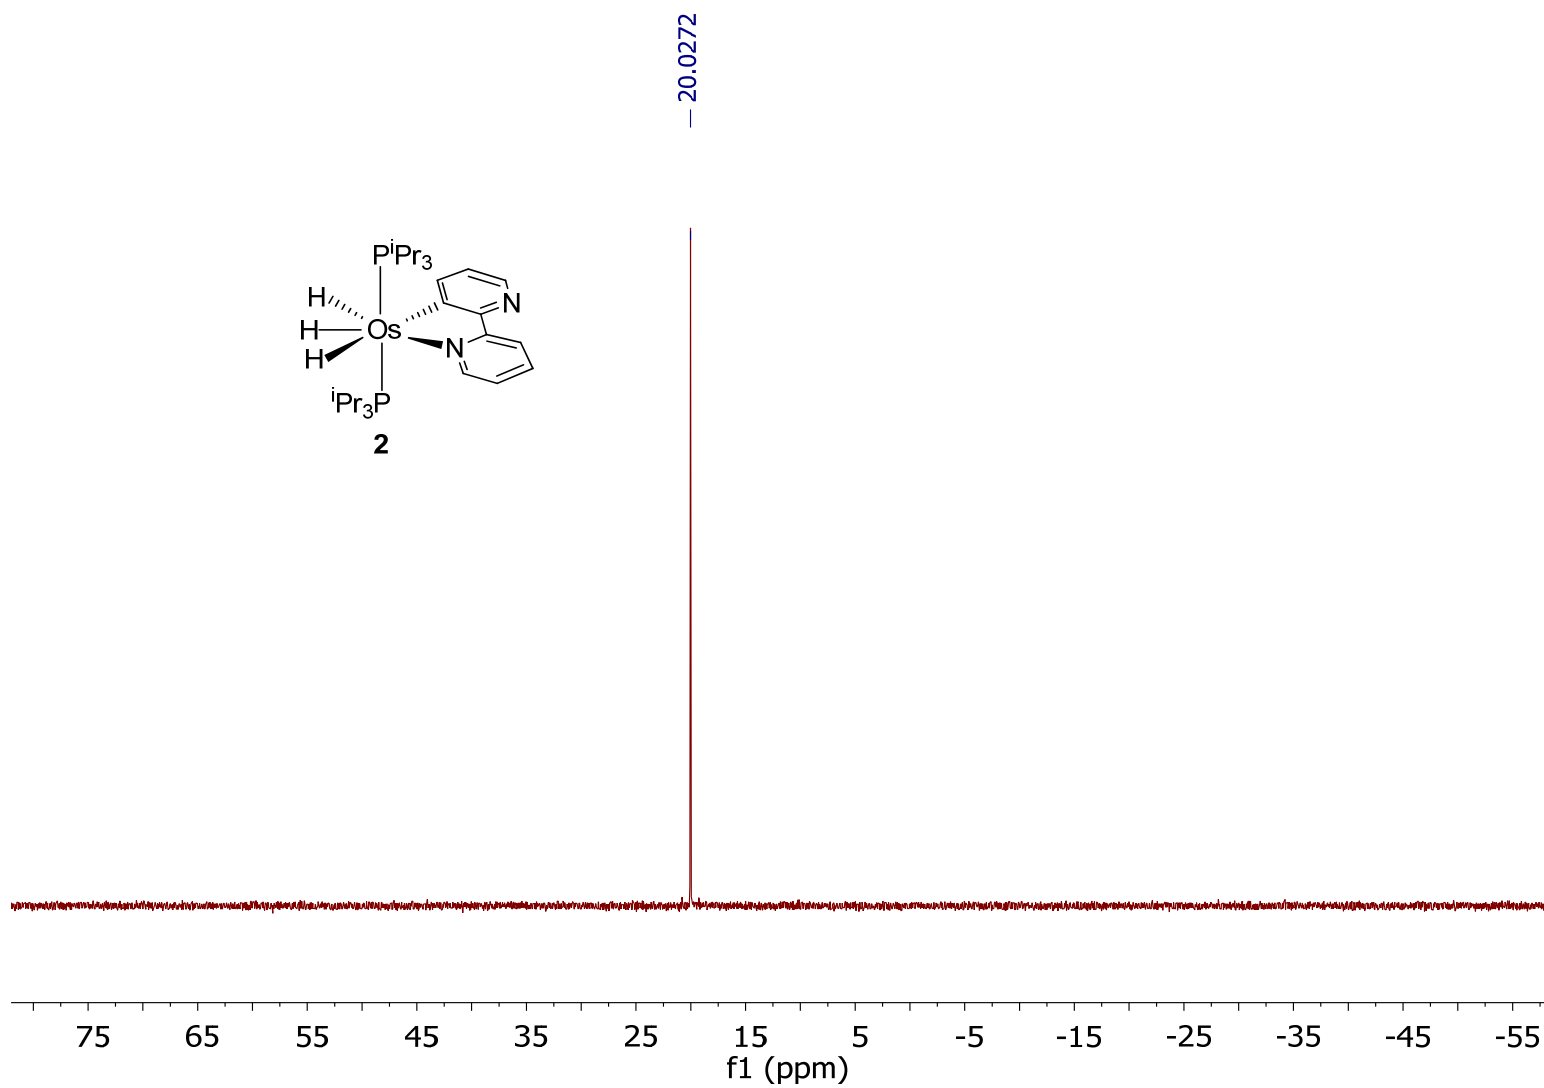

**Figure S9.**  $^{31}\text{P}\{^1\text{H}\}$  NMR spectrum (121.49 MHz, toluene- $d_8$ , 298 K) of compound **2**.

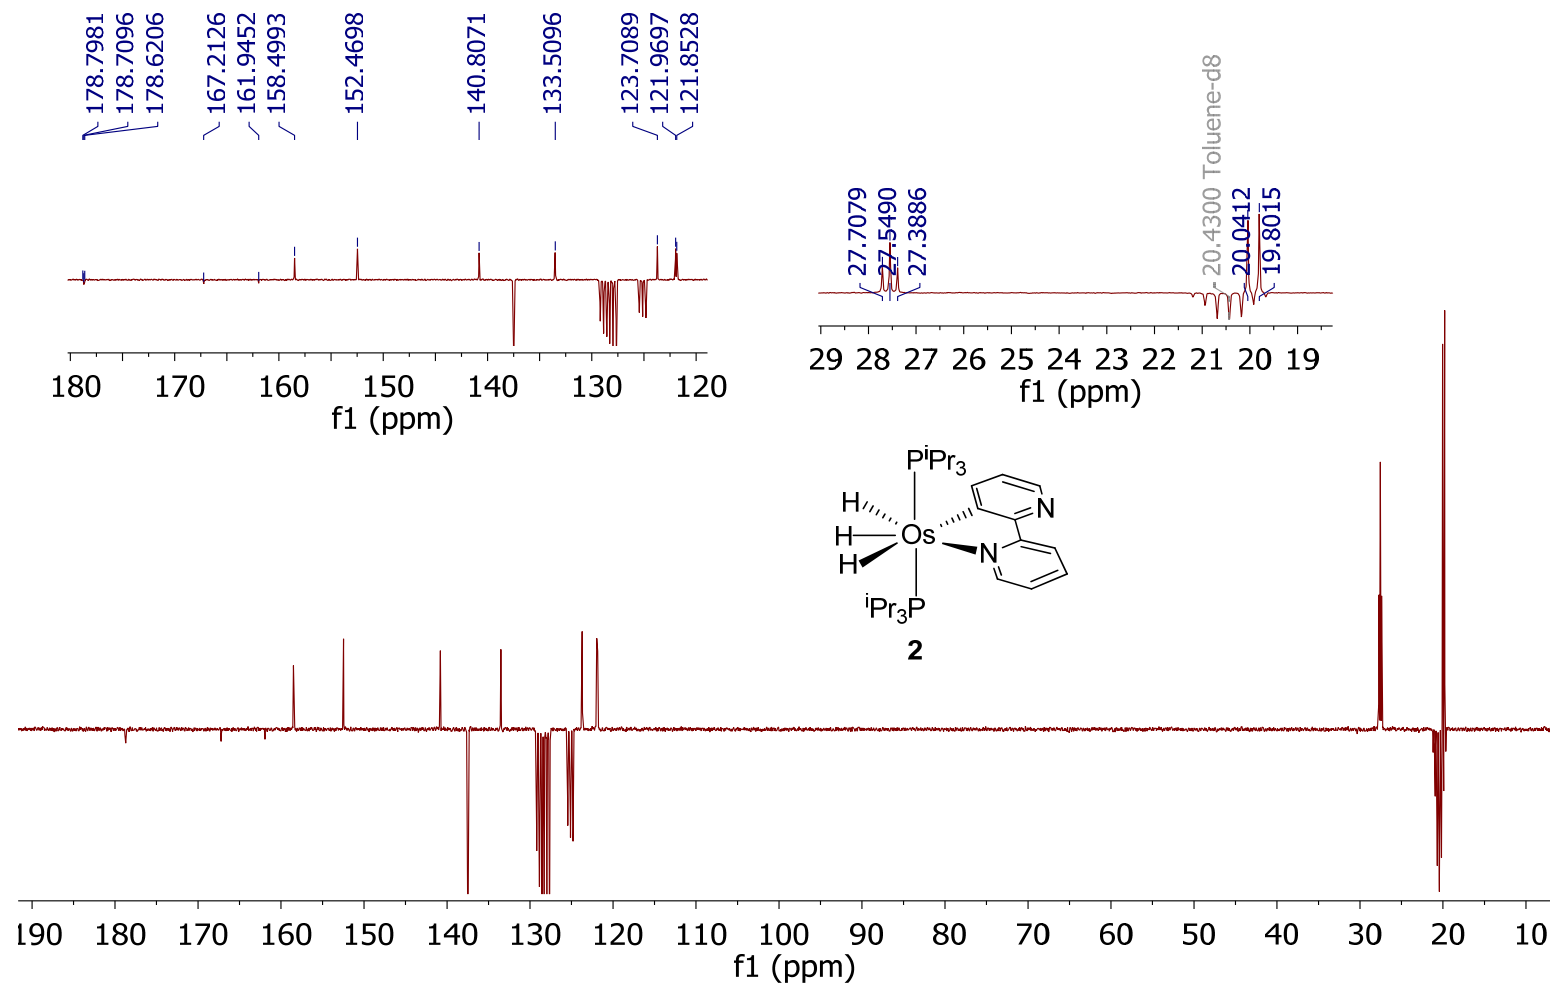

**Figure S10.**  $^{13}\text{C}\{^1\text{H}\}$ -apt NMR spectrum (75.48 MHz,  $\text{toluene-}d_8$ , 298 K) of compound **2**.

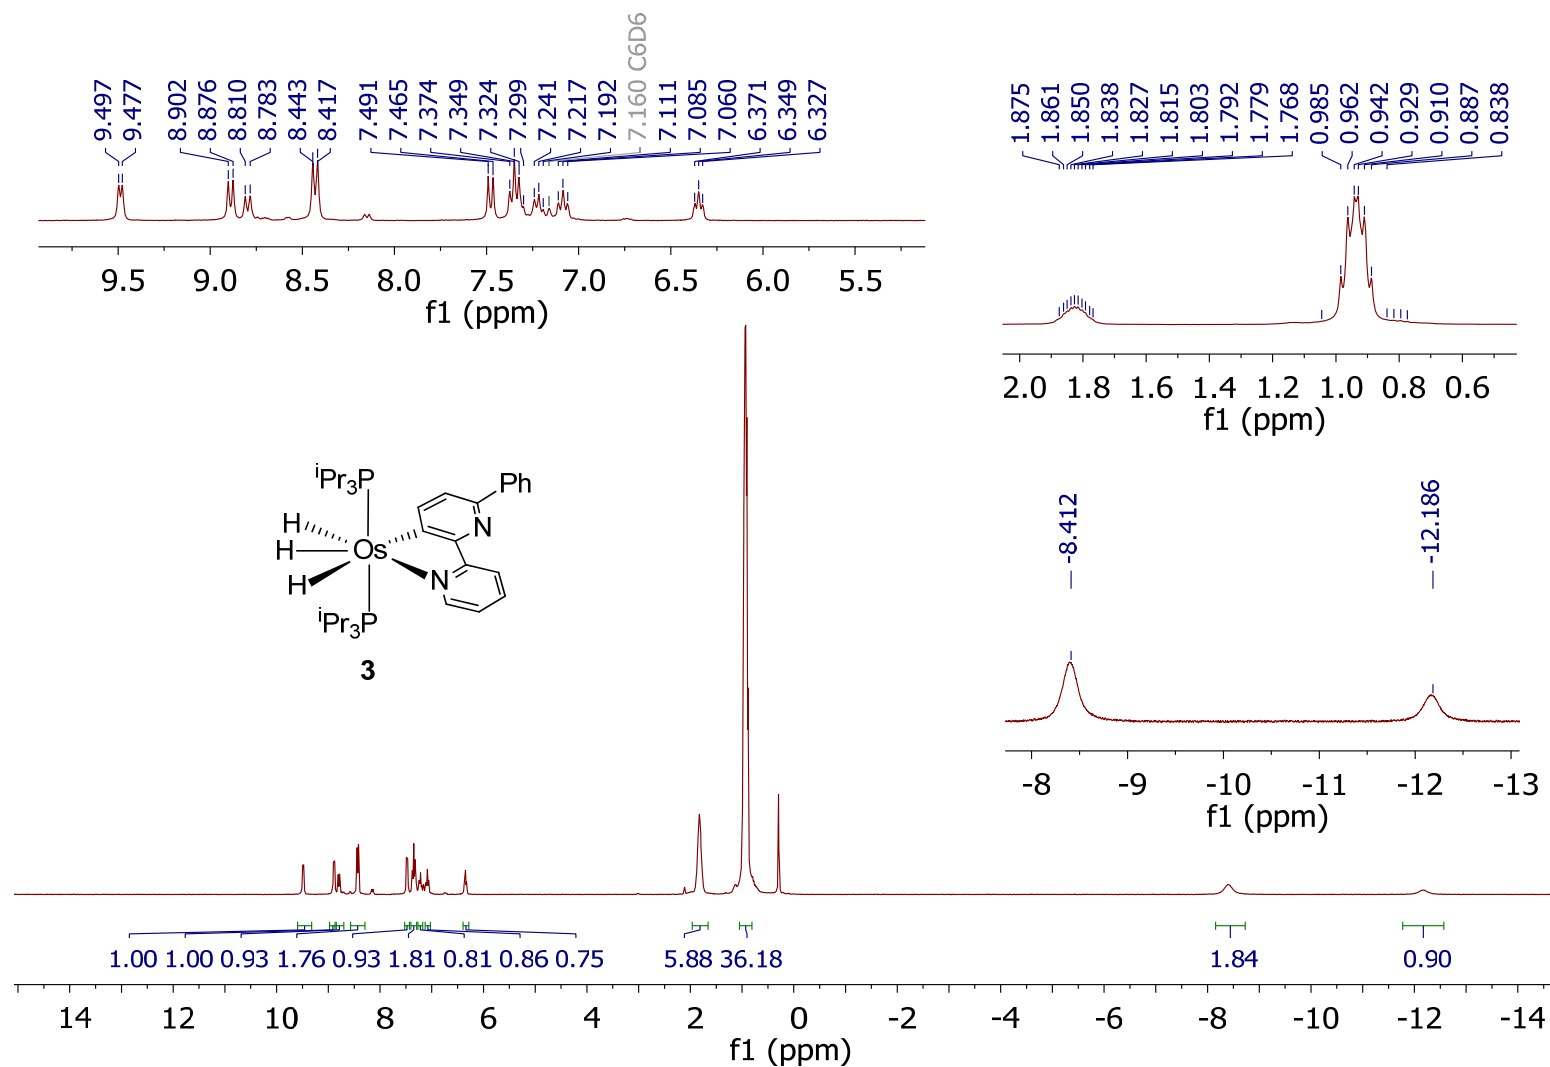

**Figure S11.** <sup>1</sup>H NMR spectrum (300.13 MHz, C<sub>6</sub>D<sub>6</sub>, 298 K) of compound **3**.



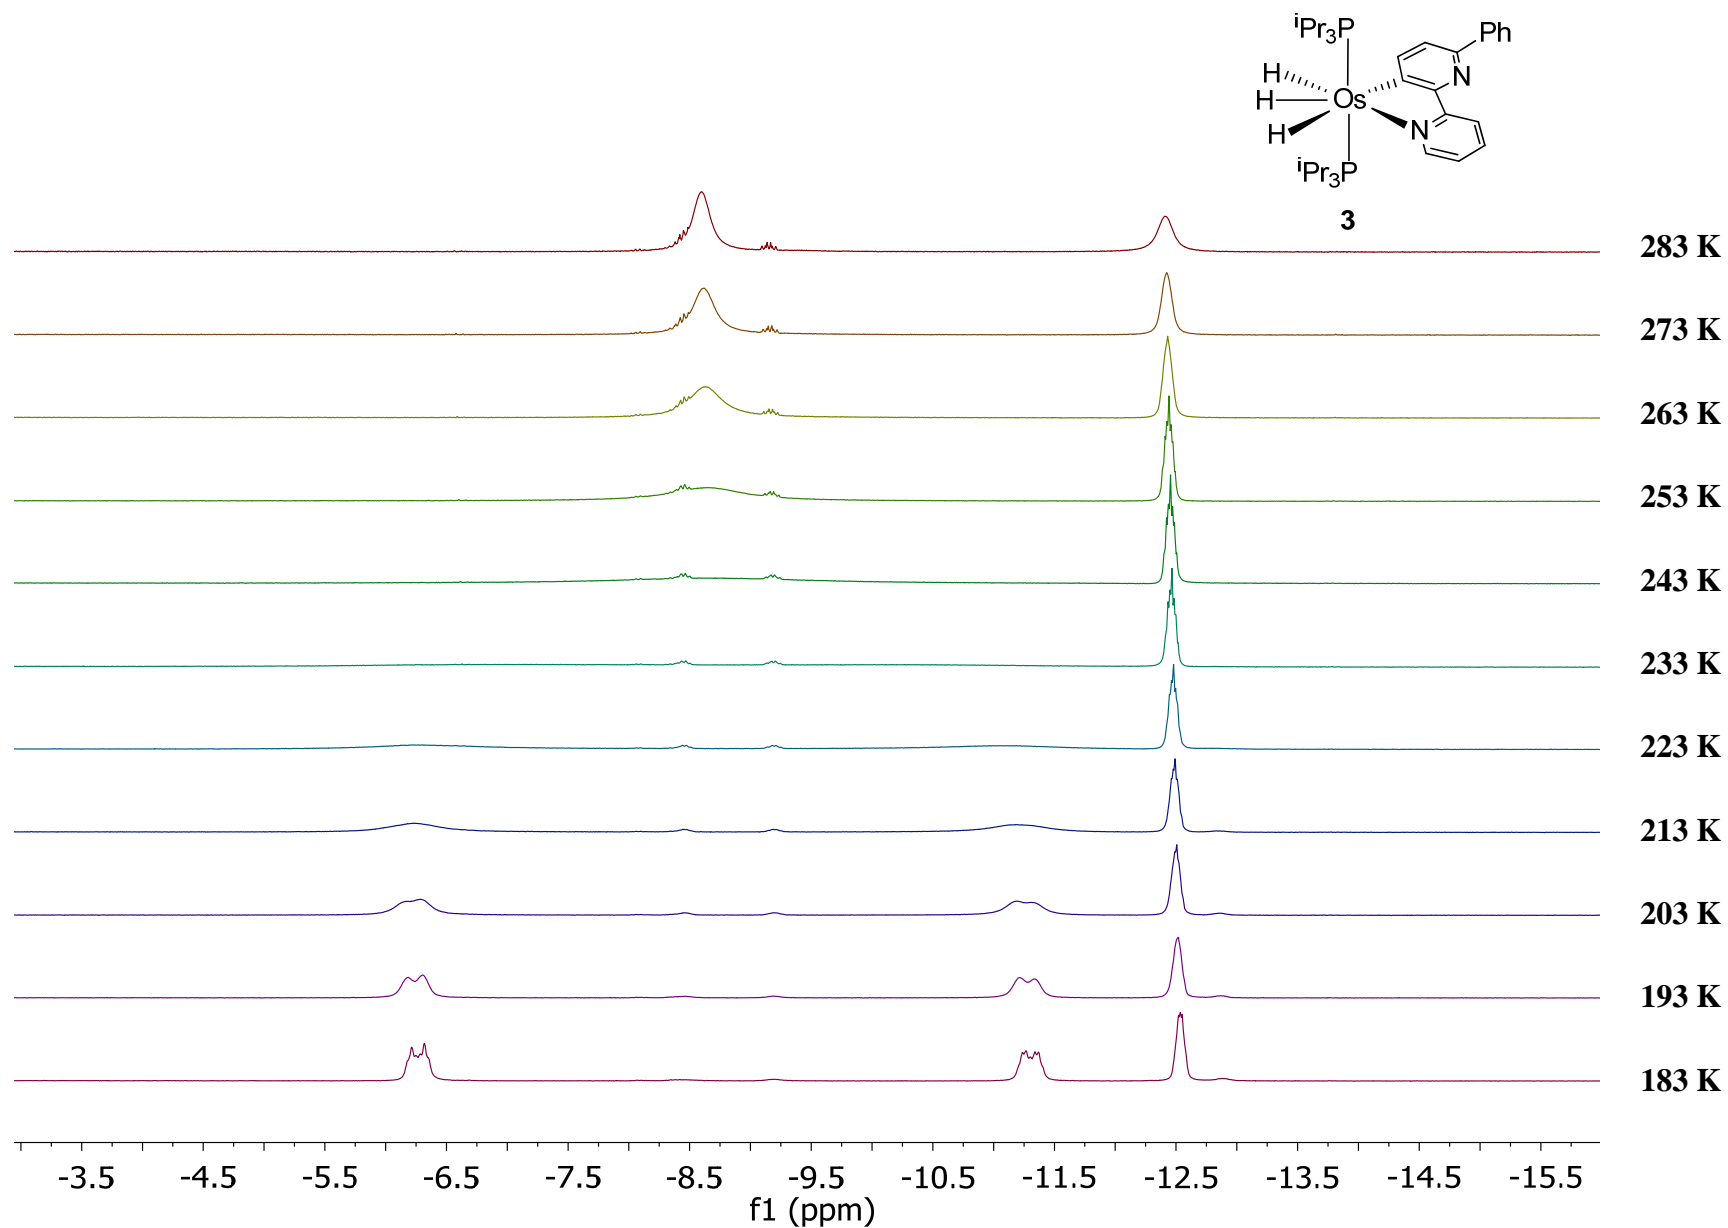

**Figure S12.** High field region of the  $^1\text{H}$  NMR spectra (400 MHz,  $\text{toluene-}d_8$ ) of compound **3** as a function of the temperature.

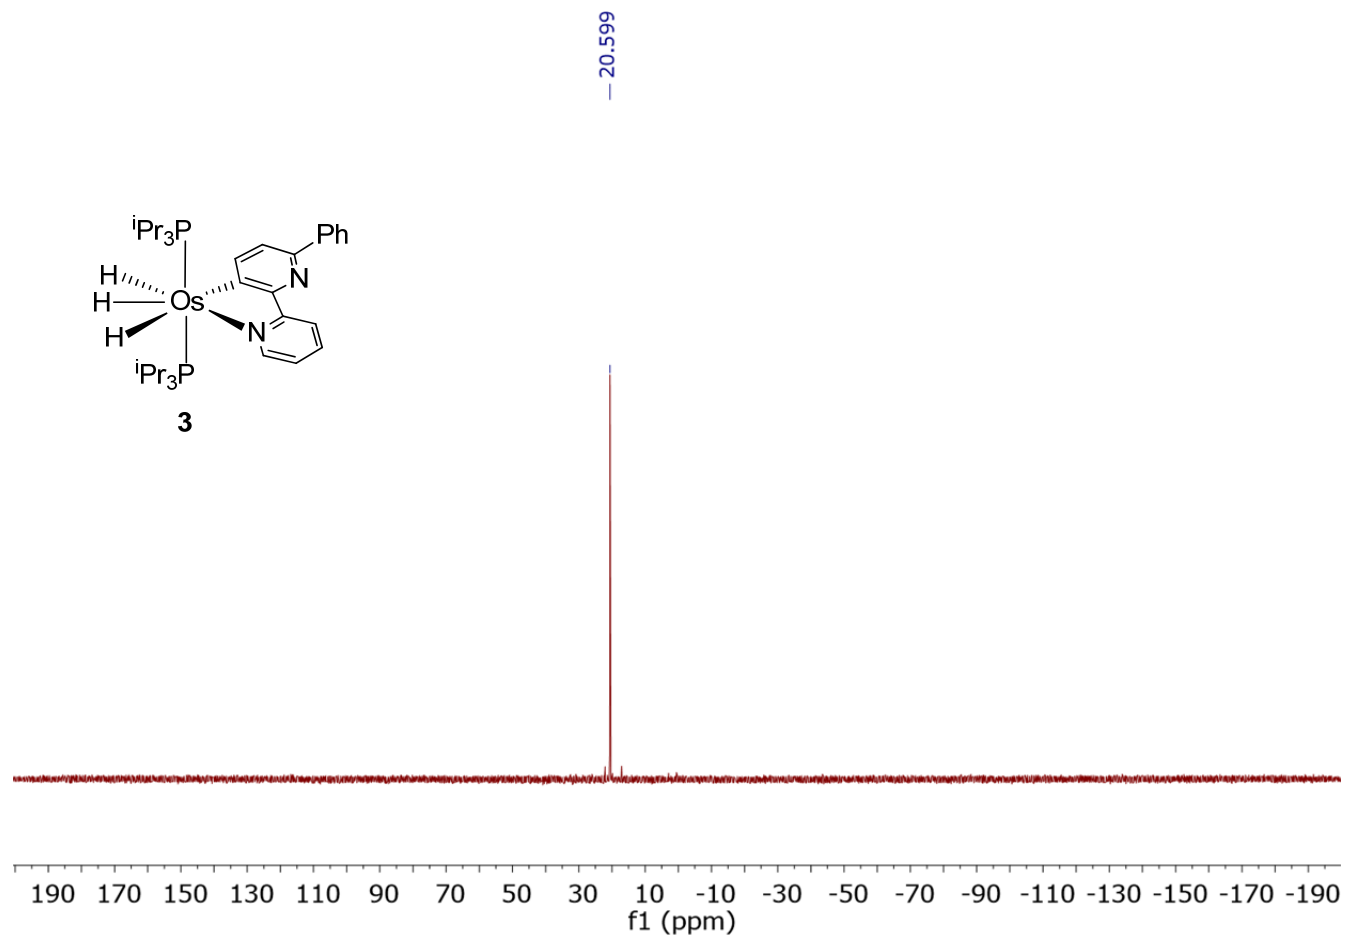

**Figure S13.**  $^{31}\text{P}\{^1\text{H}\}$  NMR spectrum (121.49 MHz,  $\text{C}_6\text{D}_6$ , 298 K) of compound **3**.

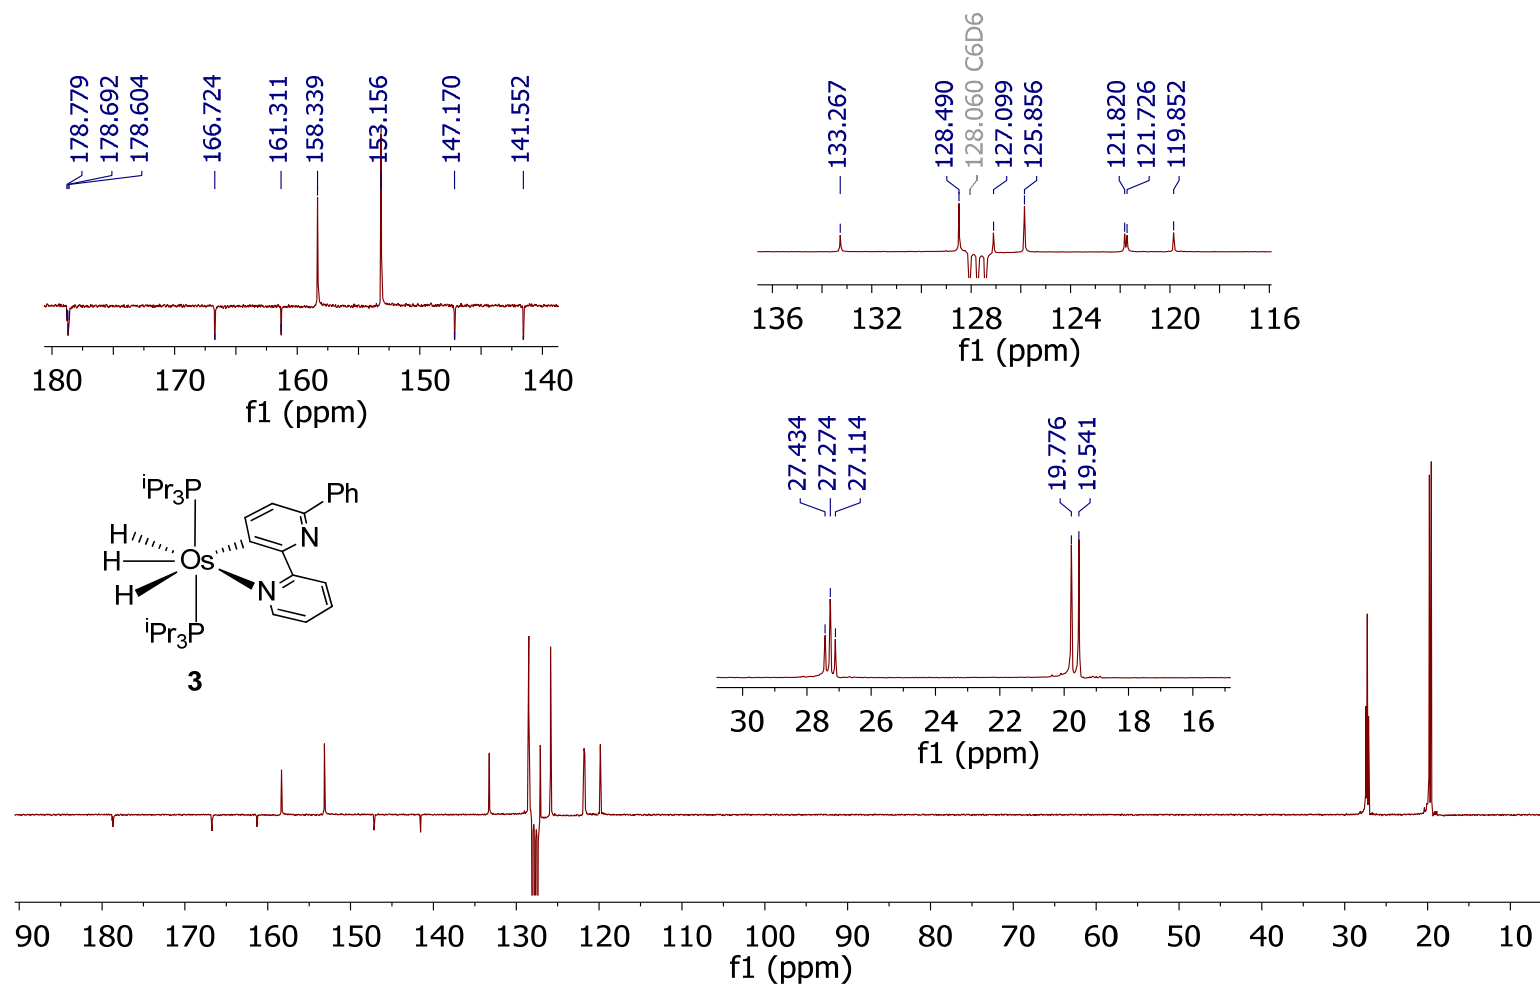

**Figure S14.**  $^{13}\text{C}\{^1\text{H}\}$ -APT NMR spectrum (75.48 MHz, C<sub>6</sub>D<sub>6</sub>, 298 K) of compound **3**.

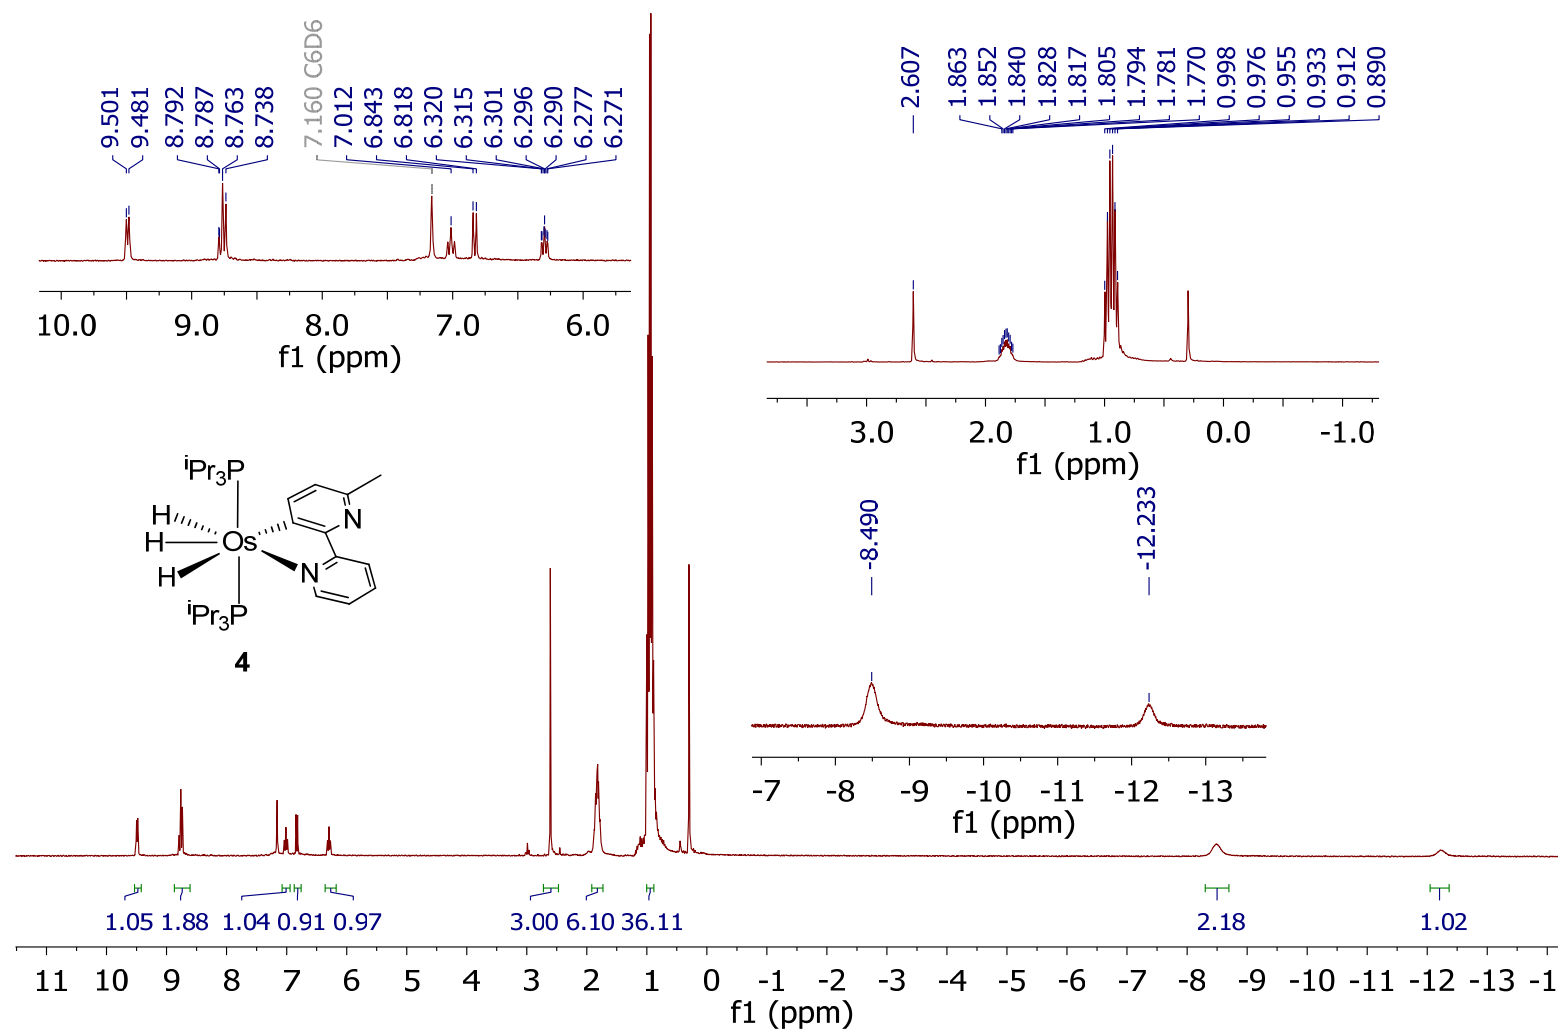

**Figure S15.** <sup>1</sup>H NMR spectrum (300.13 MHz, C<sub>6</sub>D<sub>6</sub>, 298 K) of compound **4**.

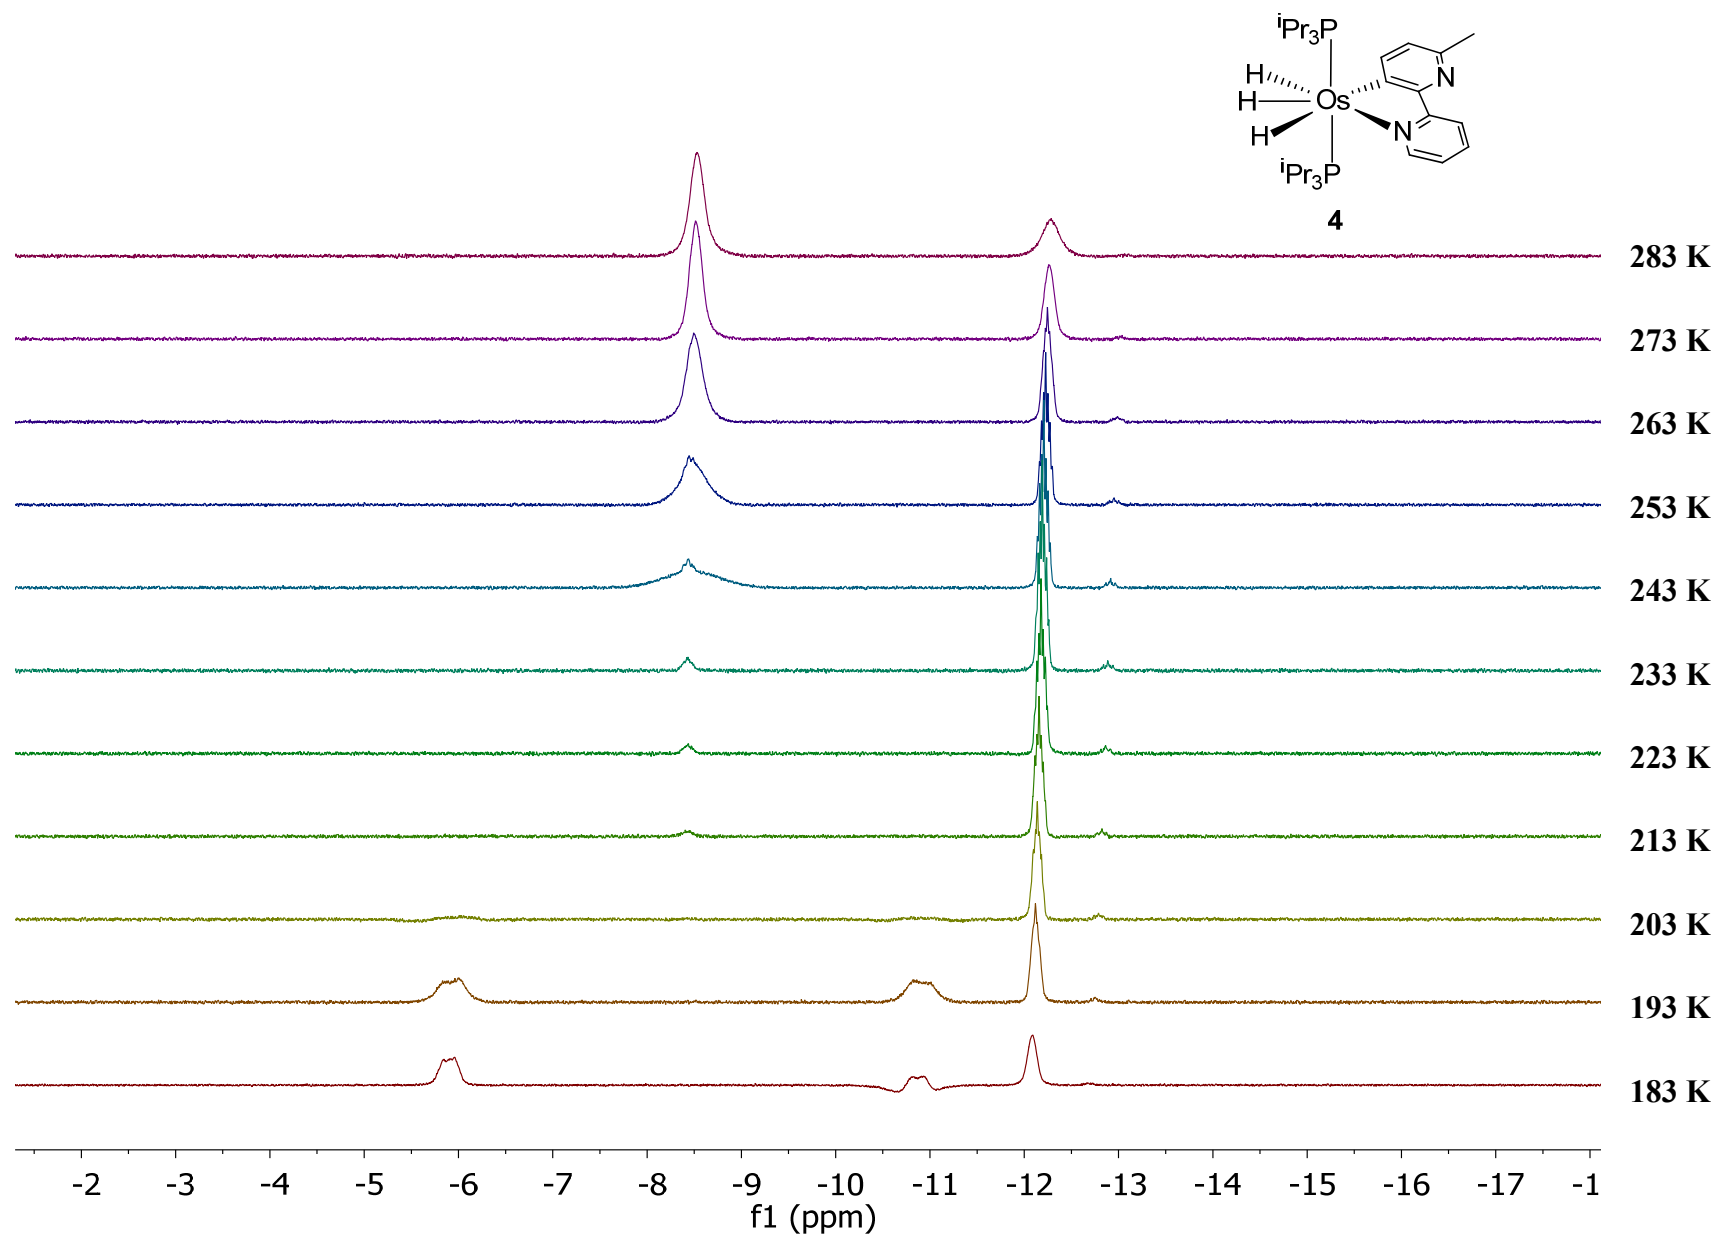

**Figure S16.** High field region of the <sup>1</sup>H NMR spectra (300.13 MHz, toluene-*d*<sub>8</sub>) of compound **4** as a function of the temperature.

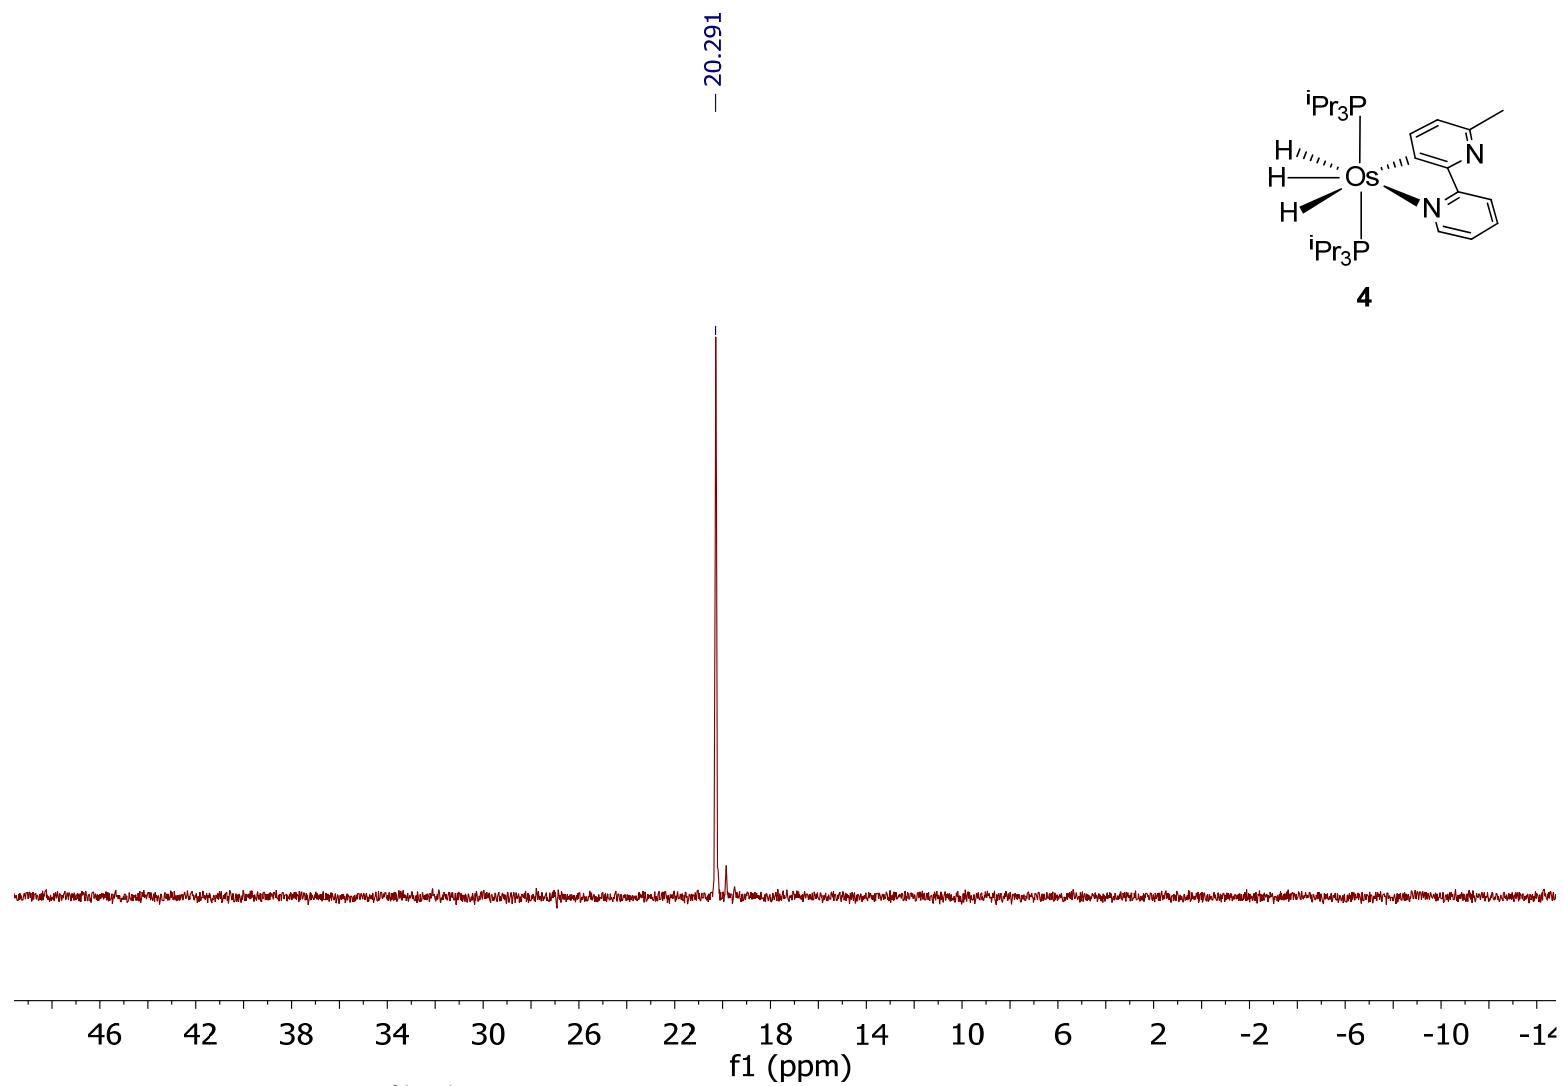

**Figure S17.**  $^{31}\text{P}\{^1\text{H}\}$  NMR spectrum (121.49 MHz, toluene- $d_8$ , 298 K) of compound 4.

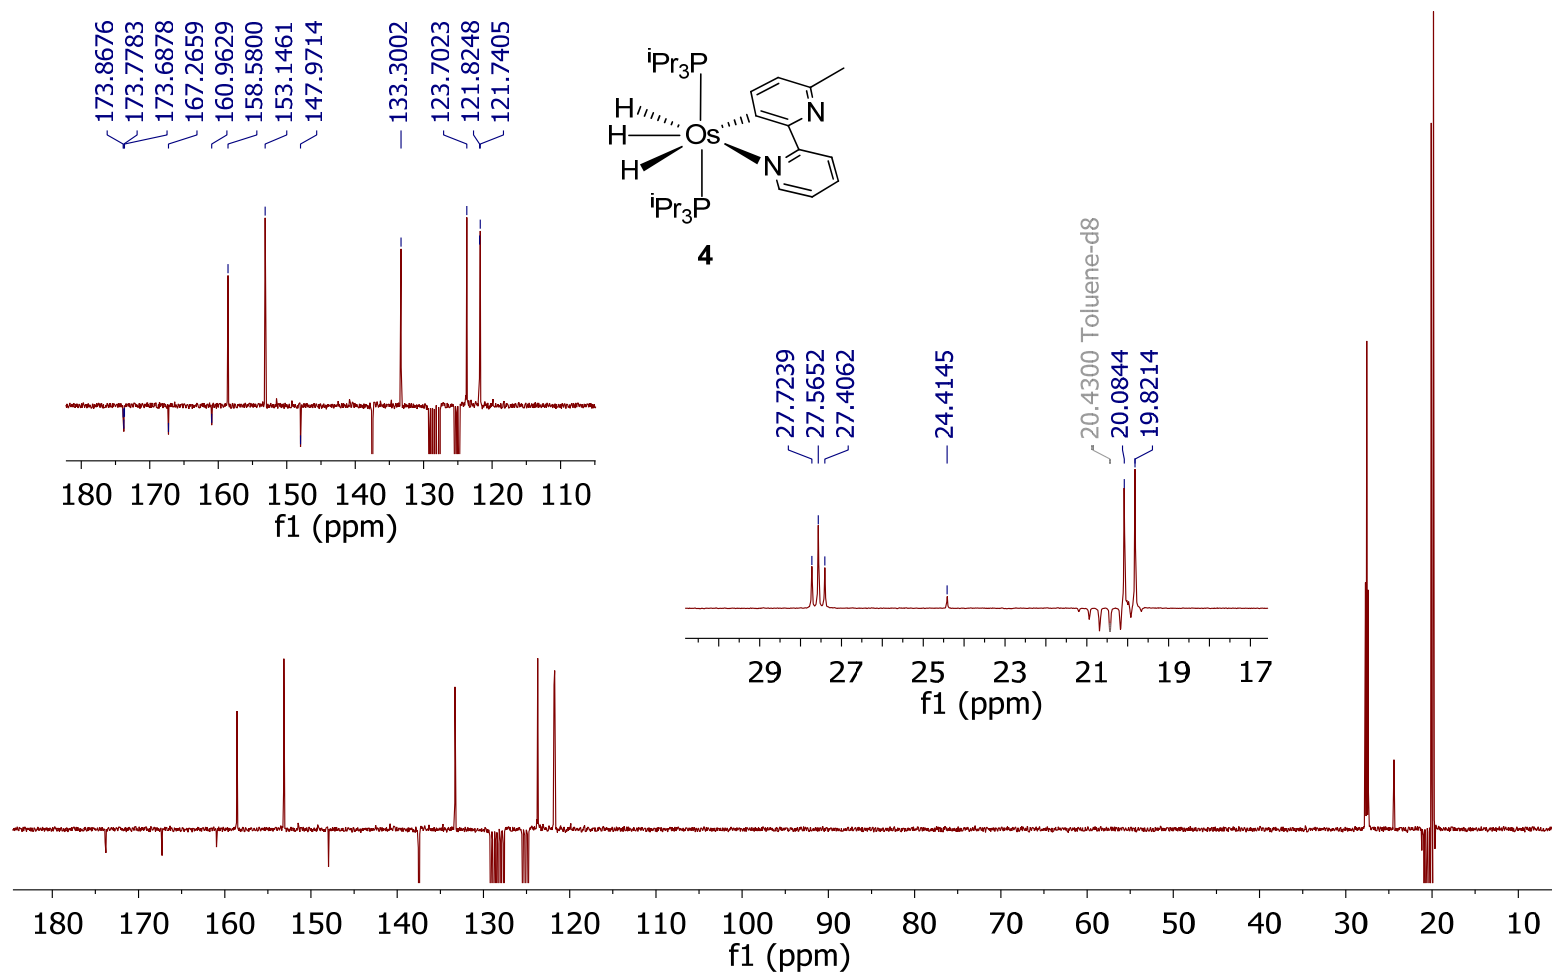

**Figure S18.**  $^{13}\text{C}\{^1\text{H}\}$ -apt NMR spectrum(75.48 MHz, toluene- $d_8$ , 298 K) of compound 4.





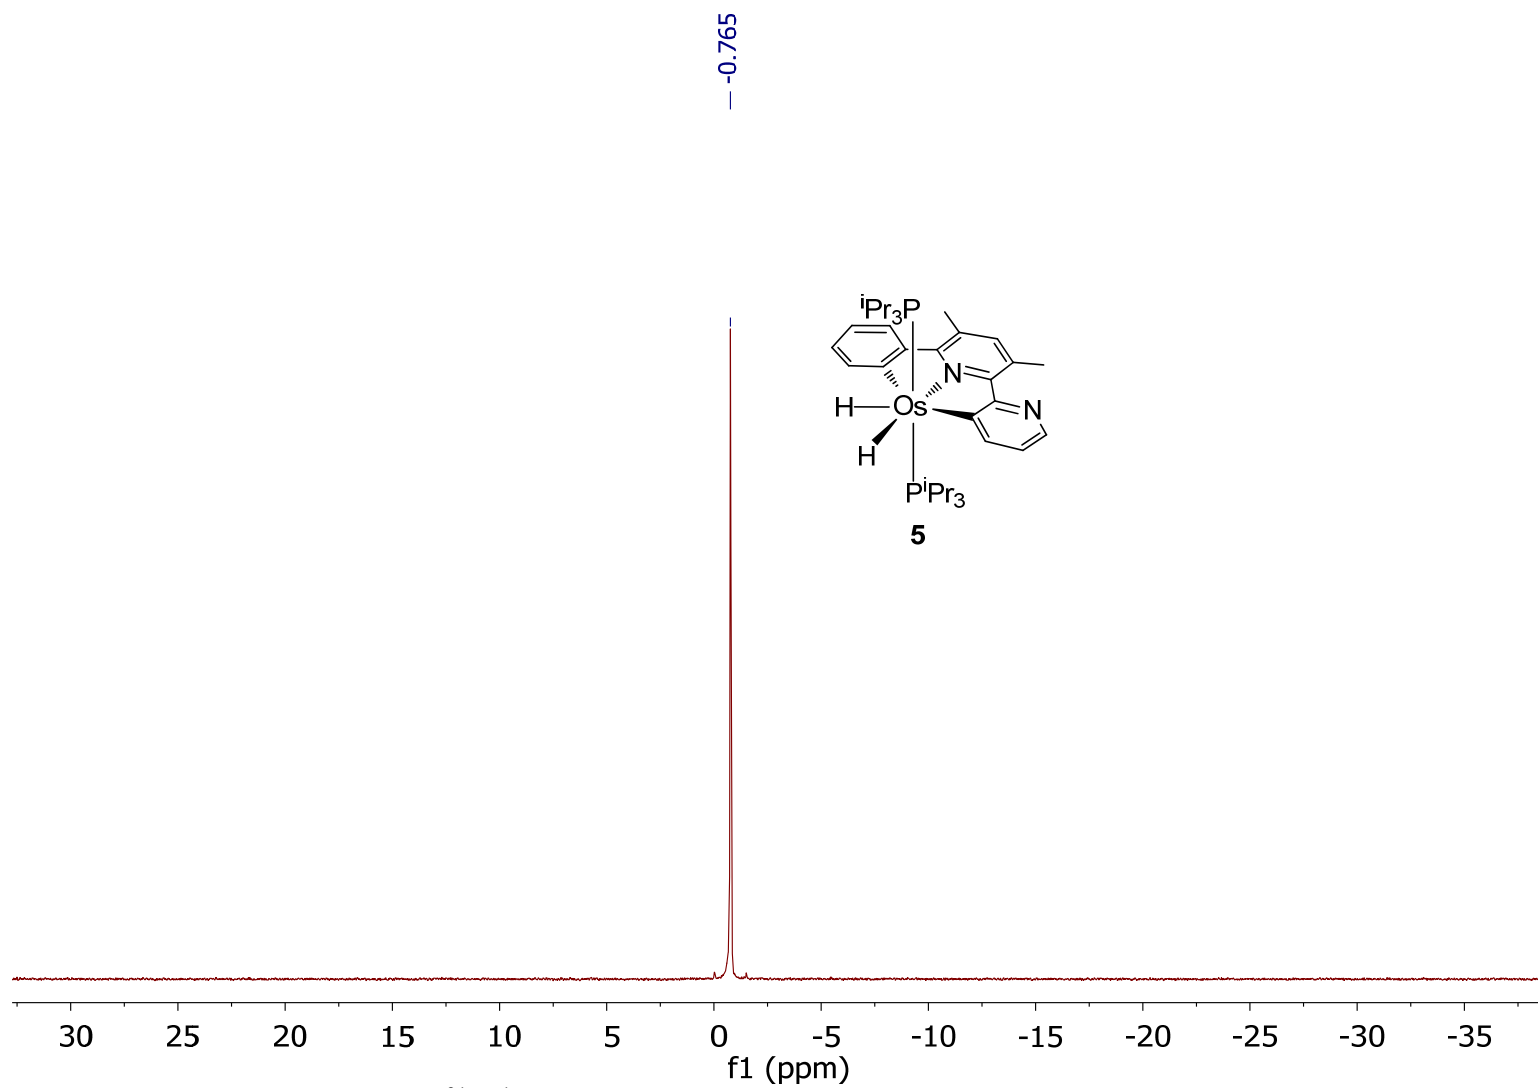

**Figure S20.**  $^{31}\text{P}\{^1\text{H}\}$  NMR spectrum (121.49 MHz,  $\text{C}_6\text{D}_6$ , 298 K) of compound **5**.

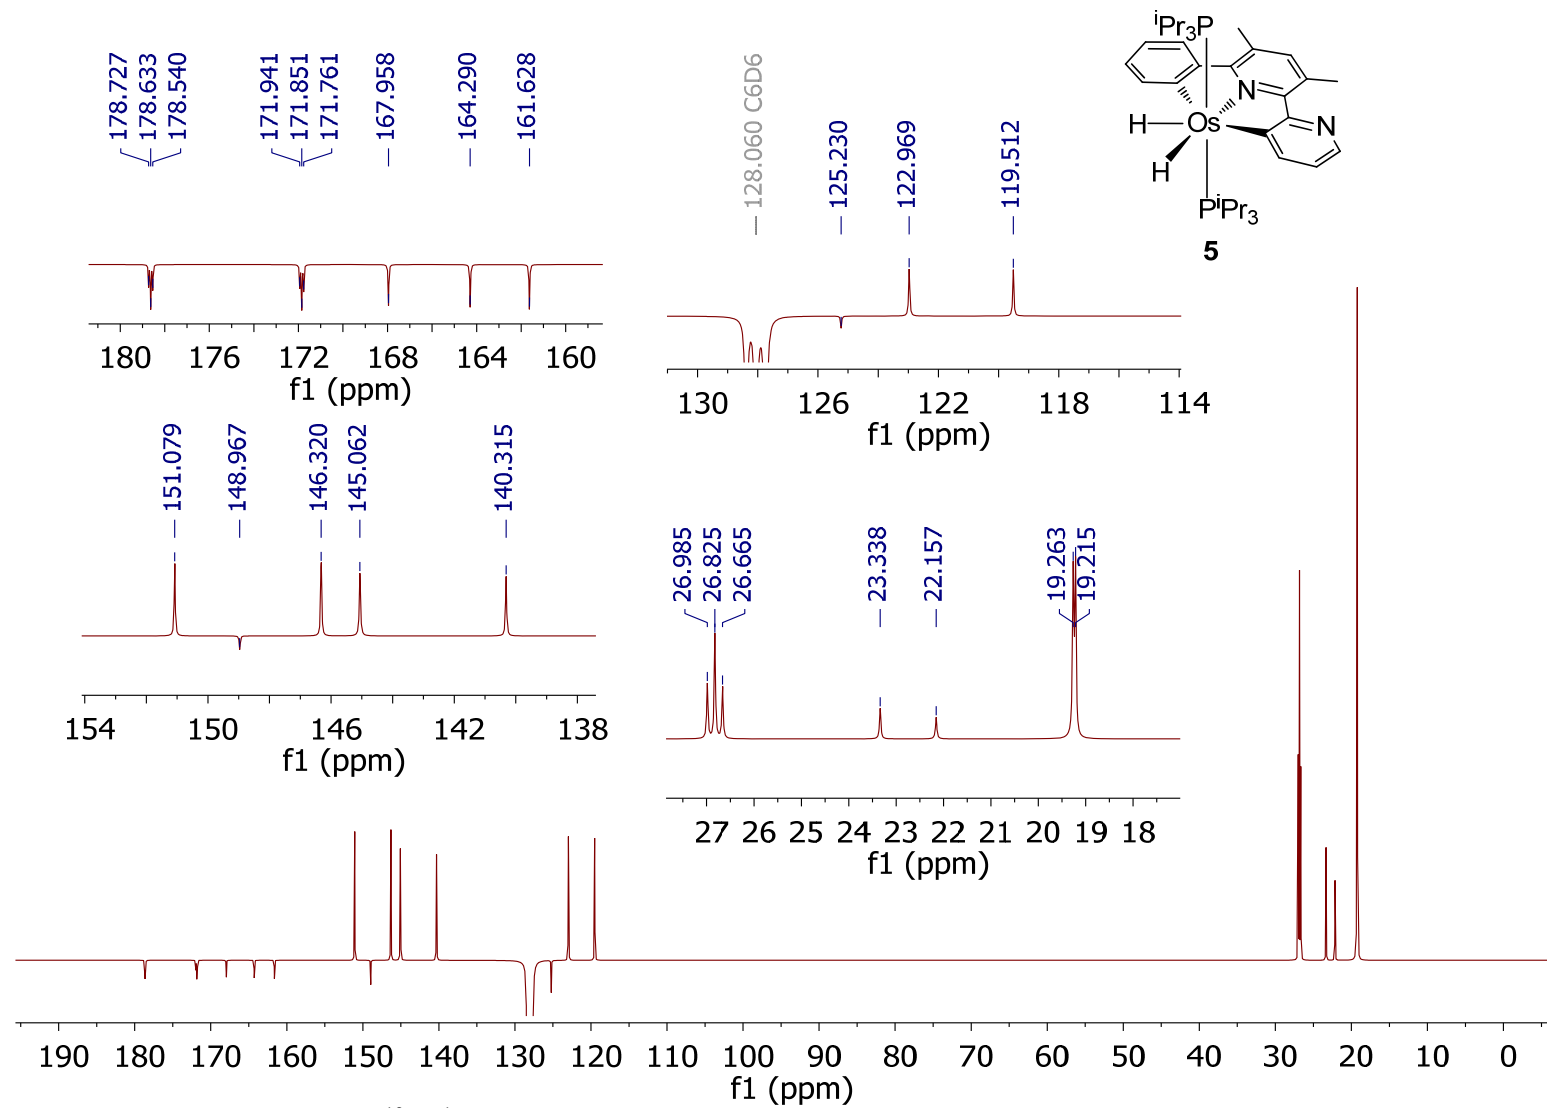

**Figure S21.**  $^{13}\text{C}\{^1\text{H}\}$ -apt NMR spectrum (75.48 MHz,  $\text{C}_6\text{D}_6$ , 298 K) of compound **5**.



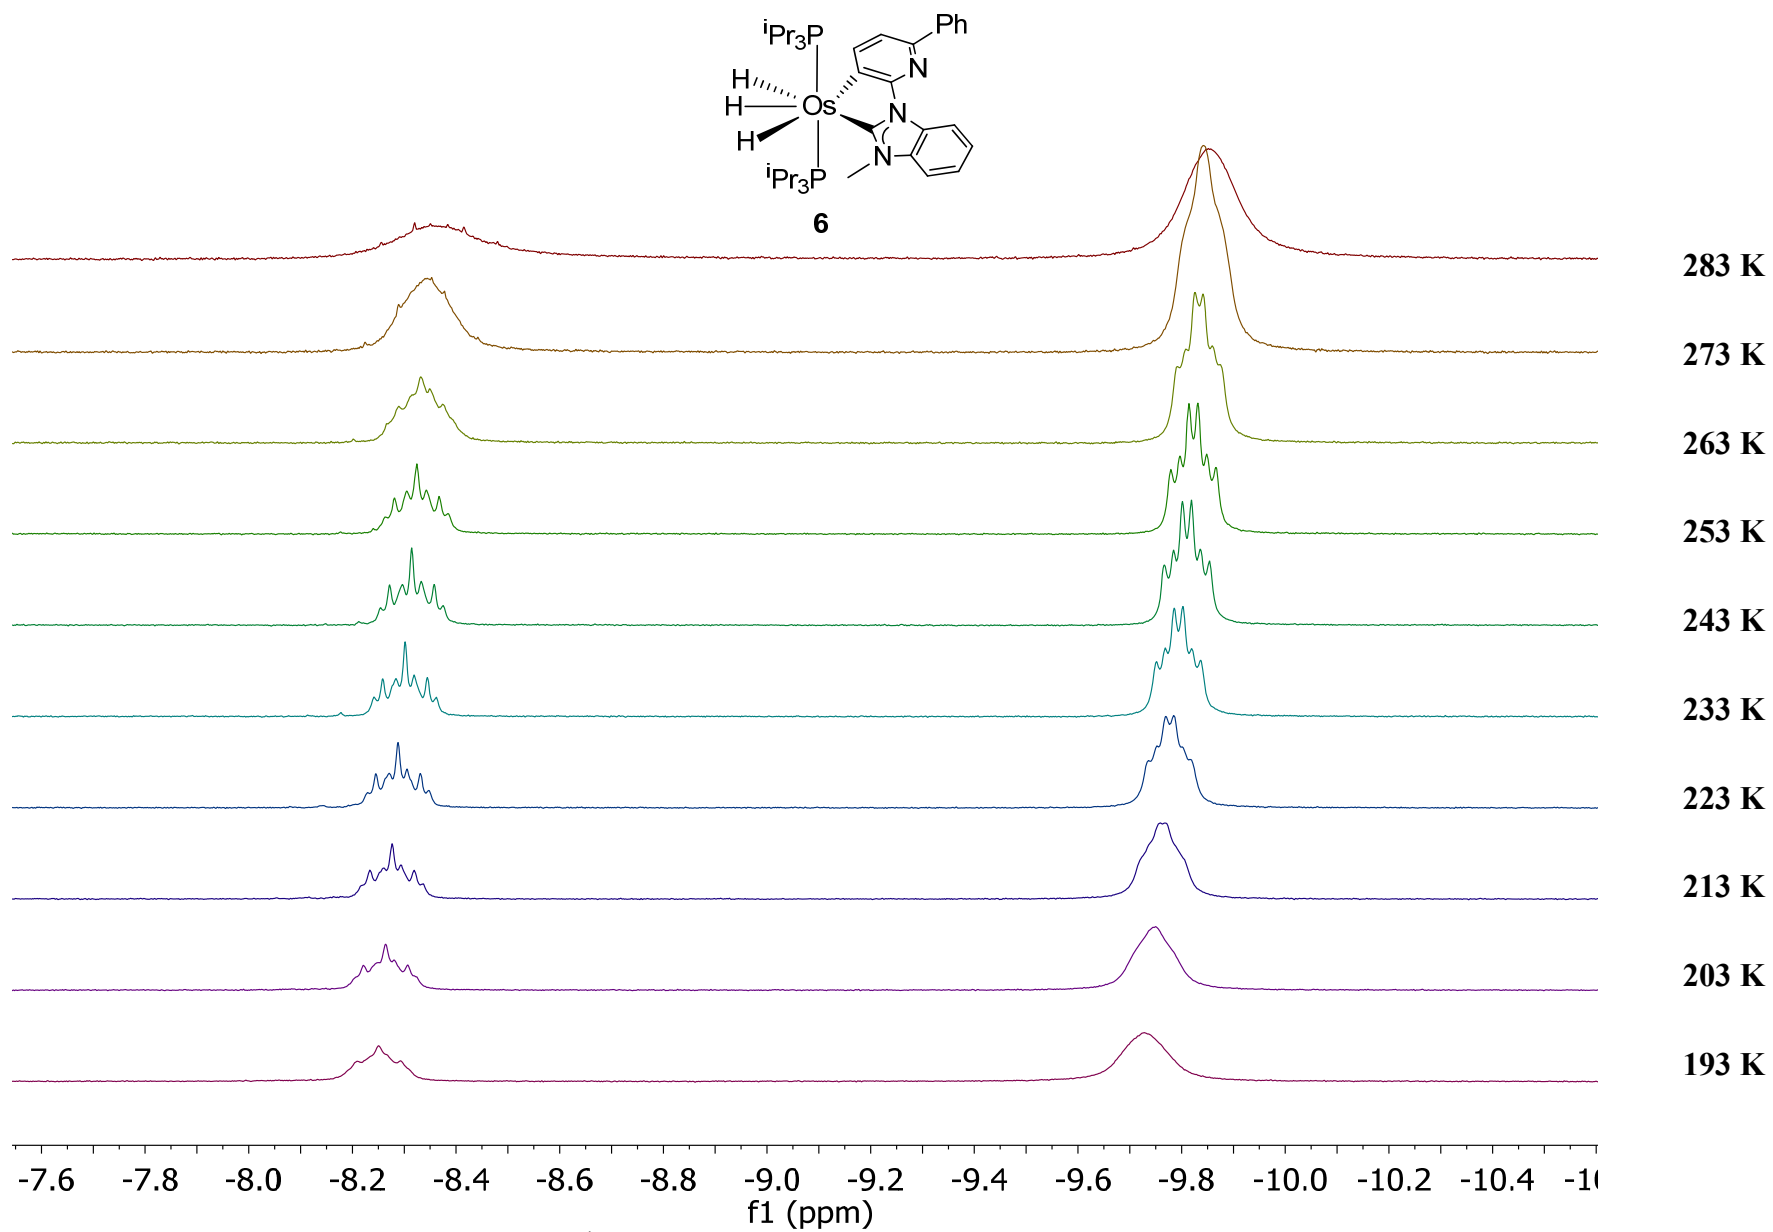

**Figure S23.** High field region of the  $^1\text{H}$  NMR spectra (400 MHz, toluene- $d_8$ ) of compound **6** as a function of the temperature.

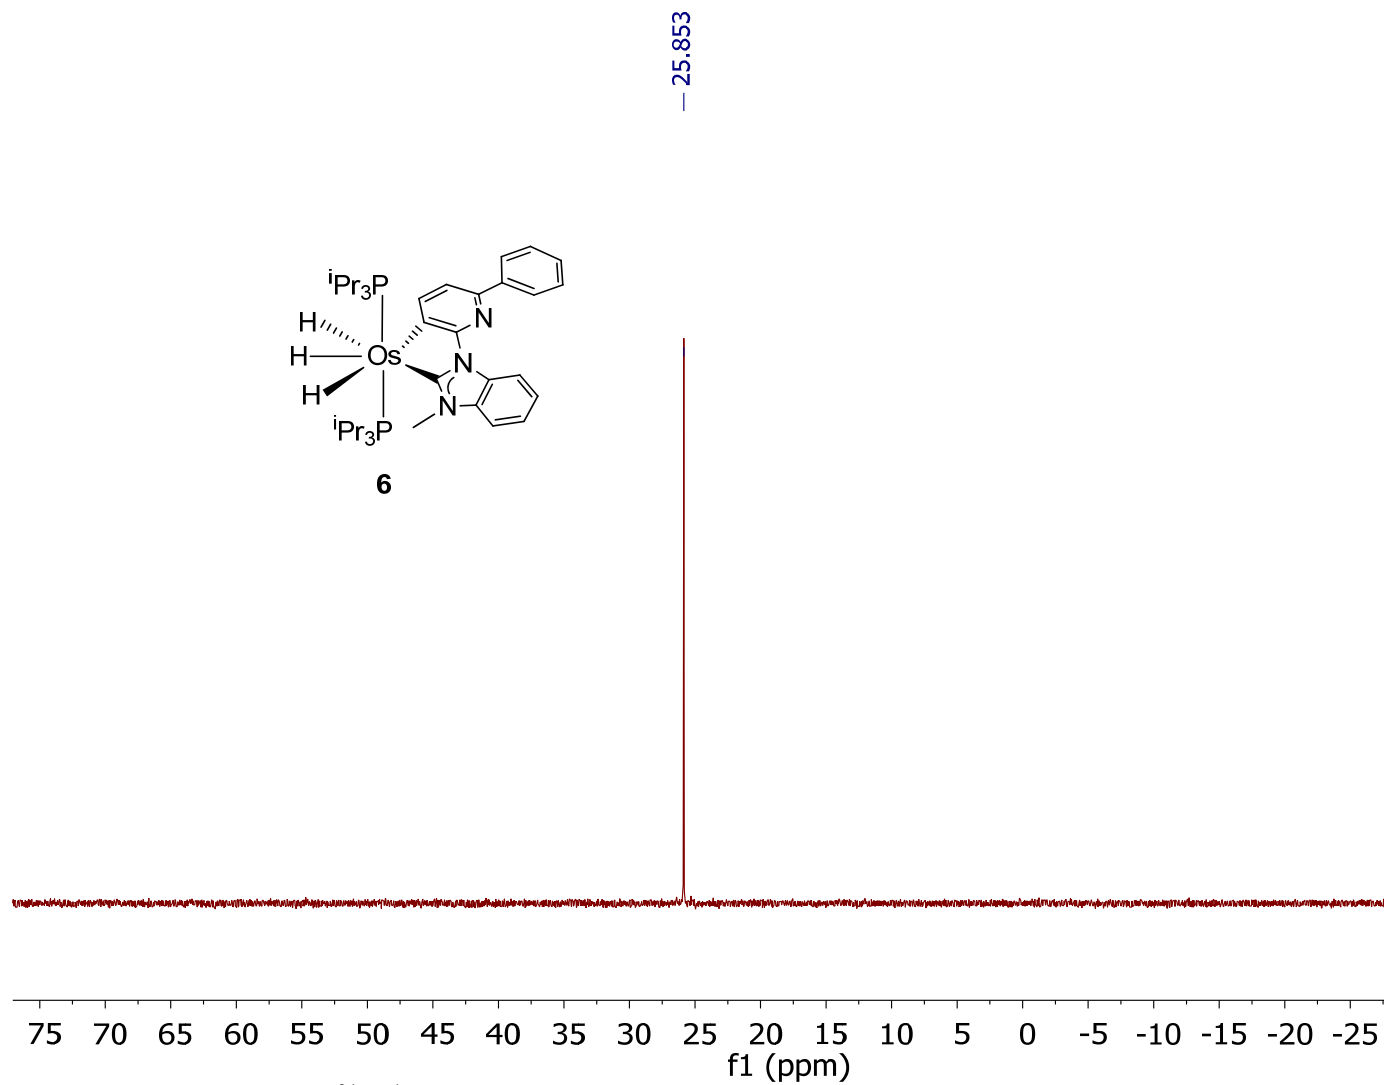

**Figure S24.**  $^{31}\text{P}\{^1\text{H}\}$  NMR spectrum (121.49 MHz,  $\text{C}_6\text{D}_6$ , 298 K) of compound **6**.

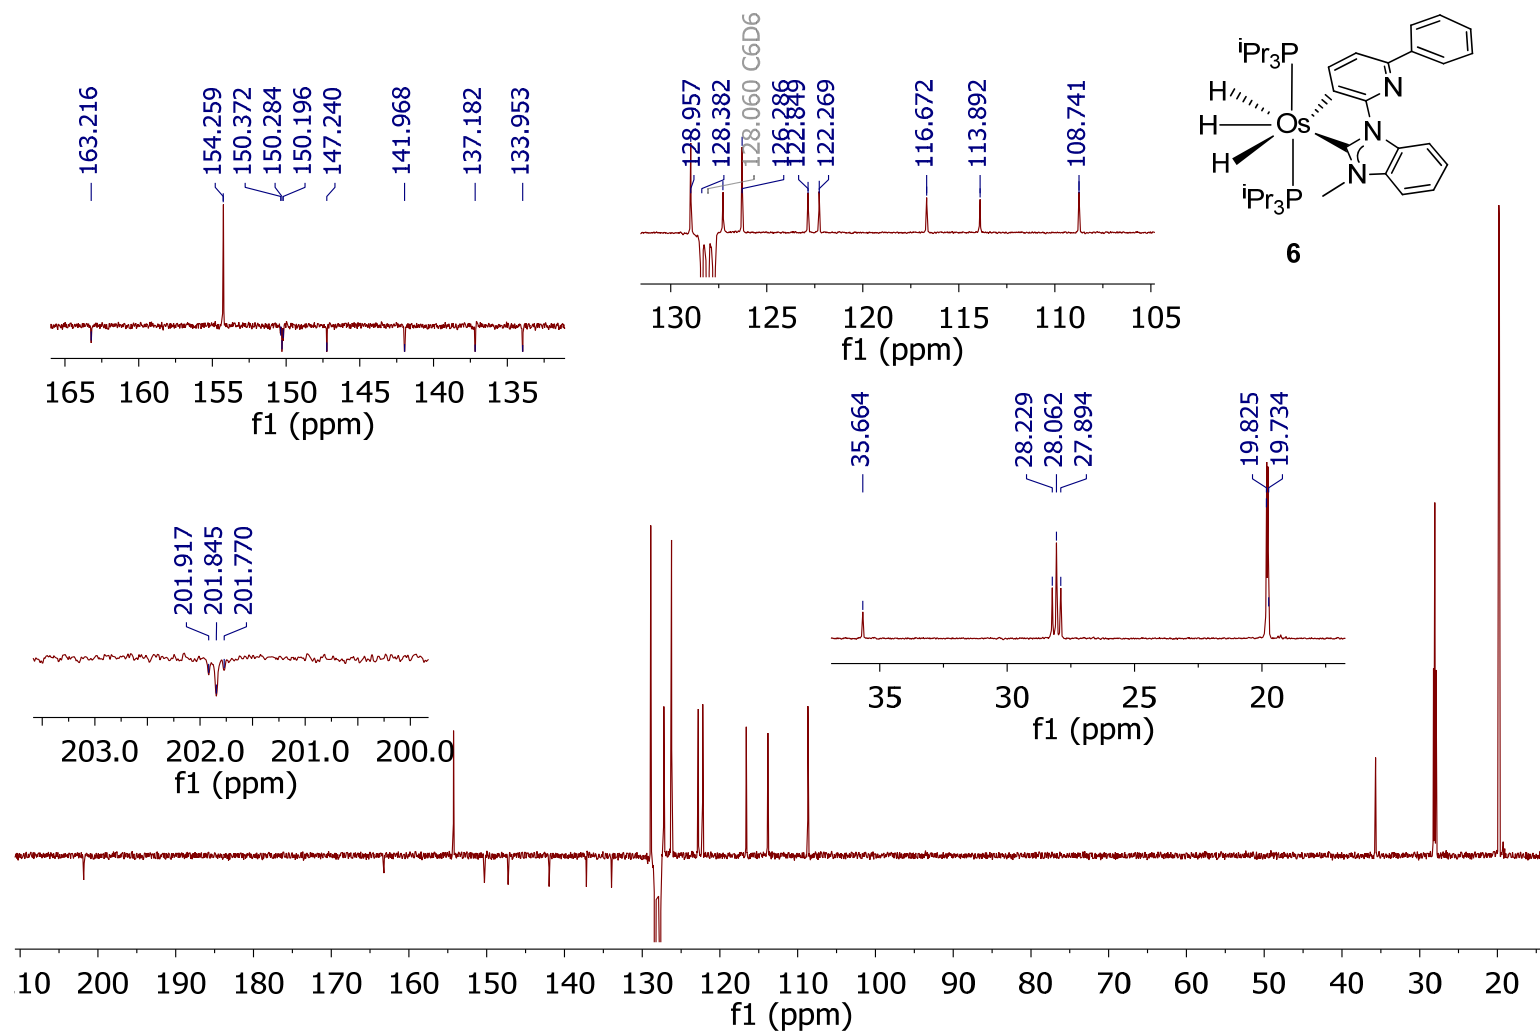

**Figure S25.**  $^{13}\text{C}\{^1\text{H}\}$ -apt NMR spectrum (75. 48 MHz,  $\text{C}_6\text{D}_6$ , 298 K) of compound **6**.

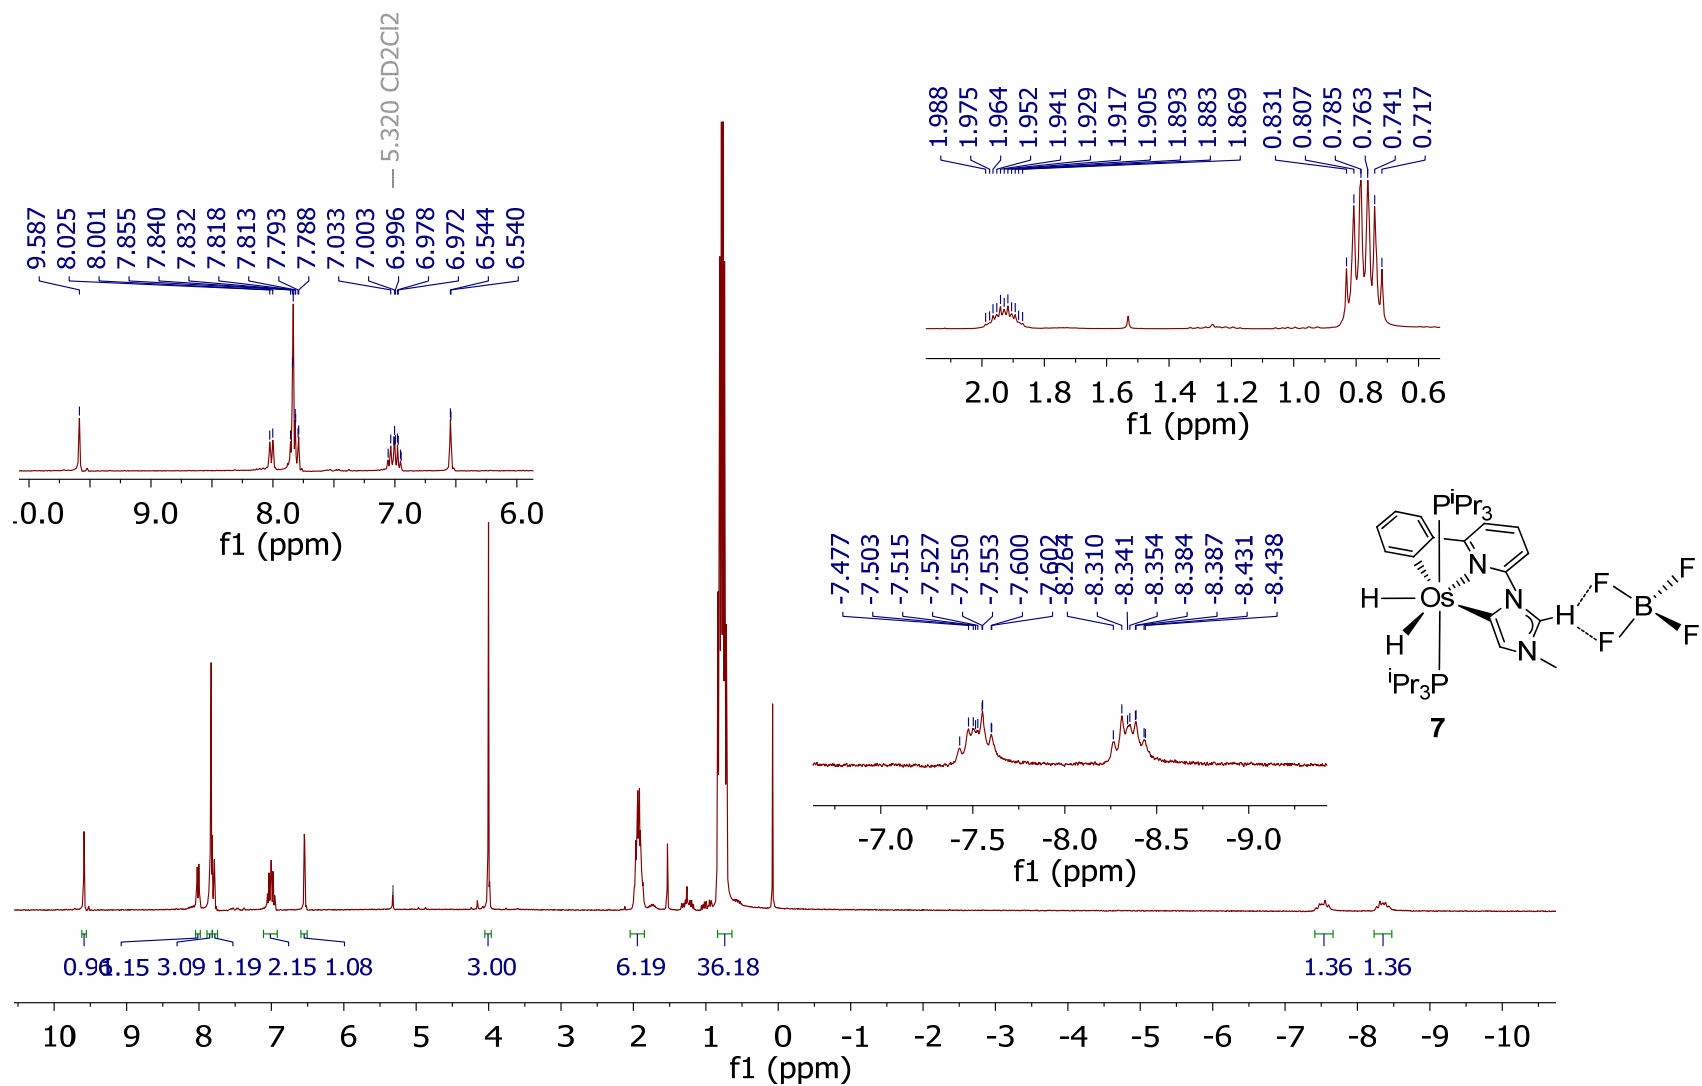

**Figure S26.** <sup>1</sup>H NMR spectrum (300.13 MHz, CD<sub>2</sub>Cl<sub>2</sub>, 298 K) of compound 7.

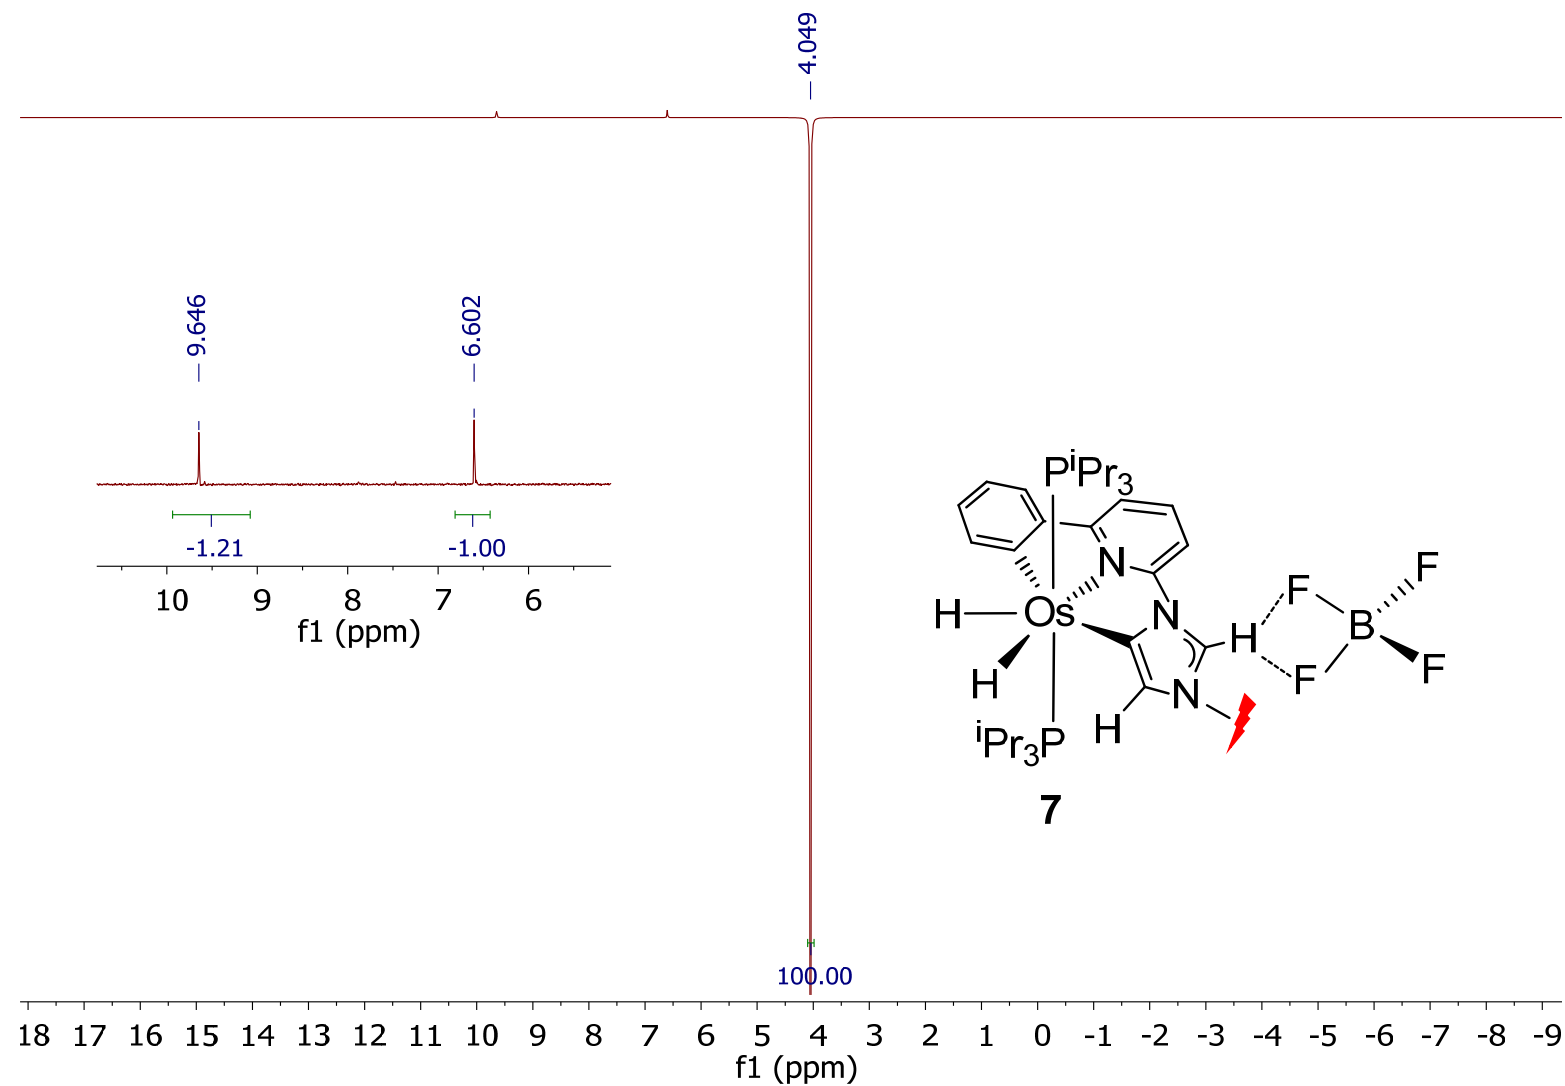

**Figure S27.**  $^1\text{H}$  NMR 1D-NOE (400.13 MHz,  $\text{CD}_2\text{Cl}_2$ , 298 K) spectrum of compound **7** obtained by selective excitation of the signal at 4.00 ppm (mixing time  $d_8 = 0.364$  s).



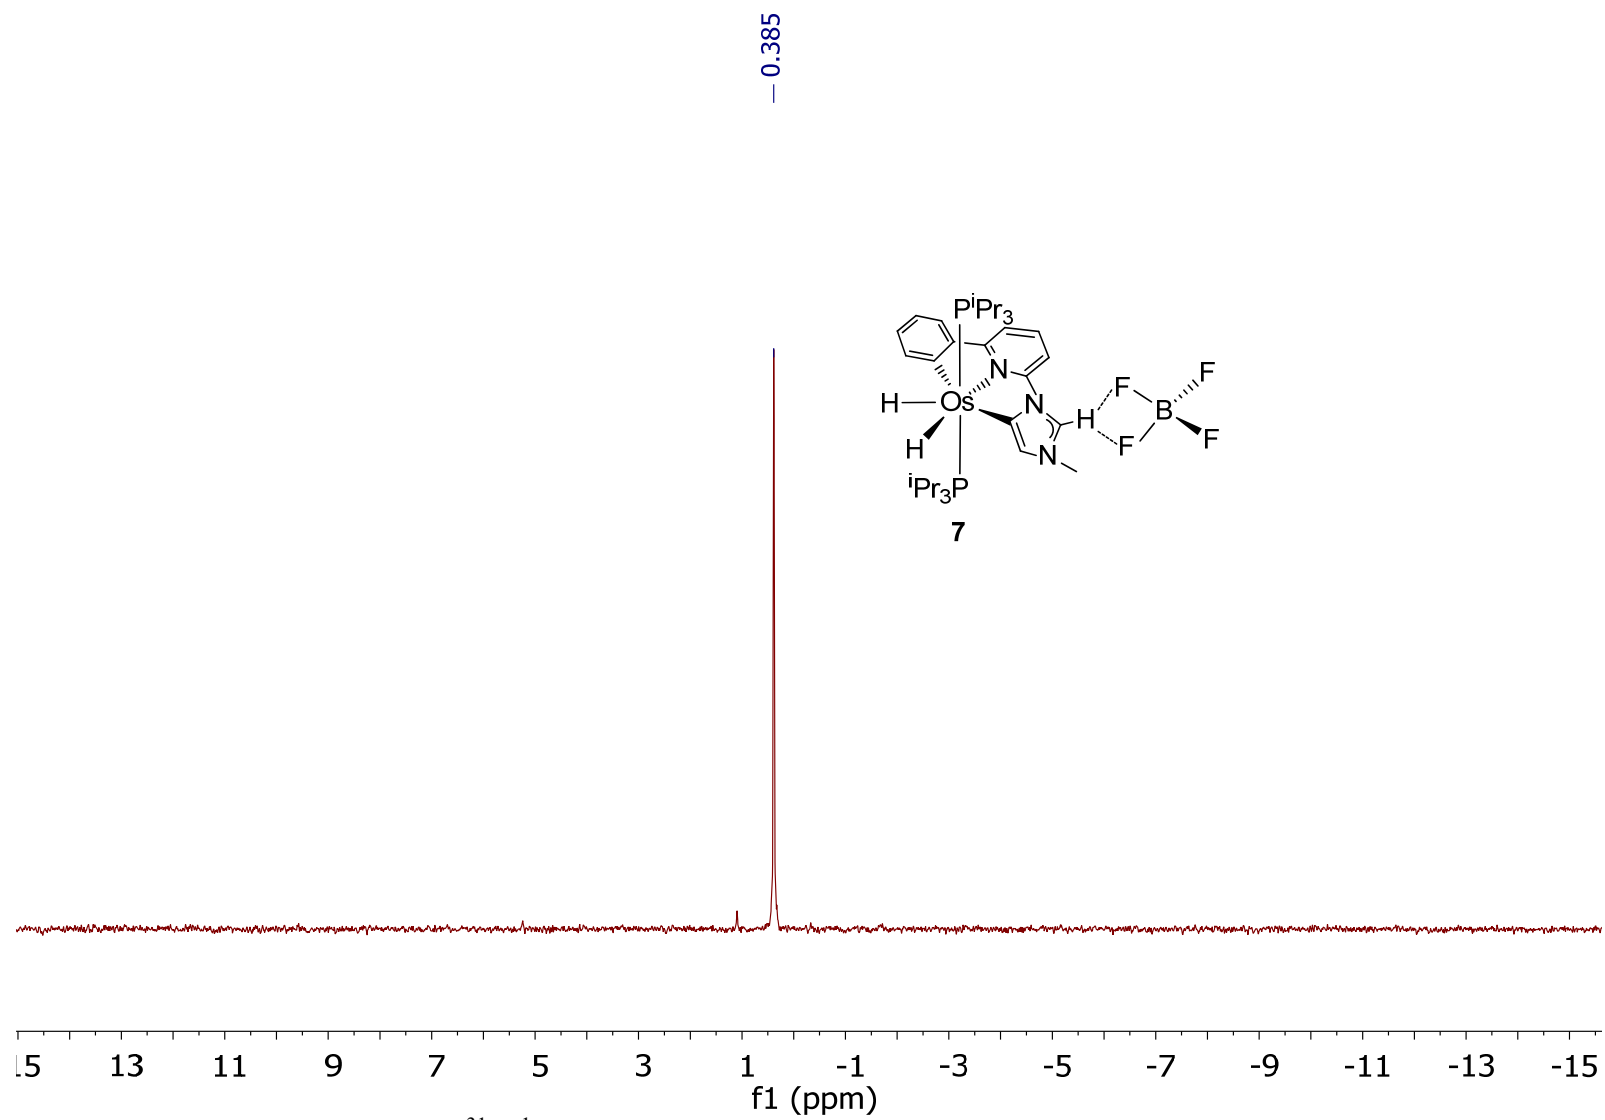

**Figure S28.**  $^{31}\text{P}\{^1\text{H}\}$  NMR spectrum (121.49 MHz,  $\text{CD}_2\text{Cl}_2$ , 298 K) of compound 7.

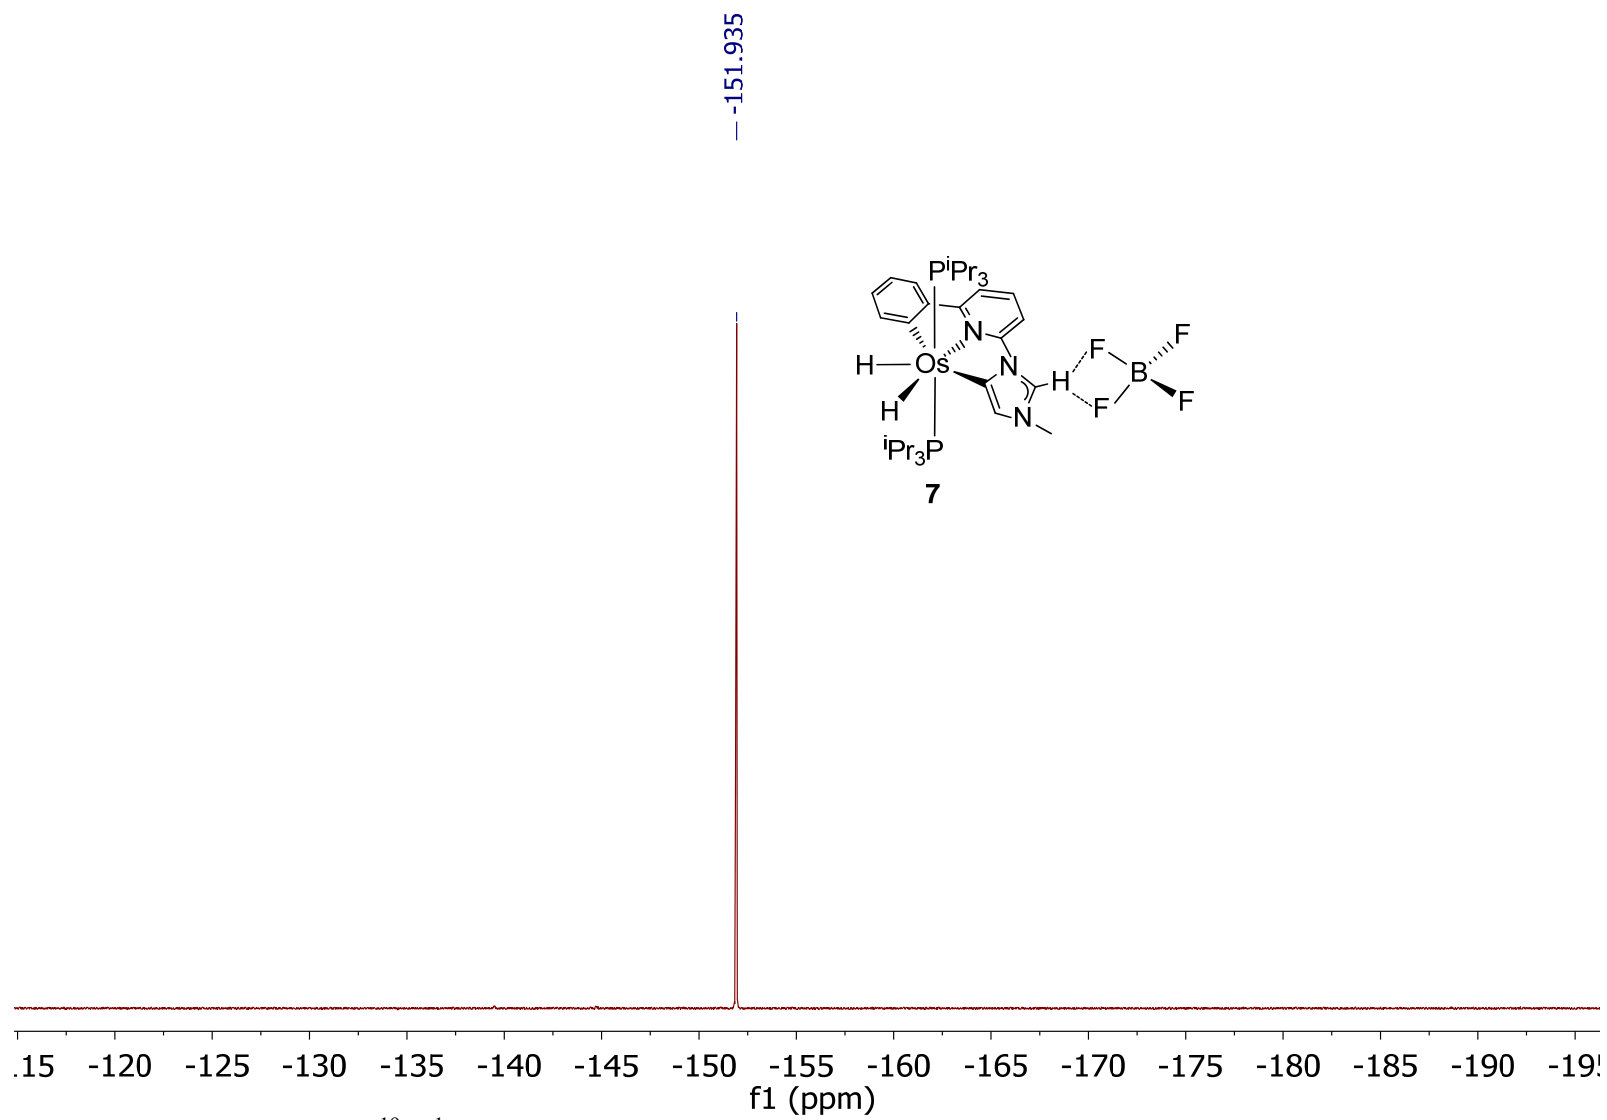

**Figure S29.**  $^{19}\text{F}\{^1\text{H}\}$  NMR spectrum (376.49 MHz,  $\text{CD}_2\text{Cl}_2$ , 298 K) of compound **7**.

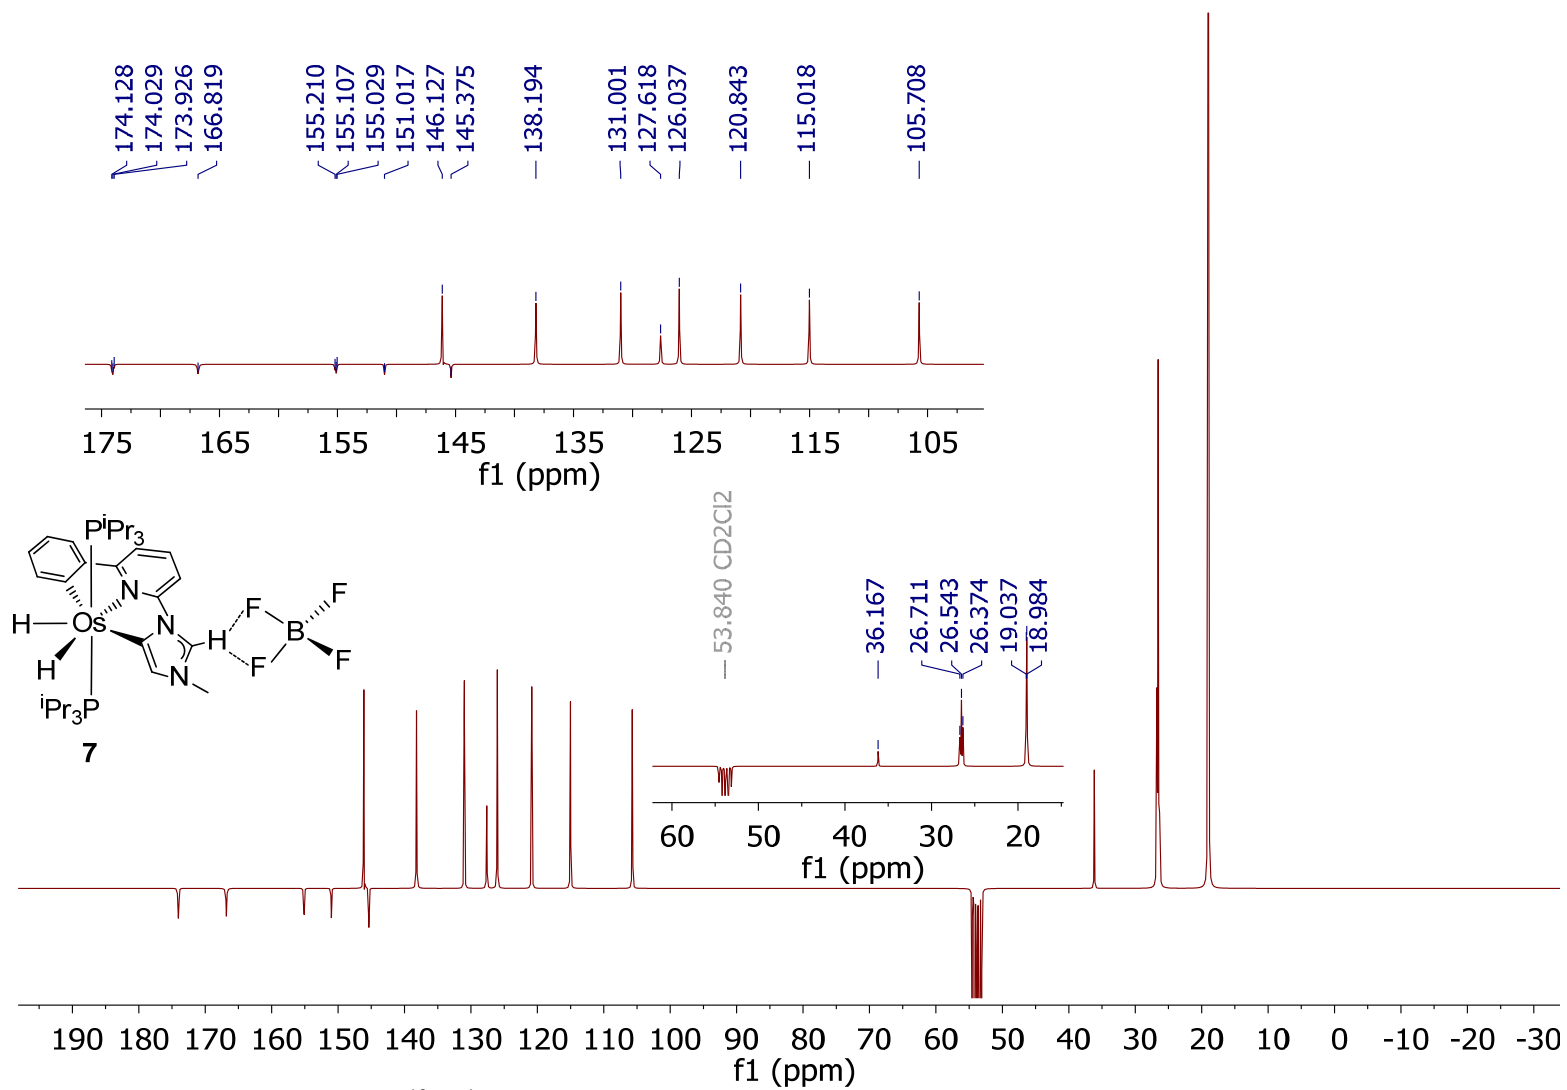

**Figure S30.**  $^{13}\text{C}\{^1\text{H}\}$ -apt NMR spectrum (75.48 MHz,  $\text{CD}_2\text{Cl}_2$ , 298 K) of compound **7**.

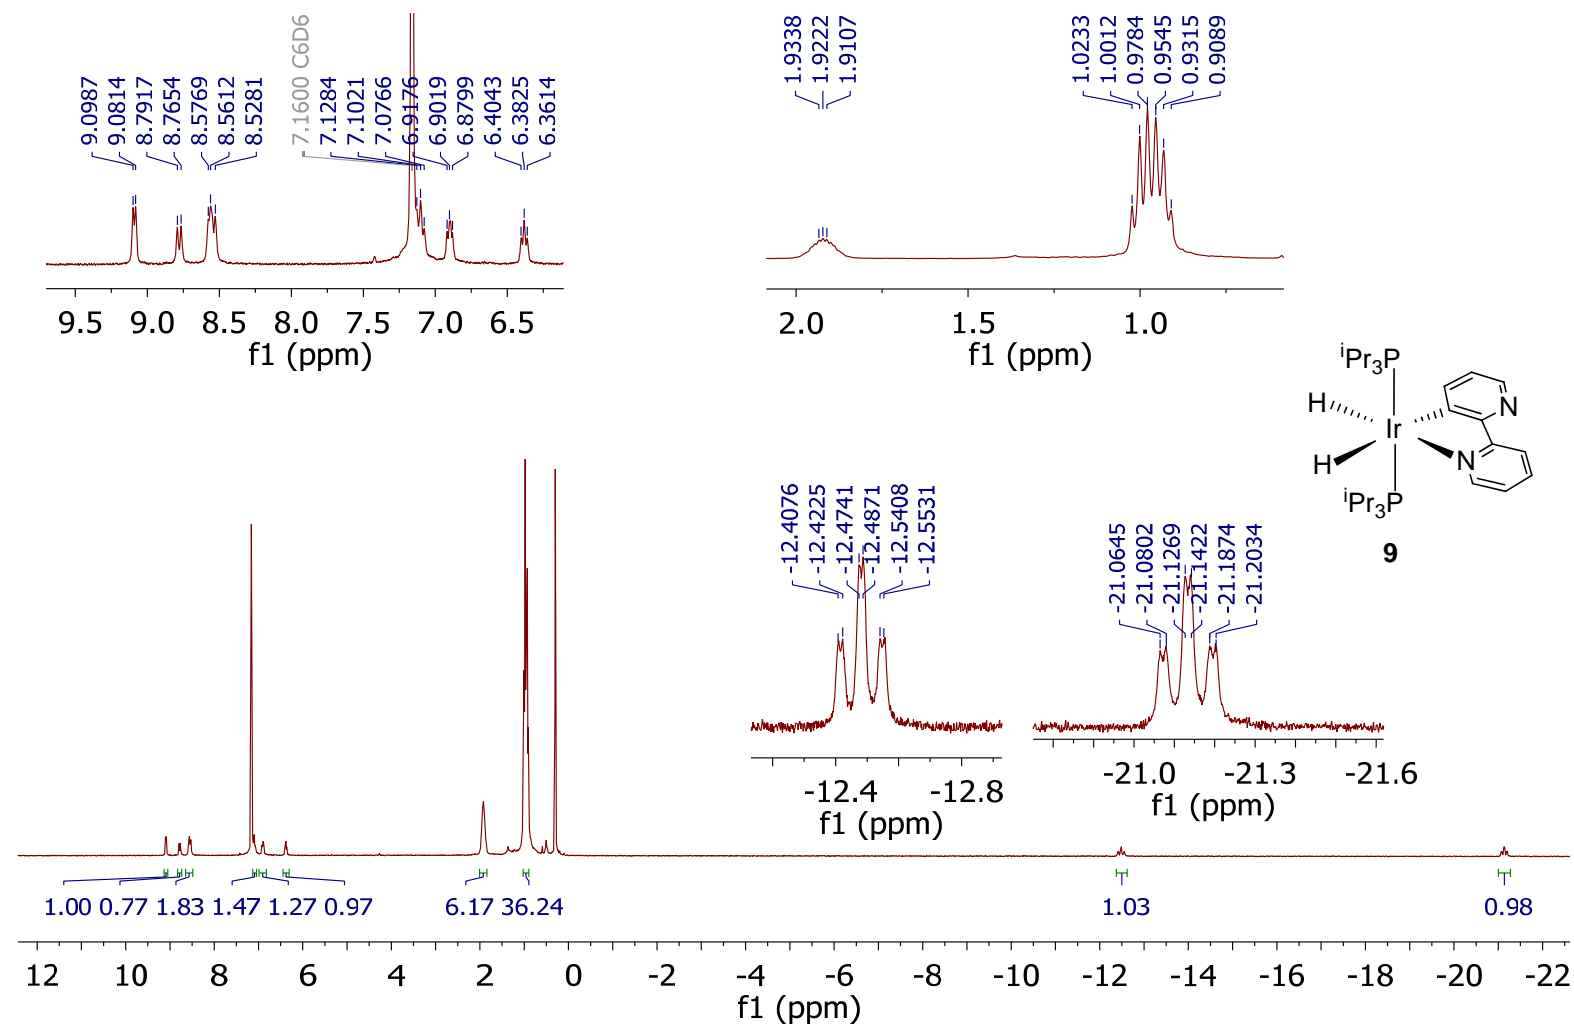

Figure S31. <sup>1</sup>H NMR spectrum (300.13 MHz C<sub>6</sub>D<sub>6</sub>, 298 K) of compound 9.

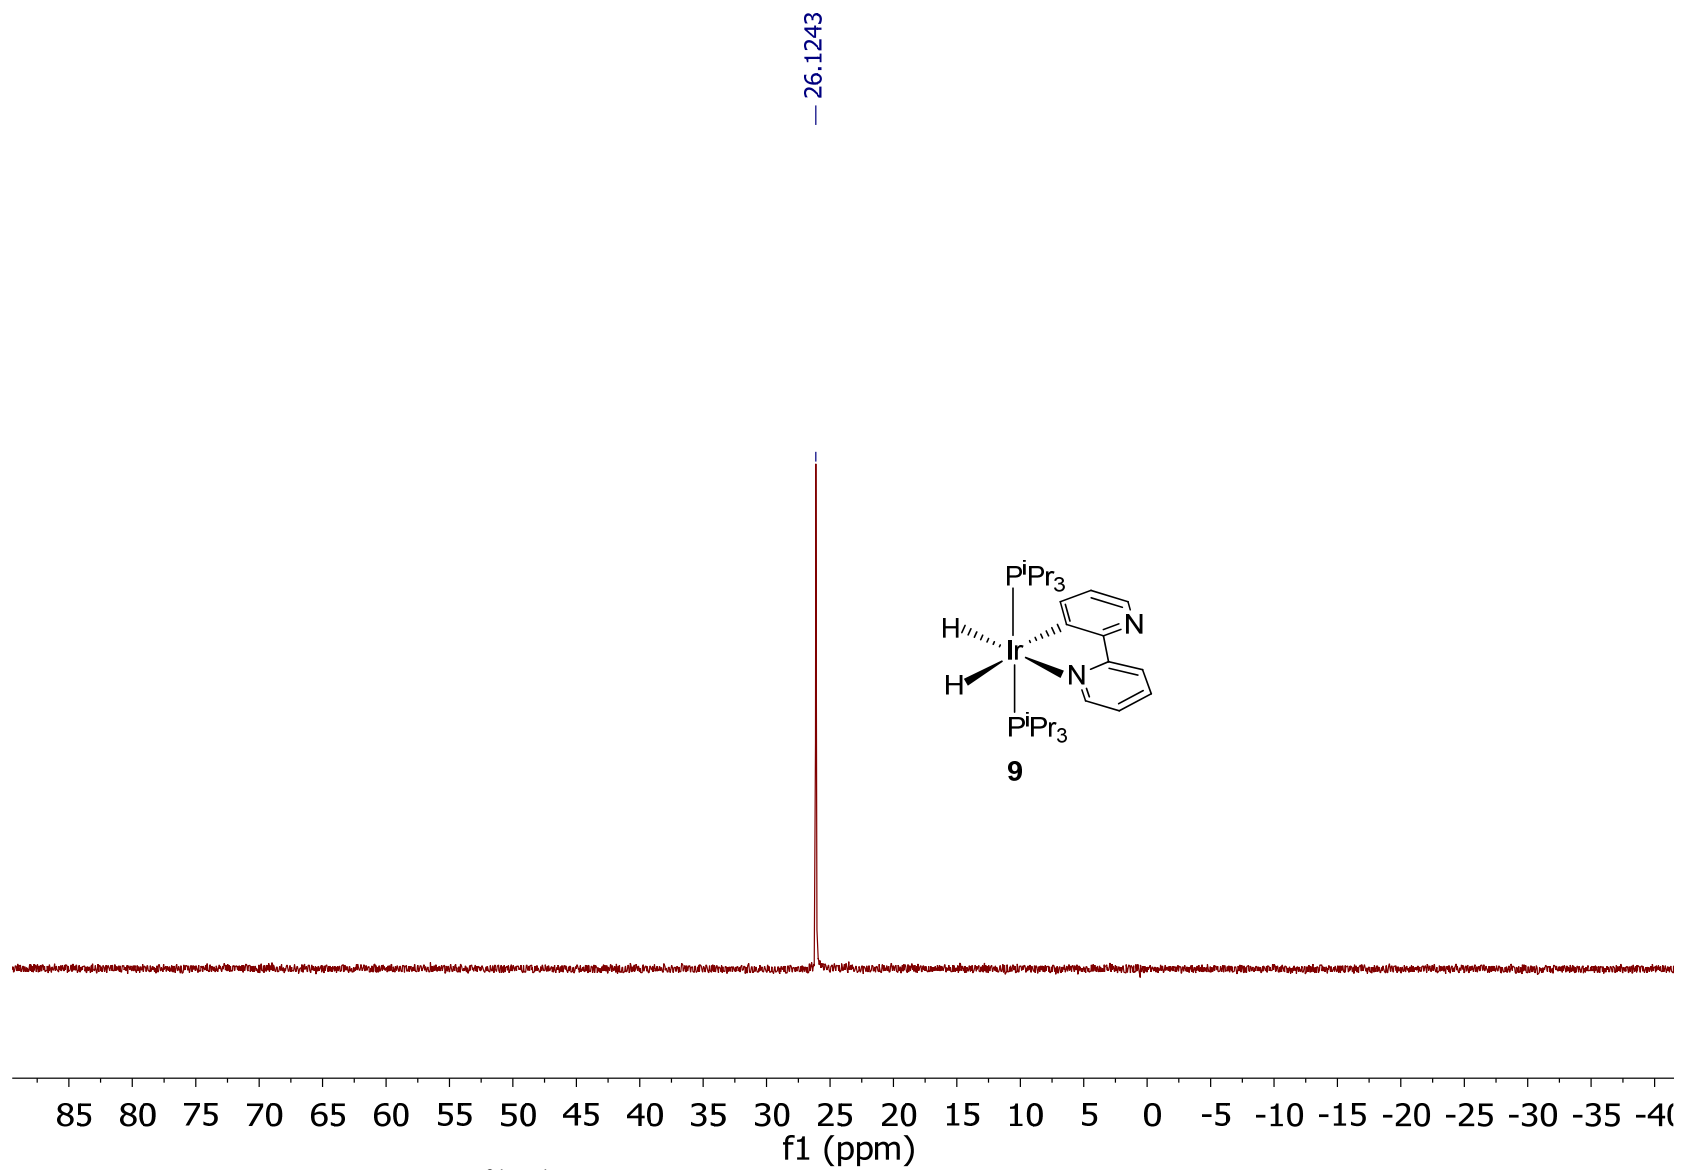

**Figure S32.**  $^{31}\text{P}\{^1\text{H}\}$  NMR spectrum (121.49 MHz  $\text{C}_6\text{D}_6$ , 298 K) of compound **9**.



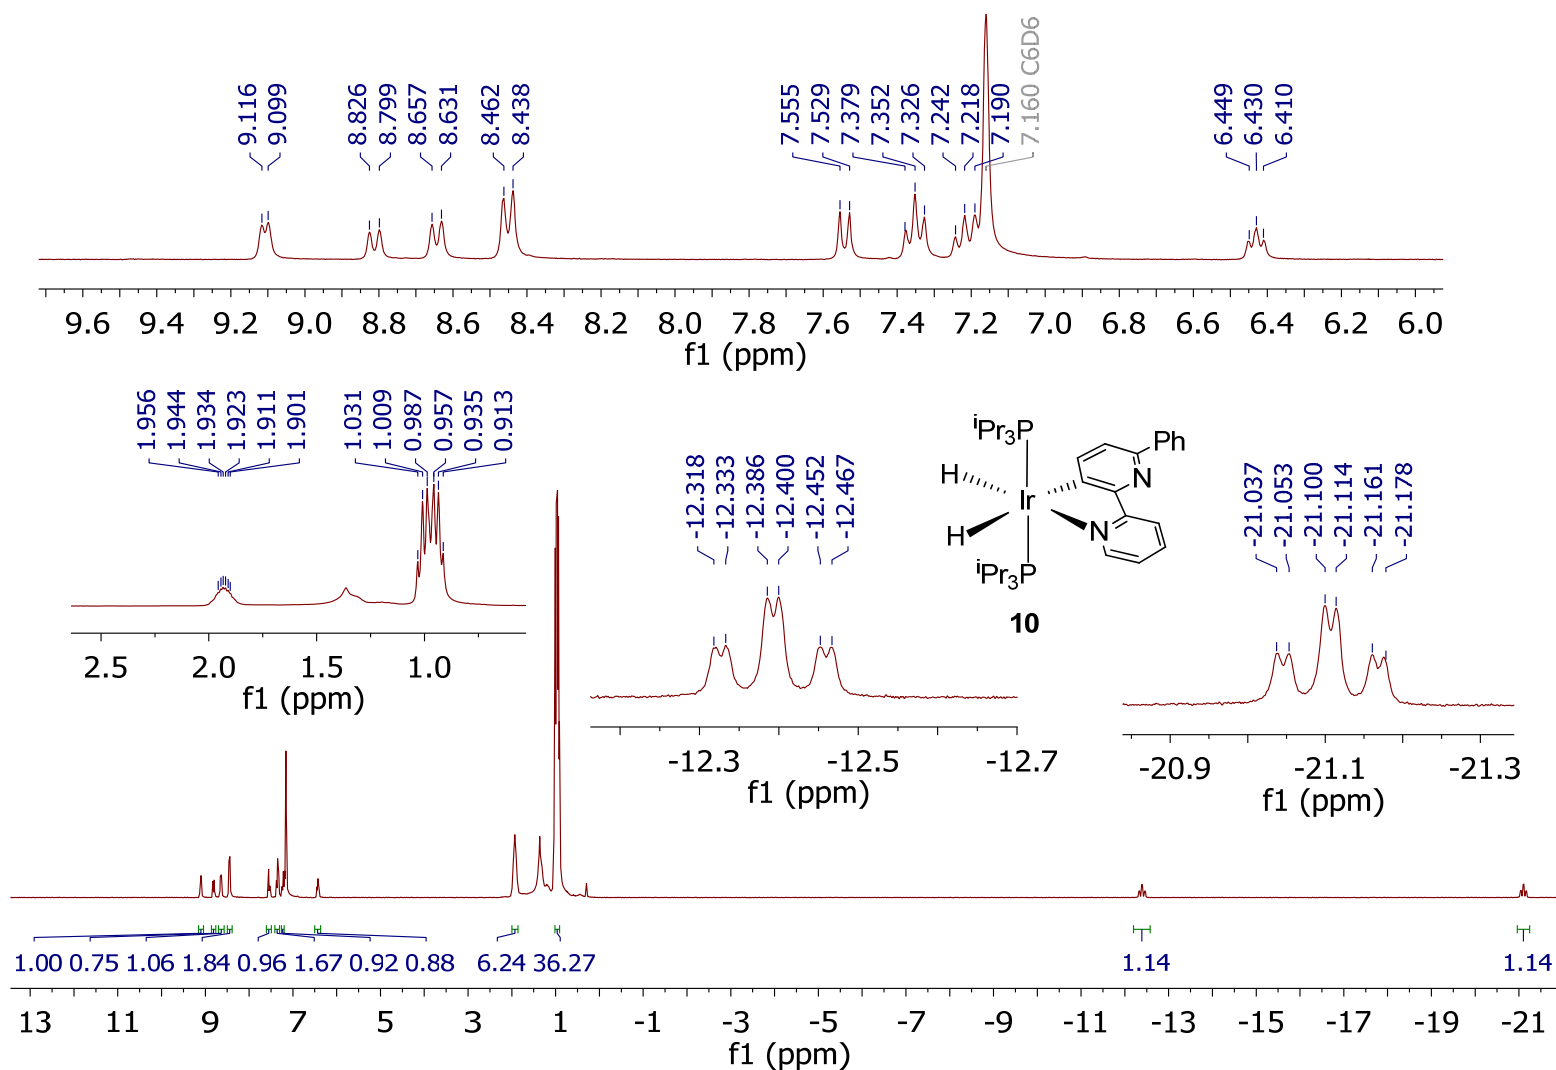

**Figure S34.**  $^1\text{H}$  NMR spectrum (300.13 MHz,  $\text{C}_6\text{D}_6$ , 298 K) of compound **10**.

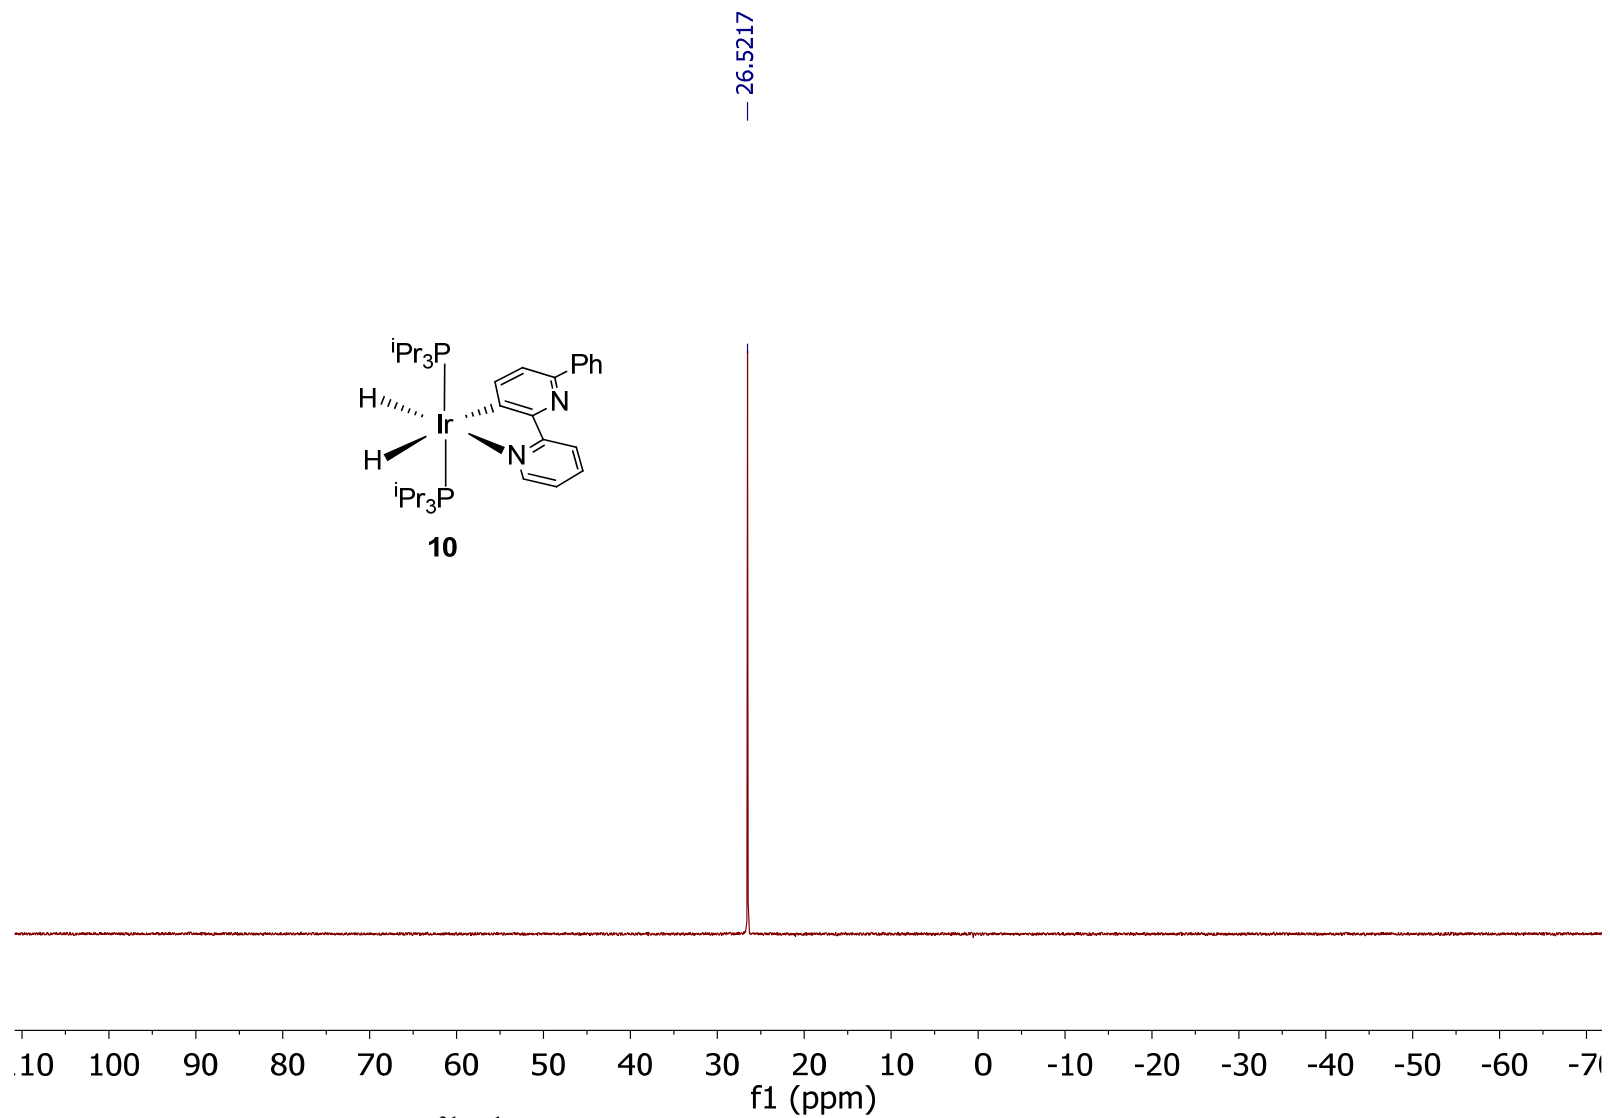

**Figure S35.**  $^{31}\text{P}\{^1\text{H}\}$  NMR spectrum (121.49 MHz,  $\text{C}_6\text{D}_6$ , 298 K) of compound **10**.



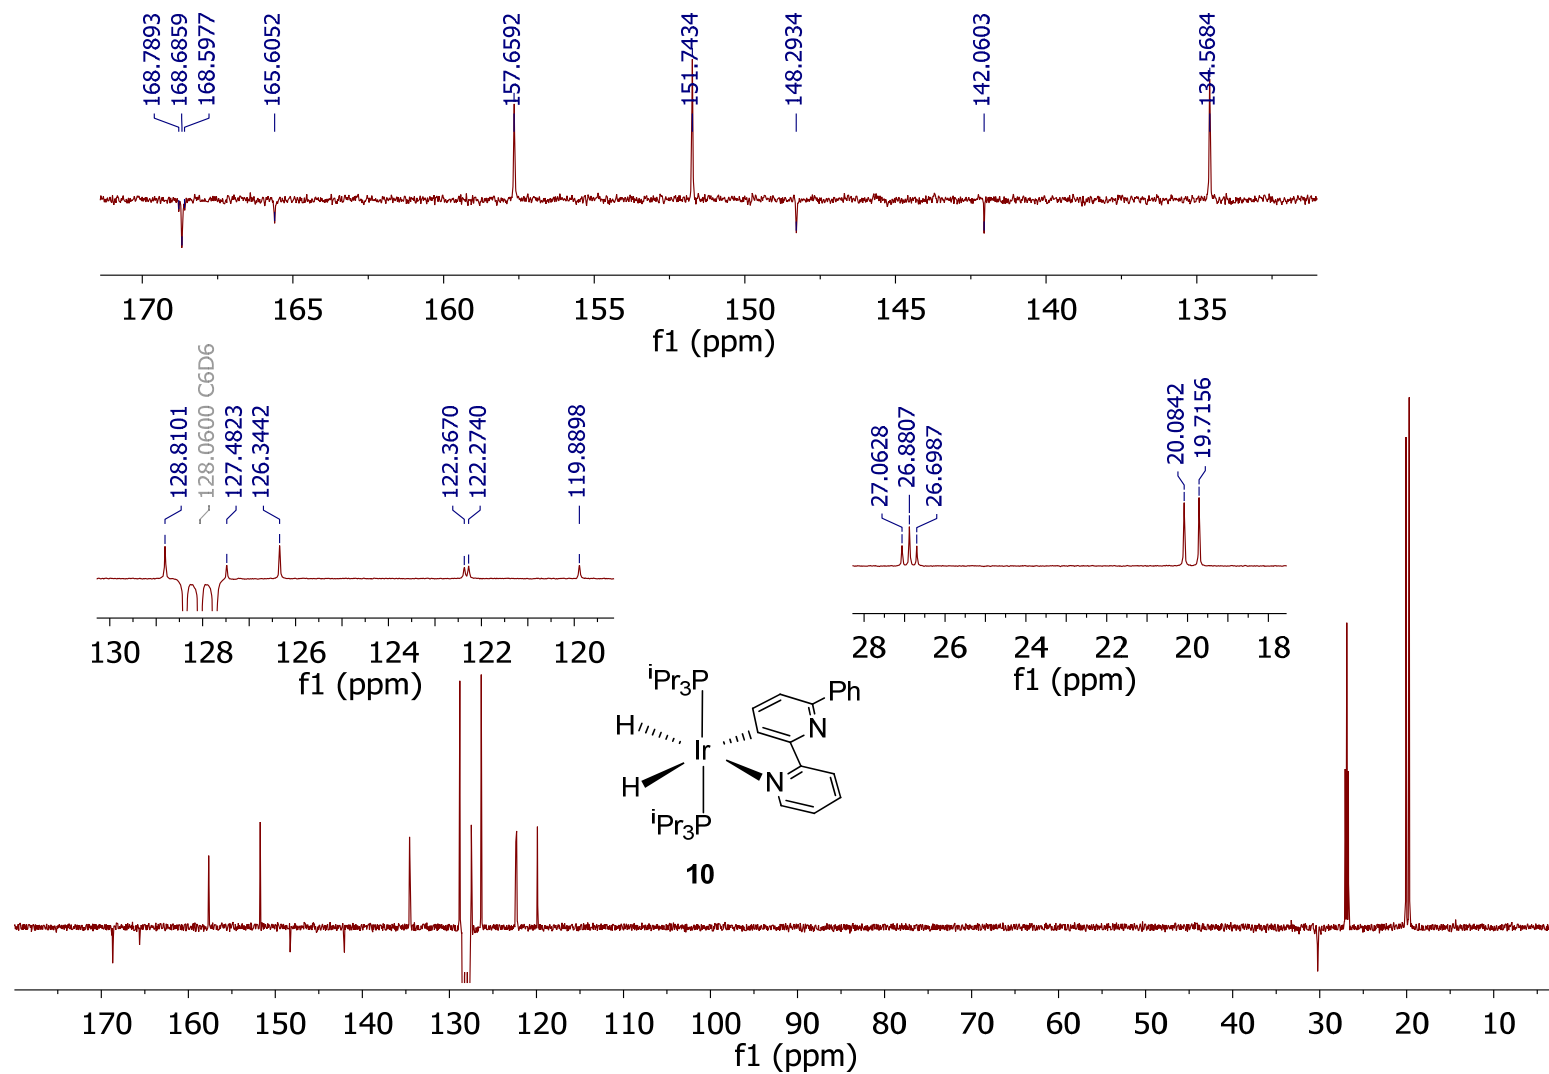

**Figure S36.**  $^{13}\text{C}\{^1\text{H}\}$ -apt NMR spectrum (75.48 MHz, C<sub>6</sub>D<sub>6</sub>, 298 K) of compound **10**.

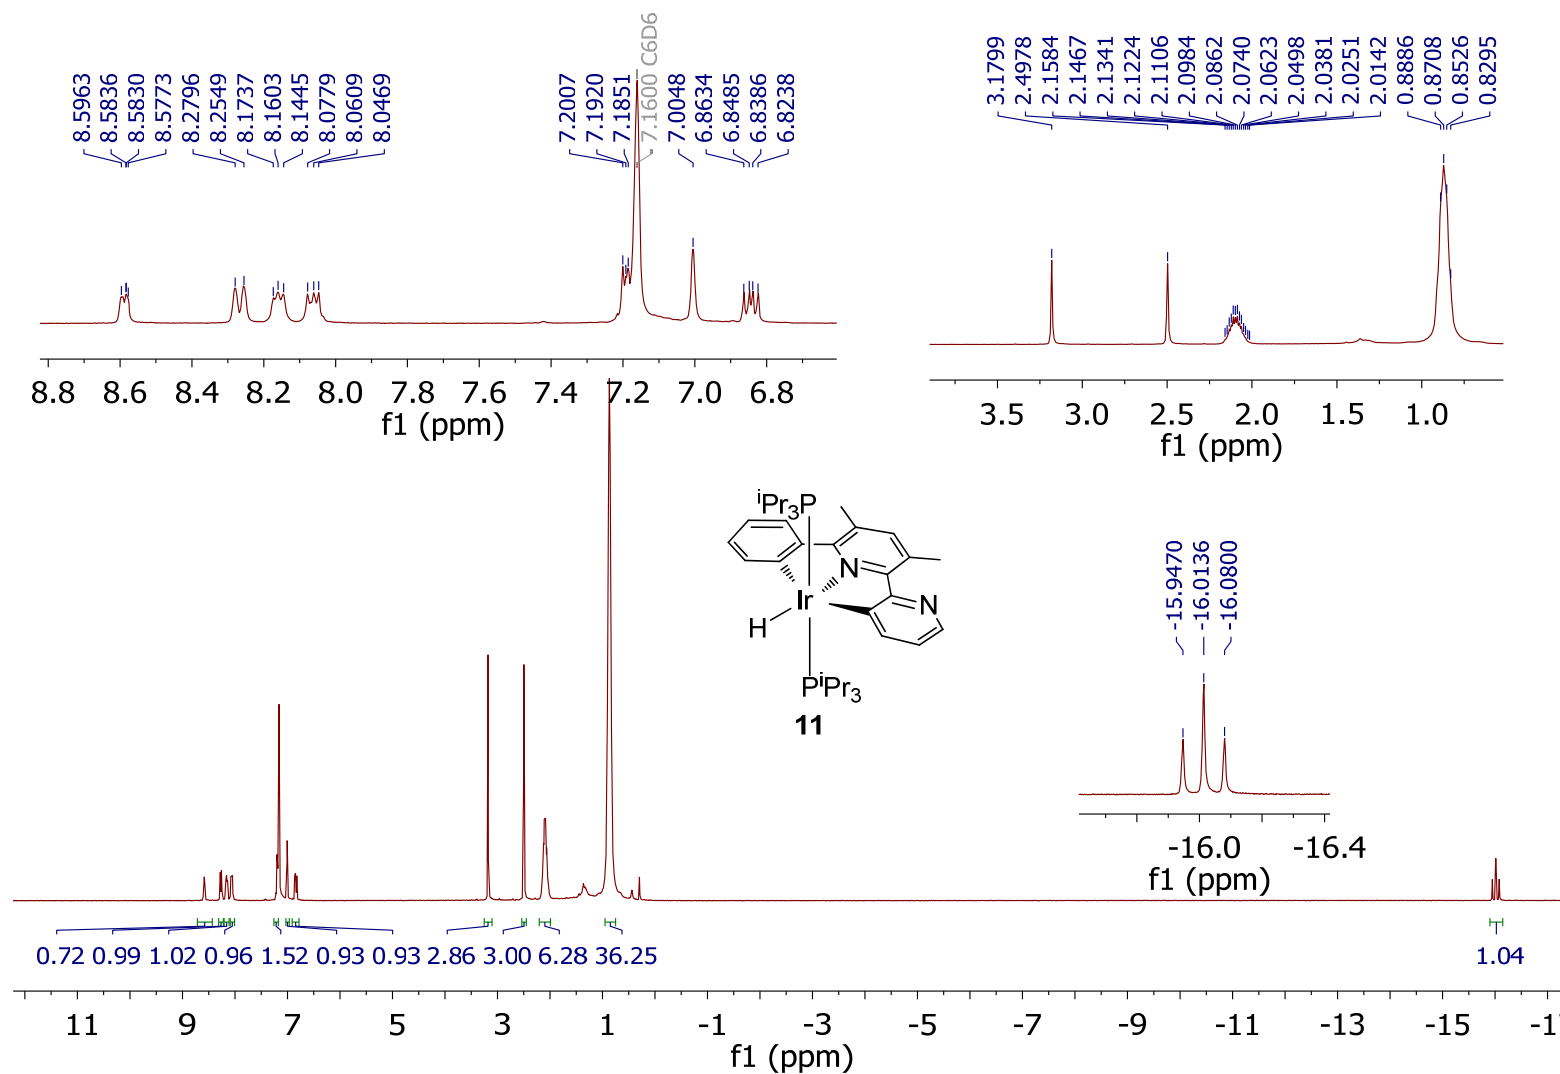

**Figure S37.** <sup>1</sup>H NMR spectrum (300.13 MHz, C<sub>6</sub>D<sub>6</sub>, 298 K) of compound **11**.

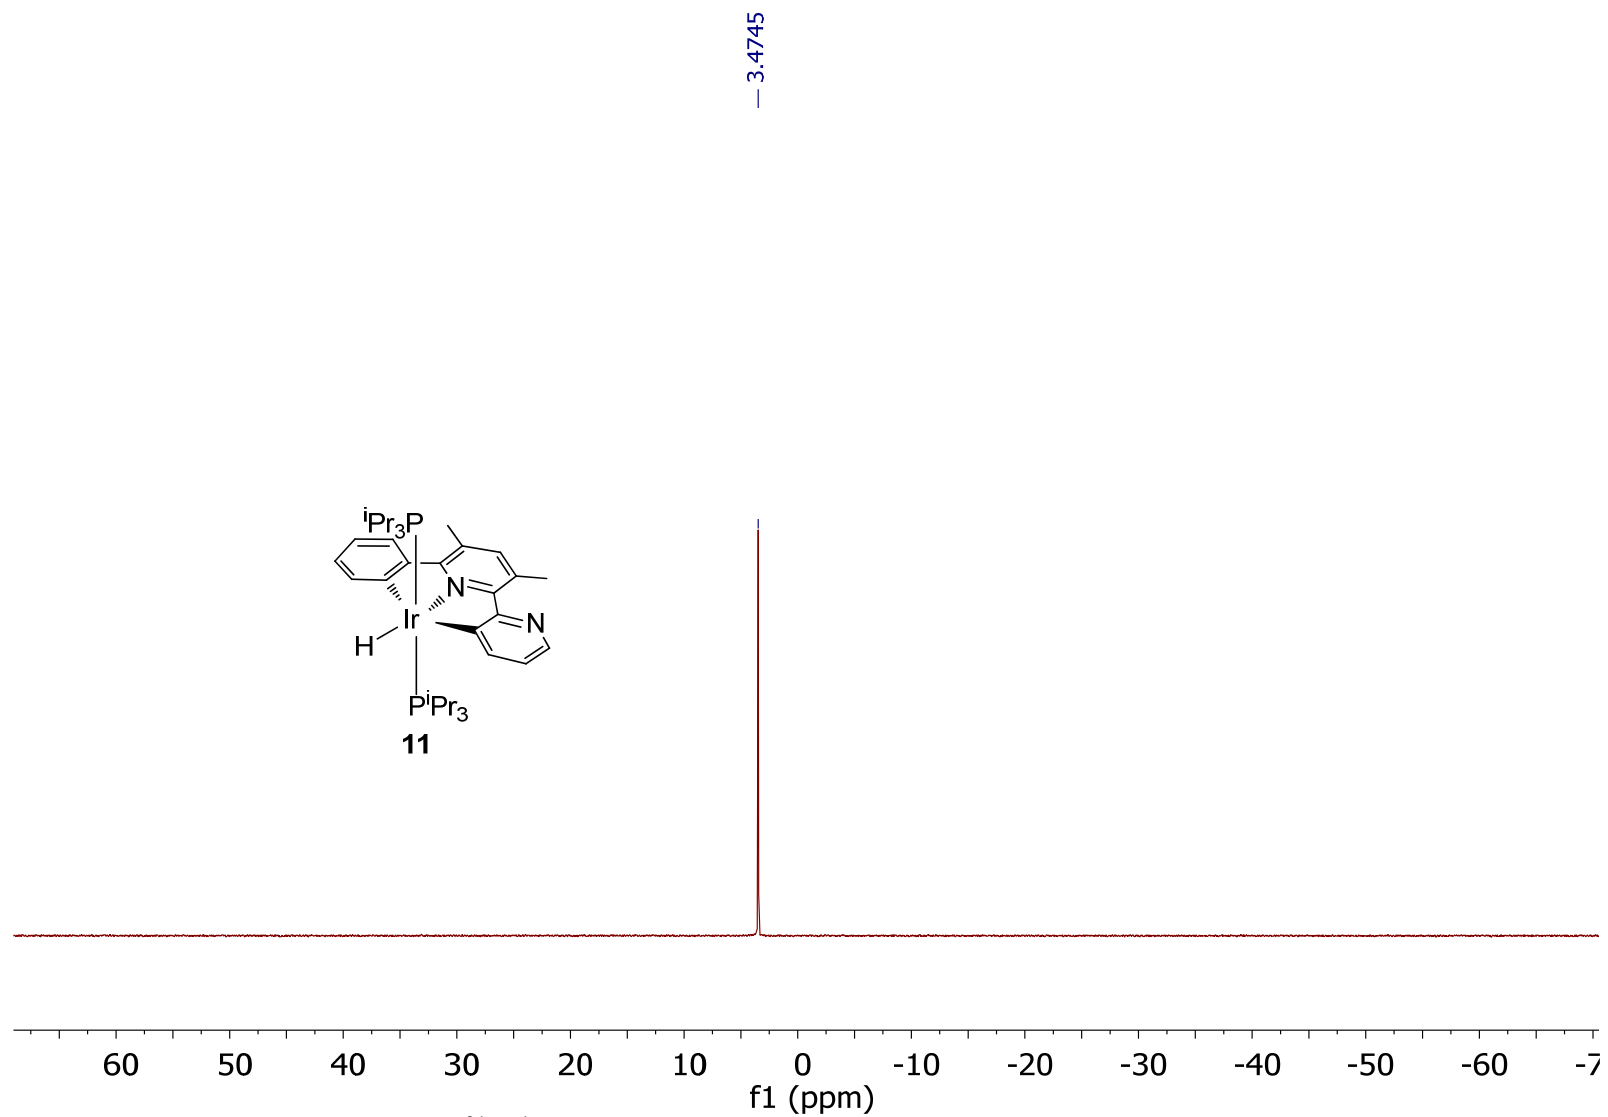

**Figure S38.**  $^{31}\text{P}\{^1\text{H}\}$  NMR spectrum (121.49 MHz,  $\text{C}_6\text{D}_6$ , 298 K) of compound **11**.

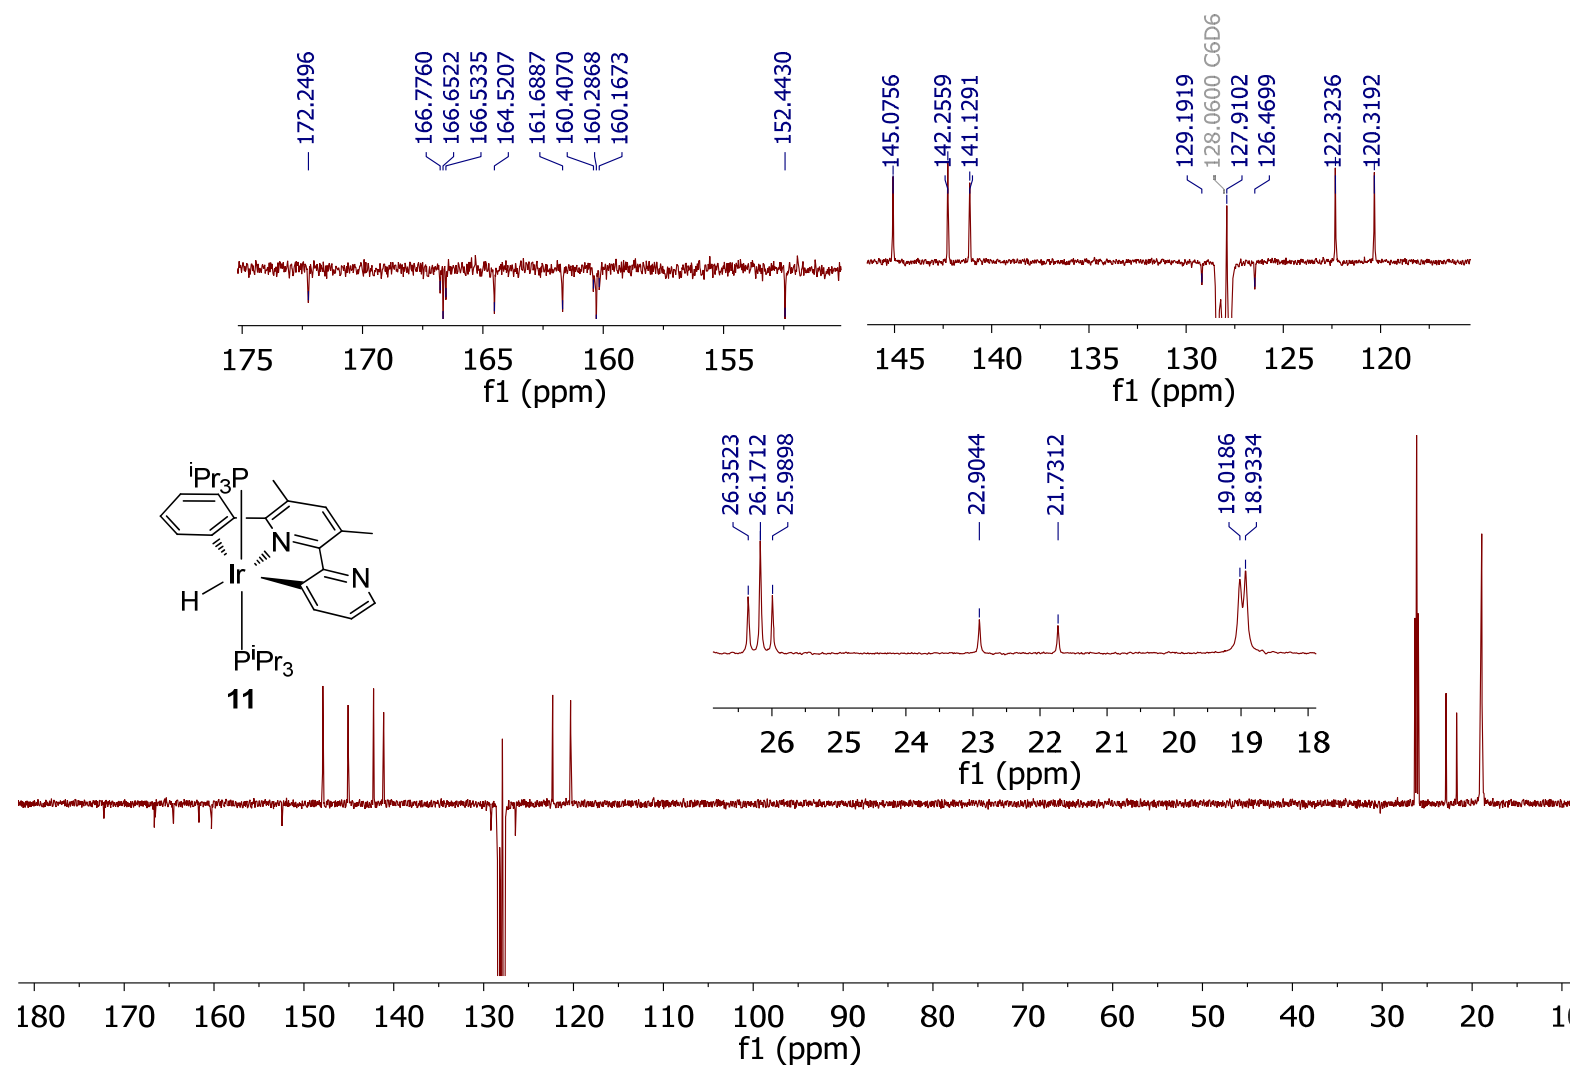

**Figure S39.**  $^{13}\text{C}\{^1\text{H}\}$ -apt NMR spectrum (75.48 MHz,  $\text{C}_6\text{D}_6$ , 298 K) of compound **11**.

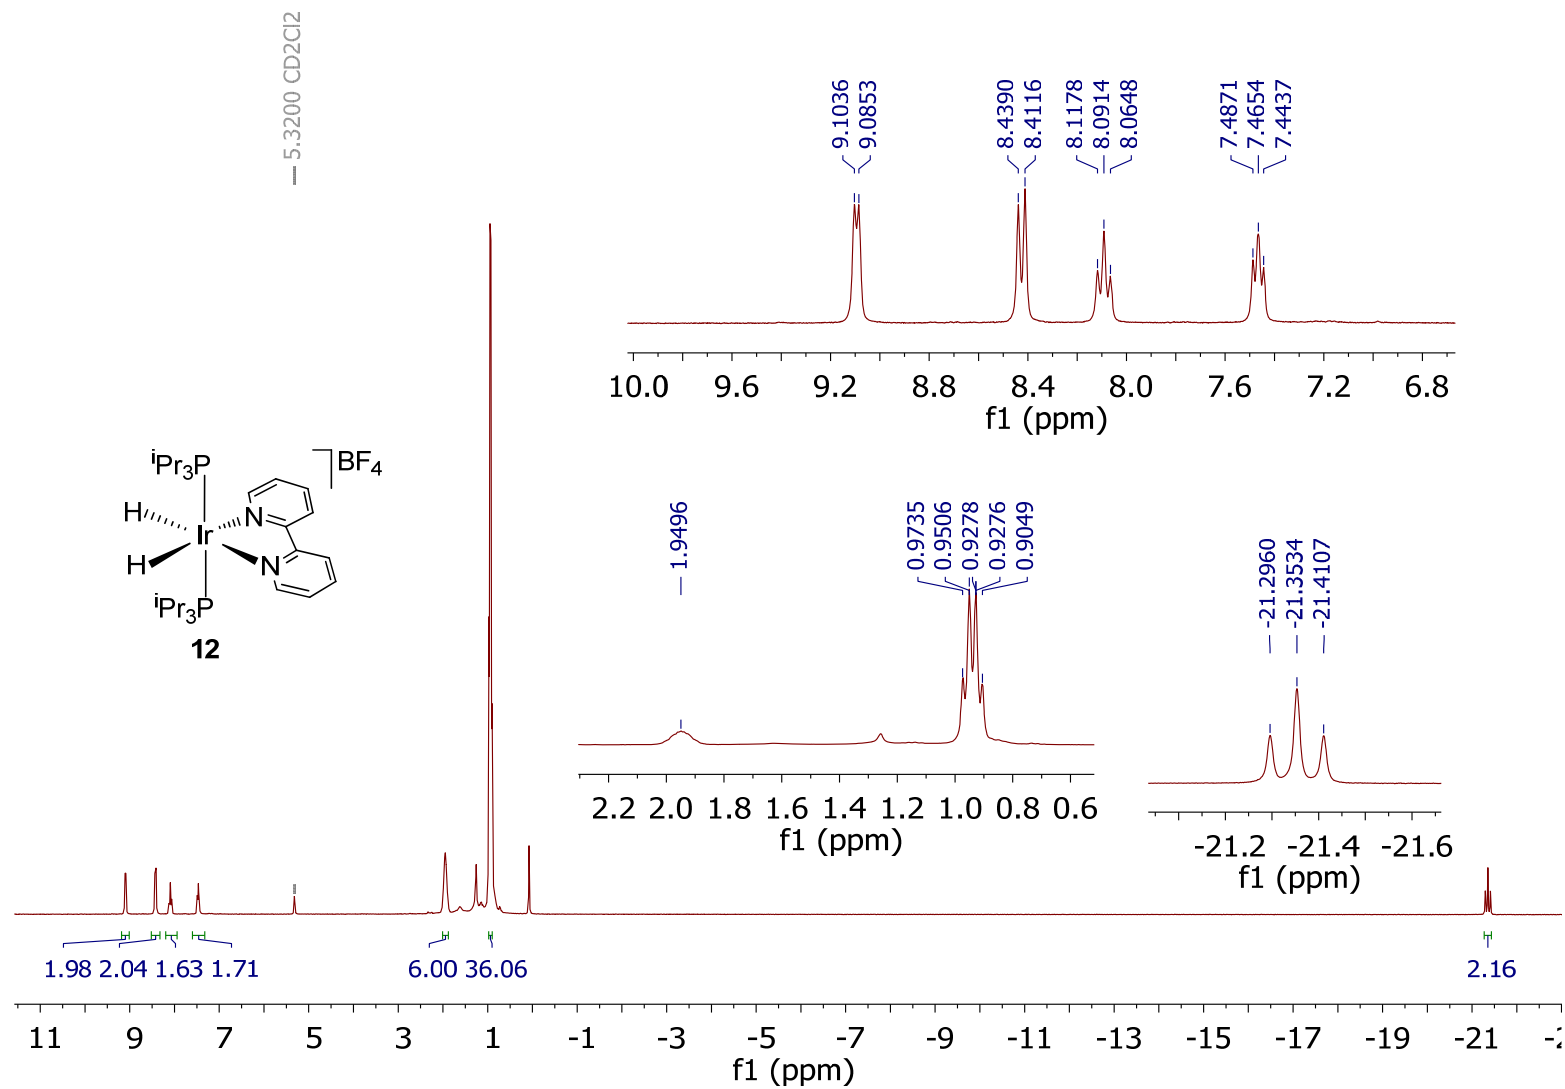

**Figure S40.** <sup>1</sup>H NMR spectrum (300.13 MHz, CD<sub>2</sub>Cl<sub>2</sub>, 298 K) of compound **12**.

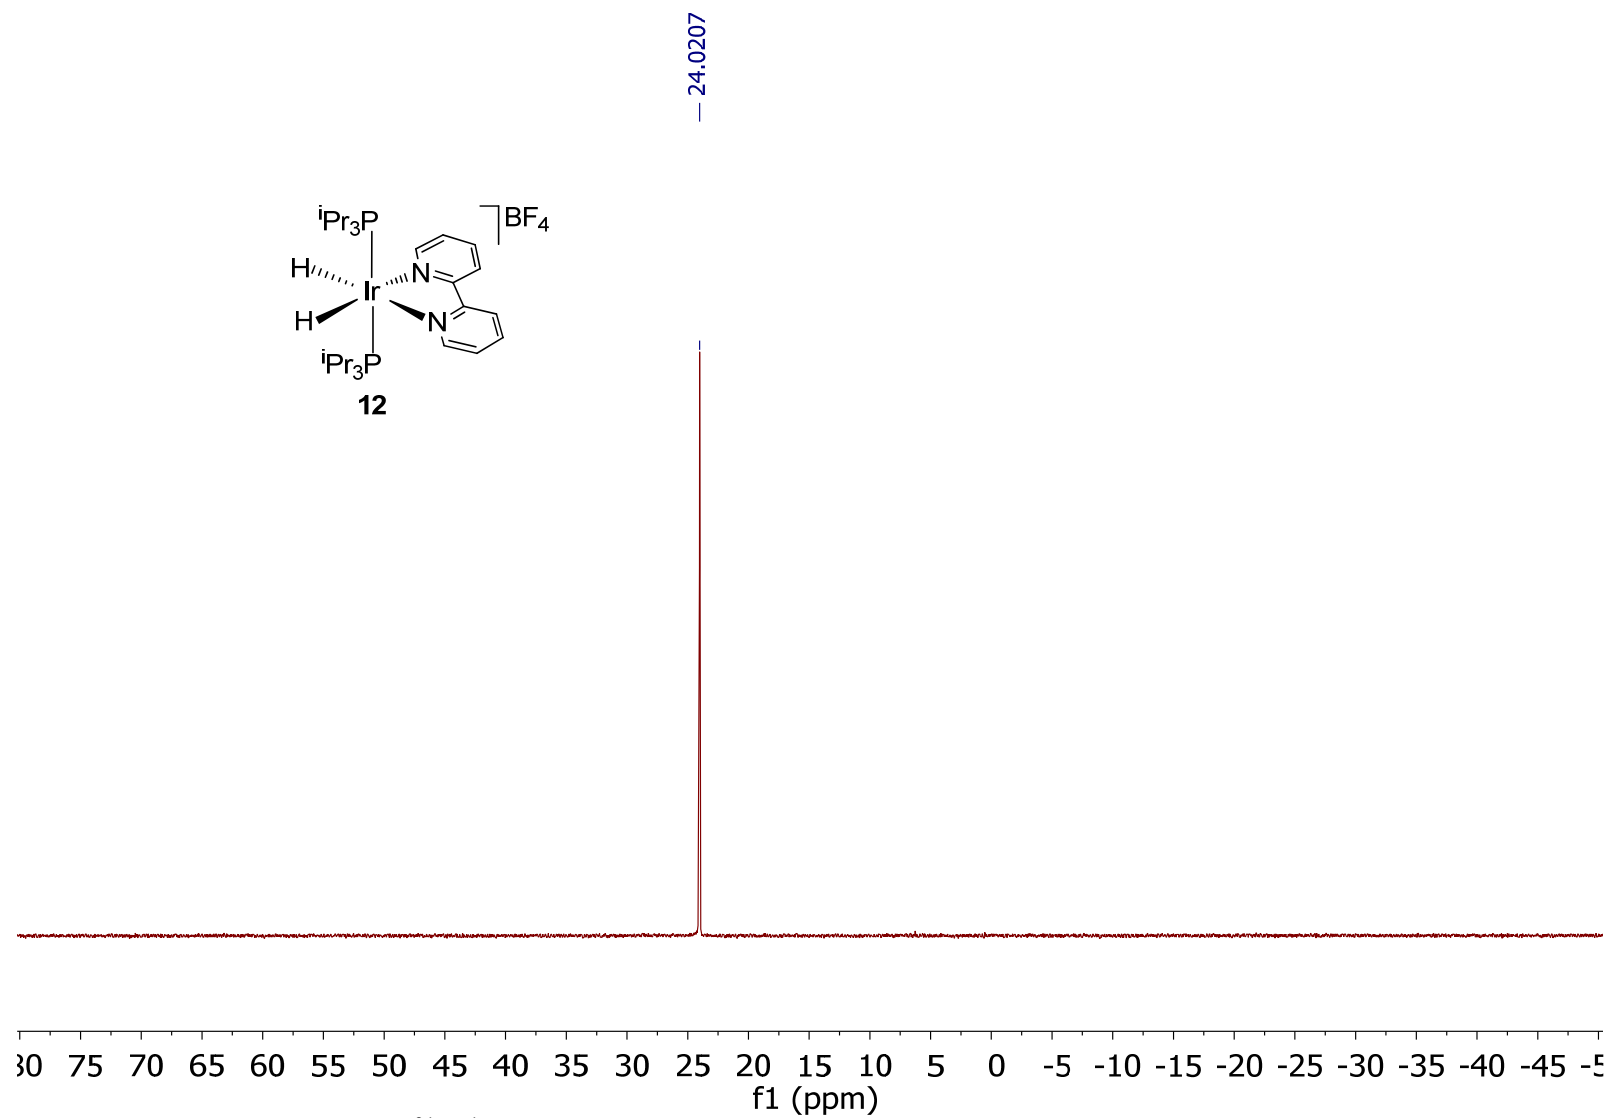

**Figure S41.**  $^{31}\text{P}\{^1\text{H}\}$  NMR spectrum (121.49 MHz,  $\text{CD}_2\text{Cl}_2$ , 298 K) of compound **12**.

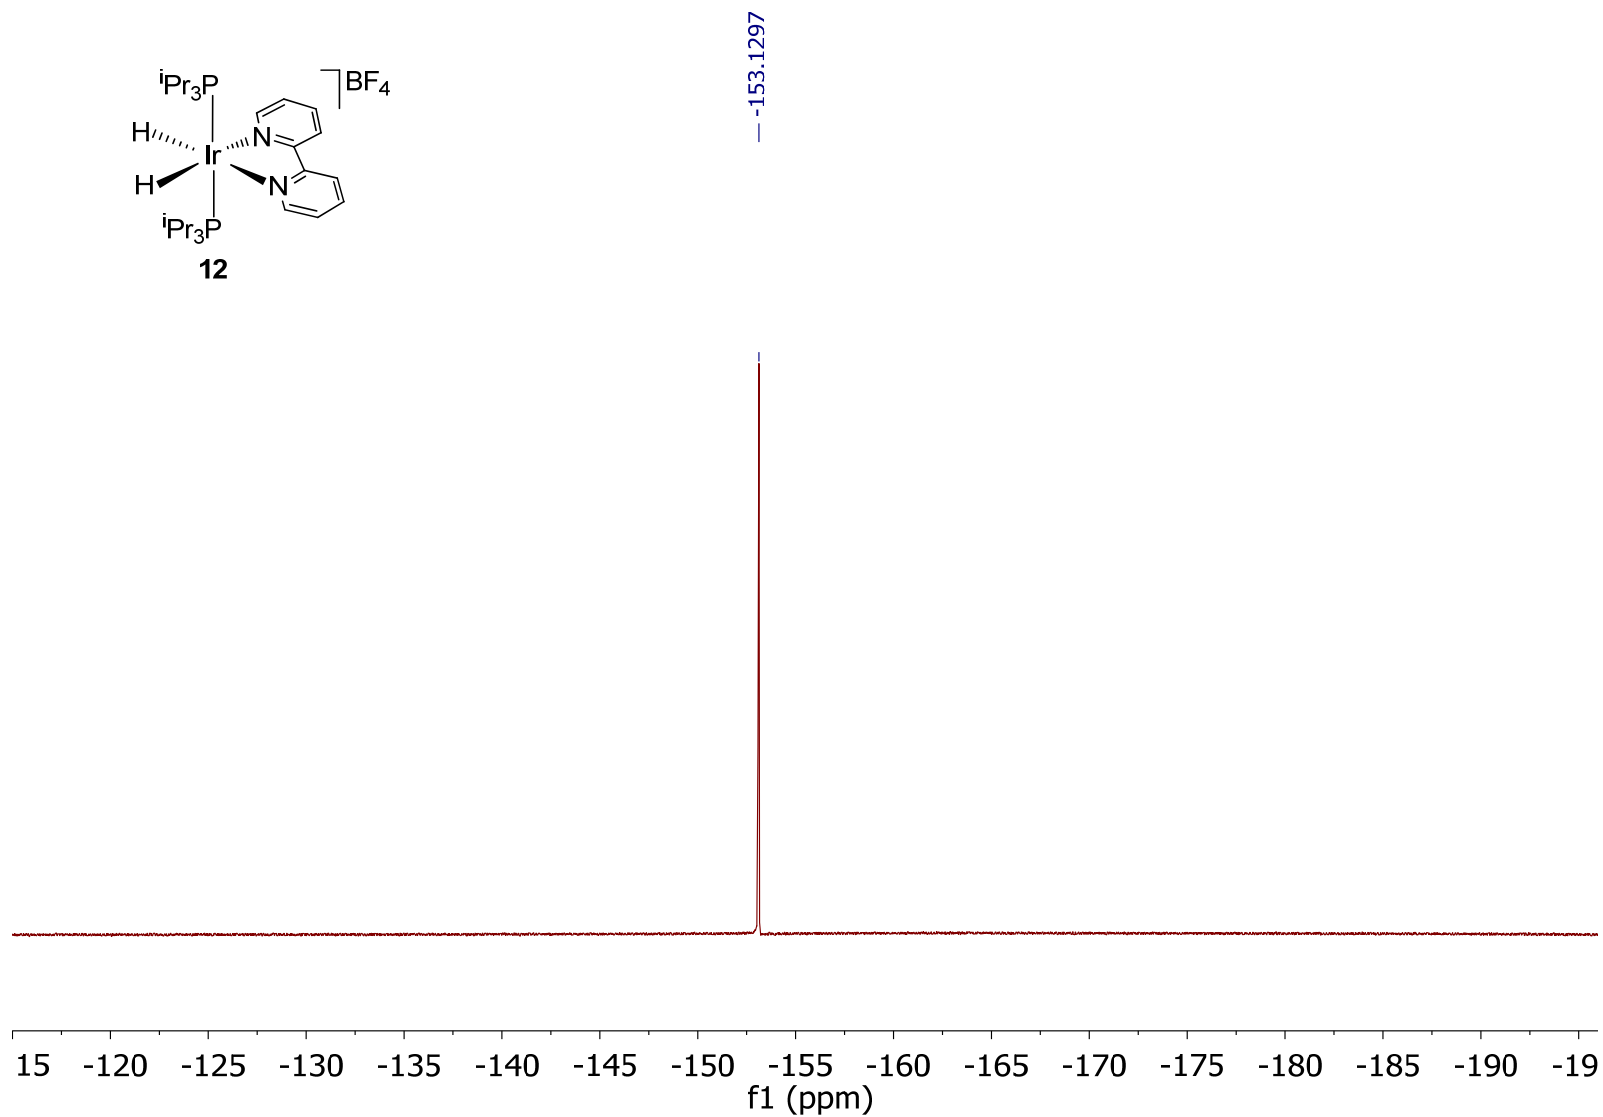

**Figure S42.**  $^{19}\text{F}\{^1\text{H}\}$  NMR spectrum (376.49 MHz,  $\text{CD}_2\text{Cl}_2$ , 298 K) of compound **12**.

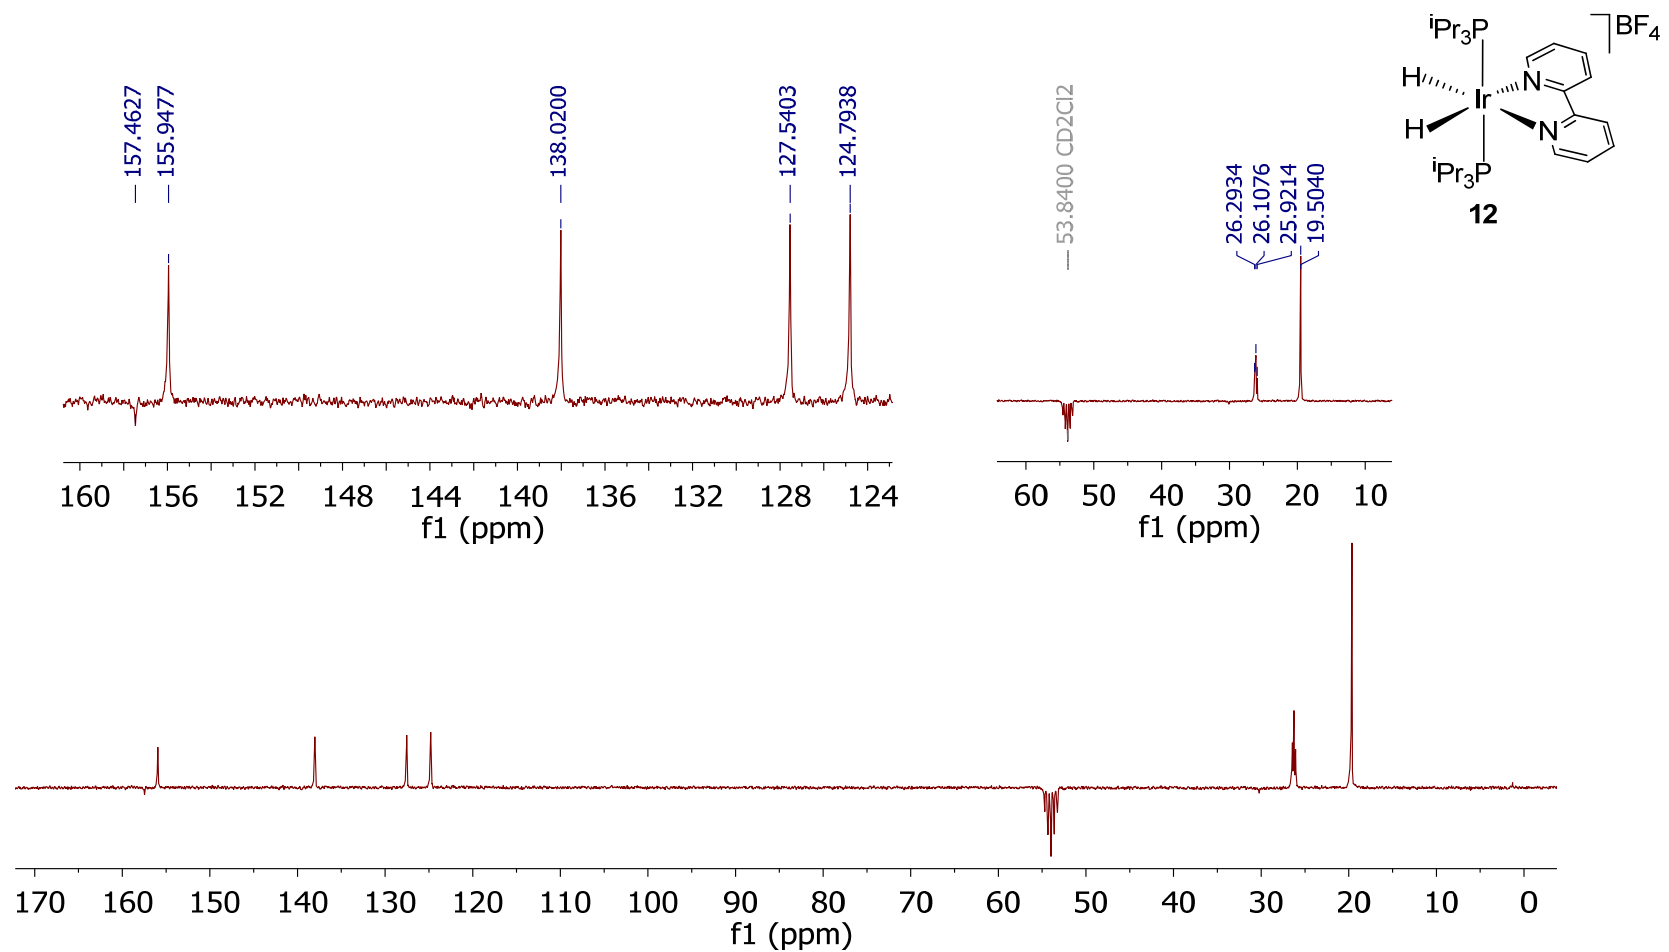

**Figure S43.**  $^{13}\text{C}\{^1\text{H}\}$ -apt NMR spectrum (75.48 MHz,  $\text{CD}_2\text{Cl}_2$ , 298 K) of compound **12**.



• Deuteration Experiments

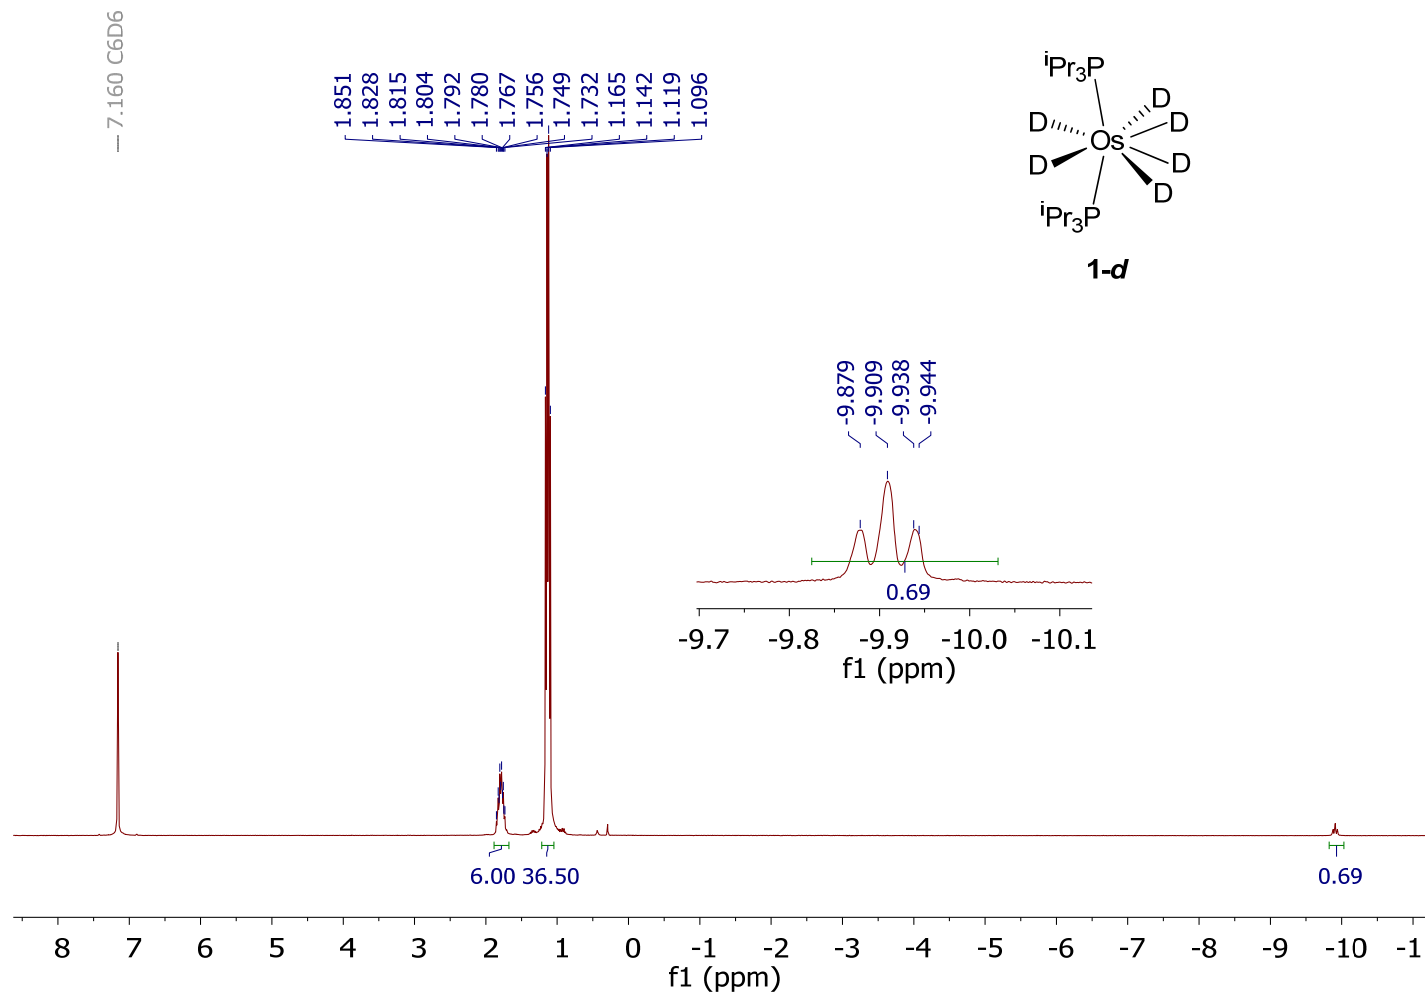

**Figure S44.**  $^1H$  NMR spectrum (300.13 MHz,  $C_6D_6$ , 298 K) of compound **1-d**. A delay (d1) of 5 seconds was used in order to assure the correct integration of the resonances.

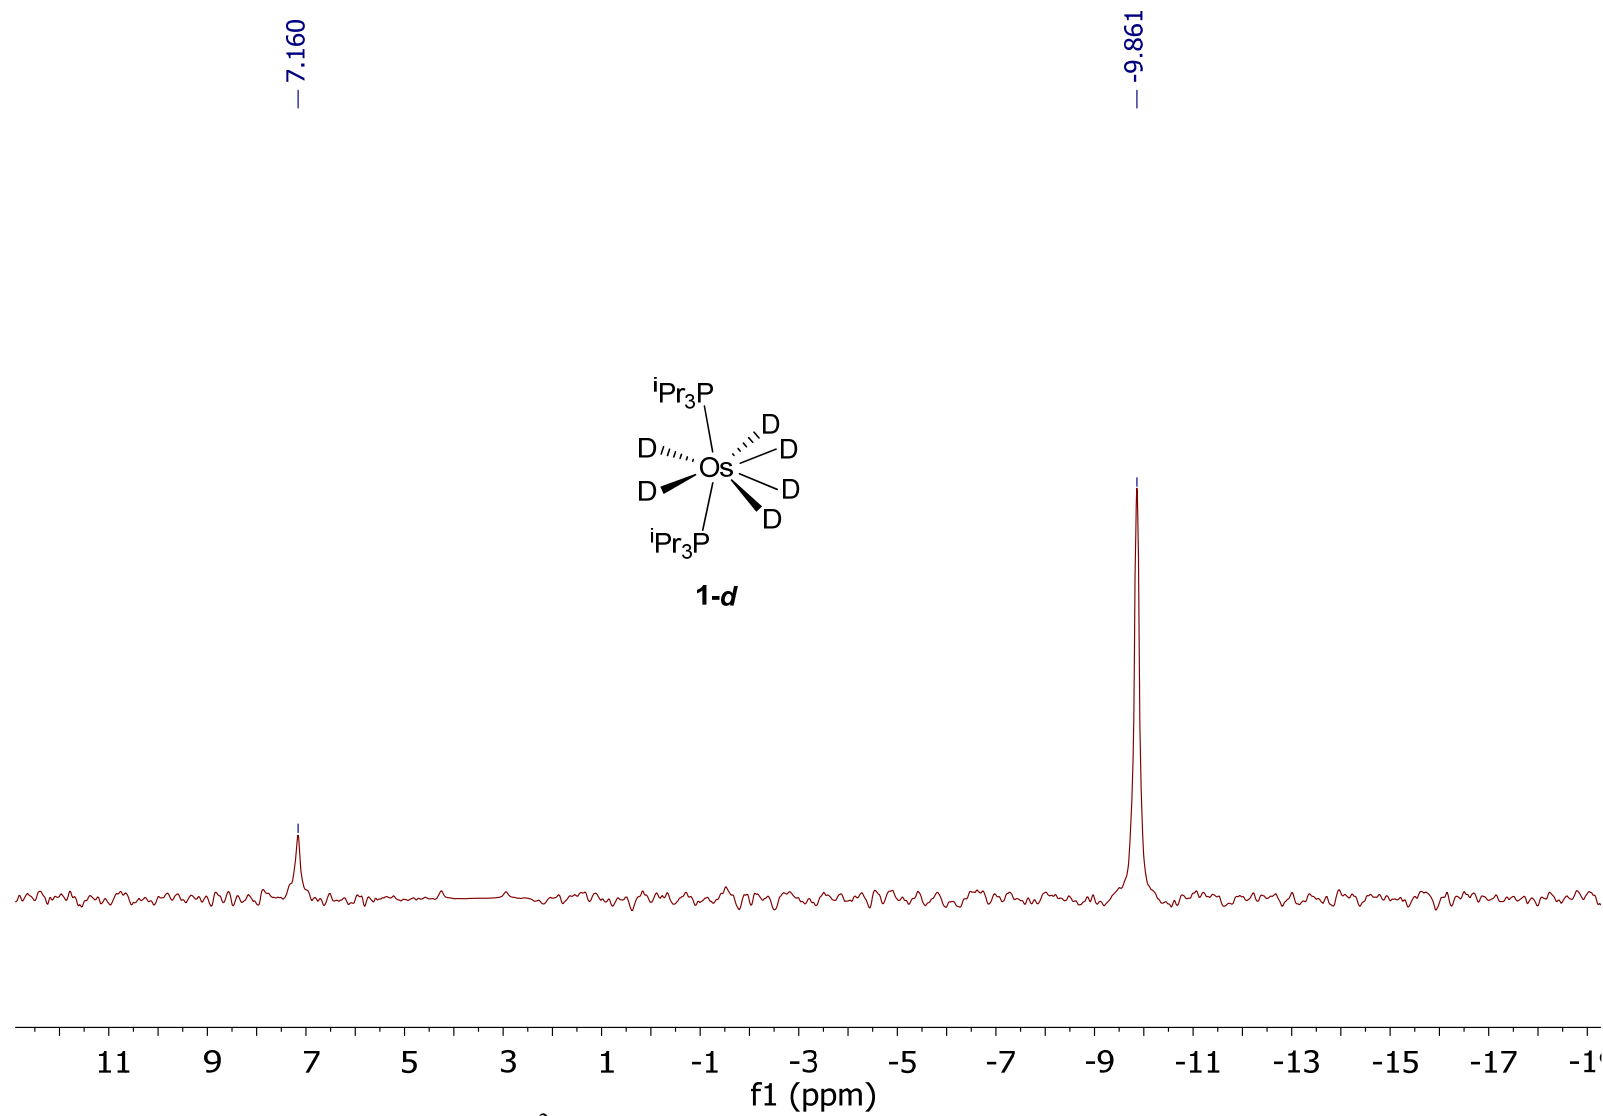

**Figure S45.**  $^2\text{H}$  NMR (61.42 MHz,  $\text{C}_6\text{H}_6$ , 298 K) of compound **1-d**.

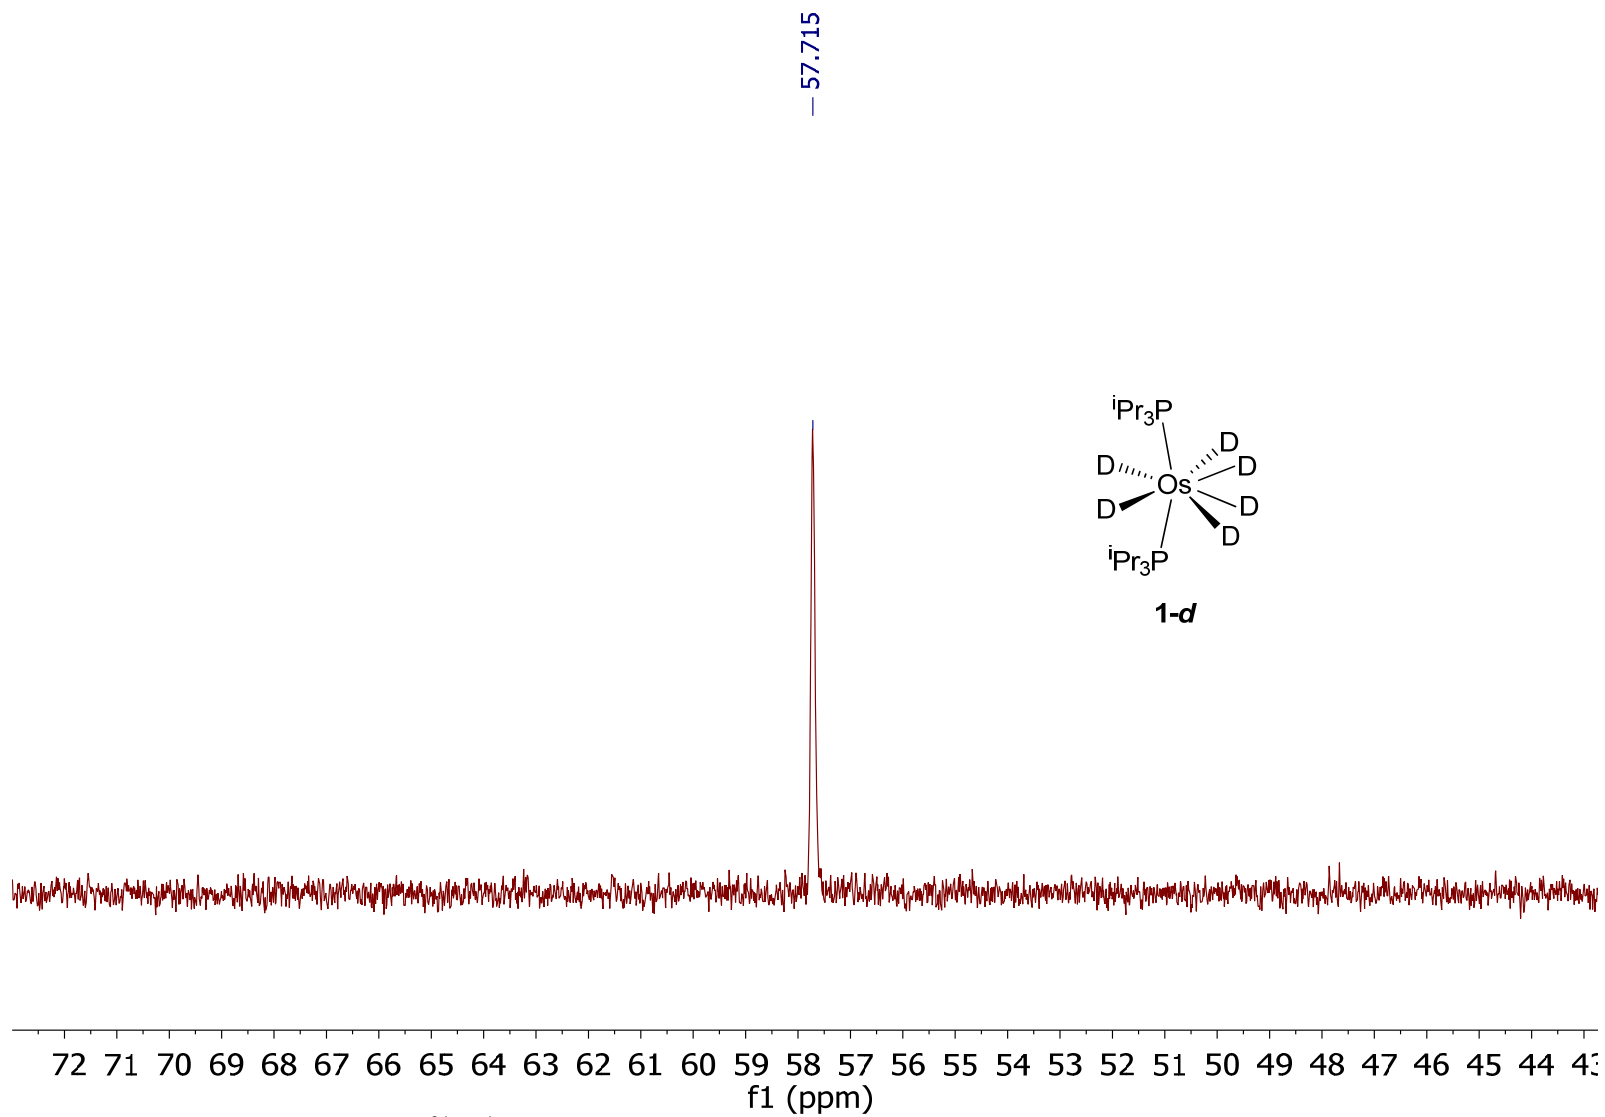

**Figure S46.**  $^{31}\text{P}\{^1\text{H}\}$  NMR spectrum (121.49 MHz,  $\text{C}_6\text{D}_6$ , 298 K) of compound **1-d**.



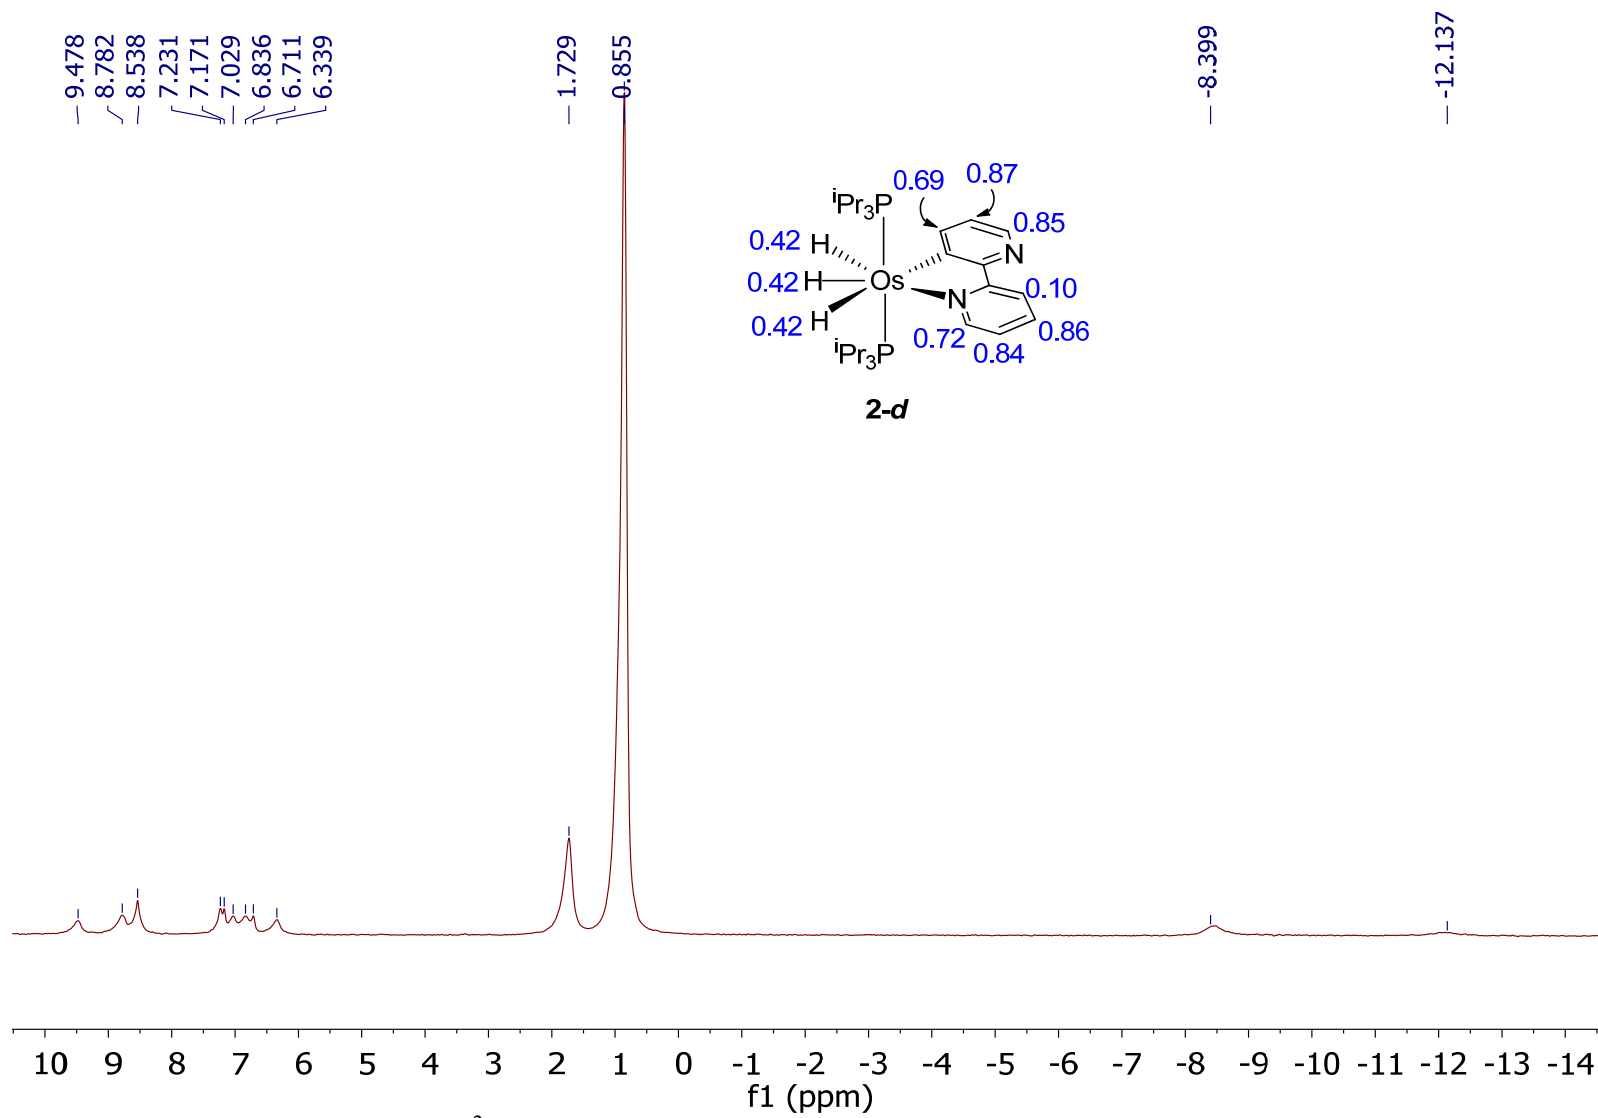

**Figure S48.**  $^2\text{H}$  NMR spectrum (61.42 MHz,  $\text{C}_6\text{H}_6$ , 298 K) of compound **2-d**.

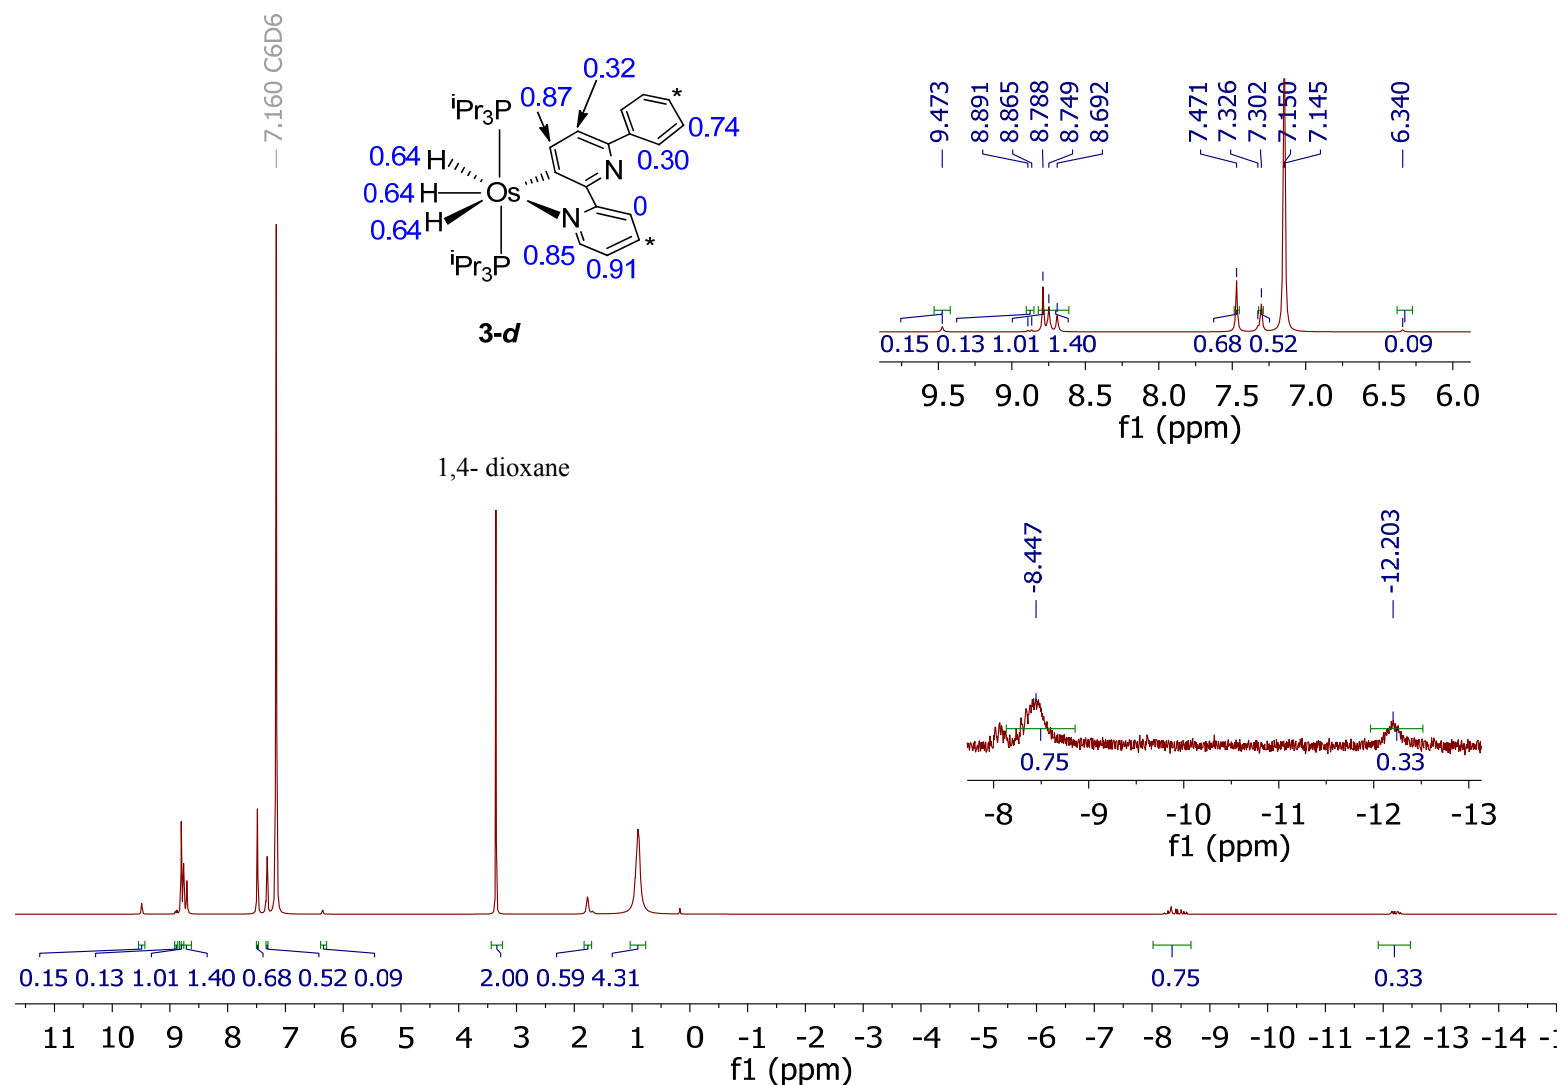

**Figure S49.**  $^1H$  NMR spectrum (300.13 MHz,  $C_6D_6$ , 298 K) of compound **3-d**. A delay (d1) of 5 seconds was used in order to assure the correct integration of the resonances.

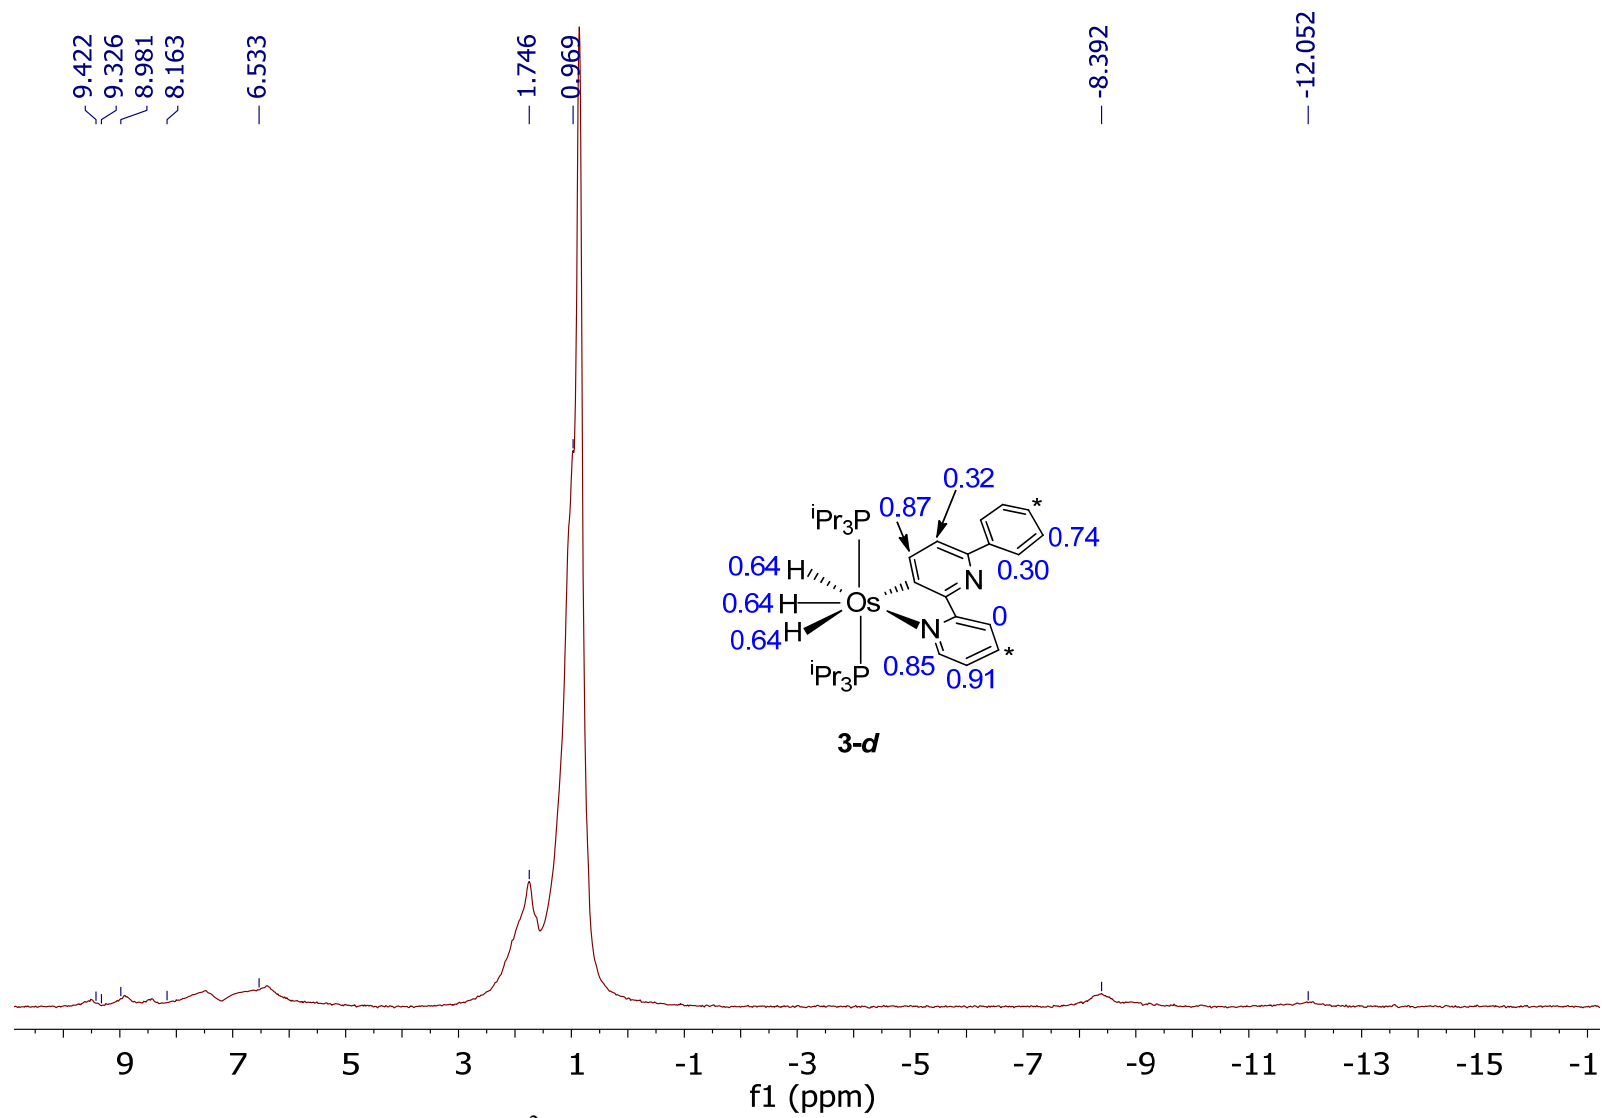

**Figure S50.**  $^2\text{H}$  NMR spectrum (61.42 MHz,  $\text{C}_6\text{H}_6$ , 298 K) of compound **3-d**.

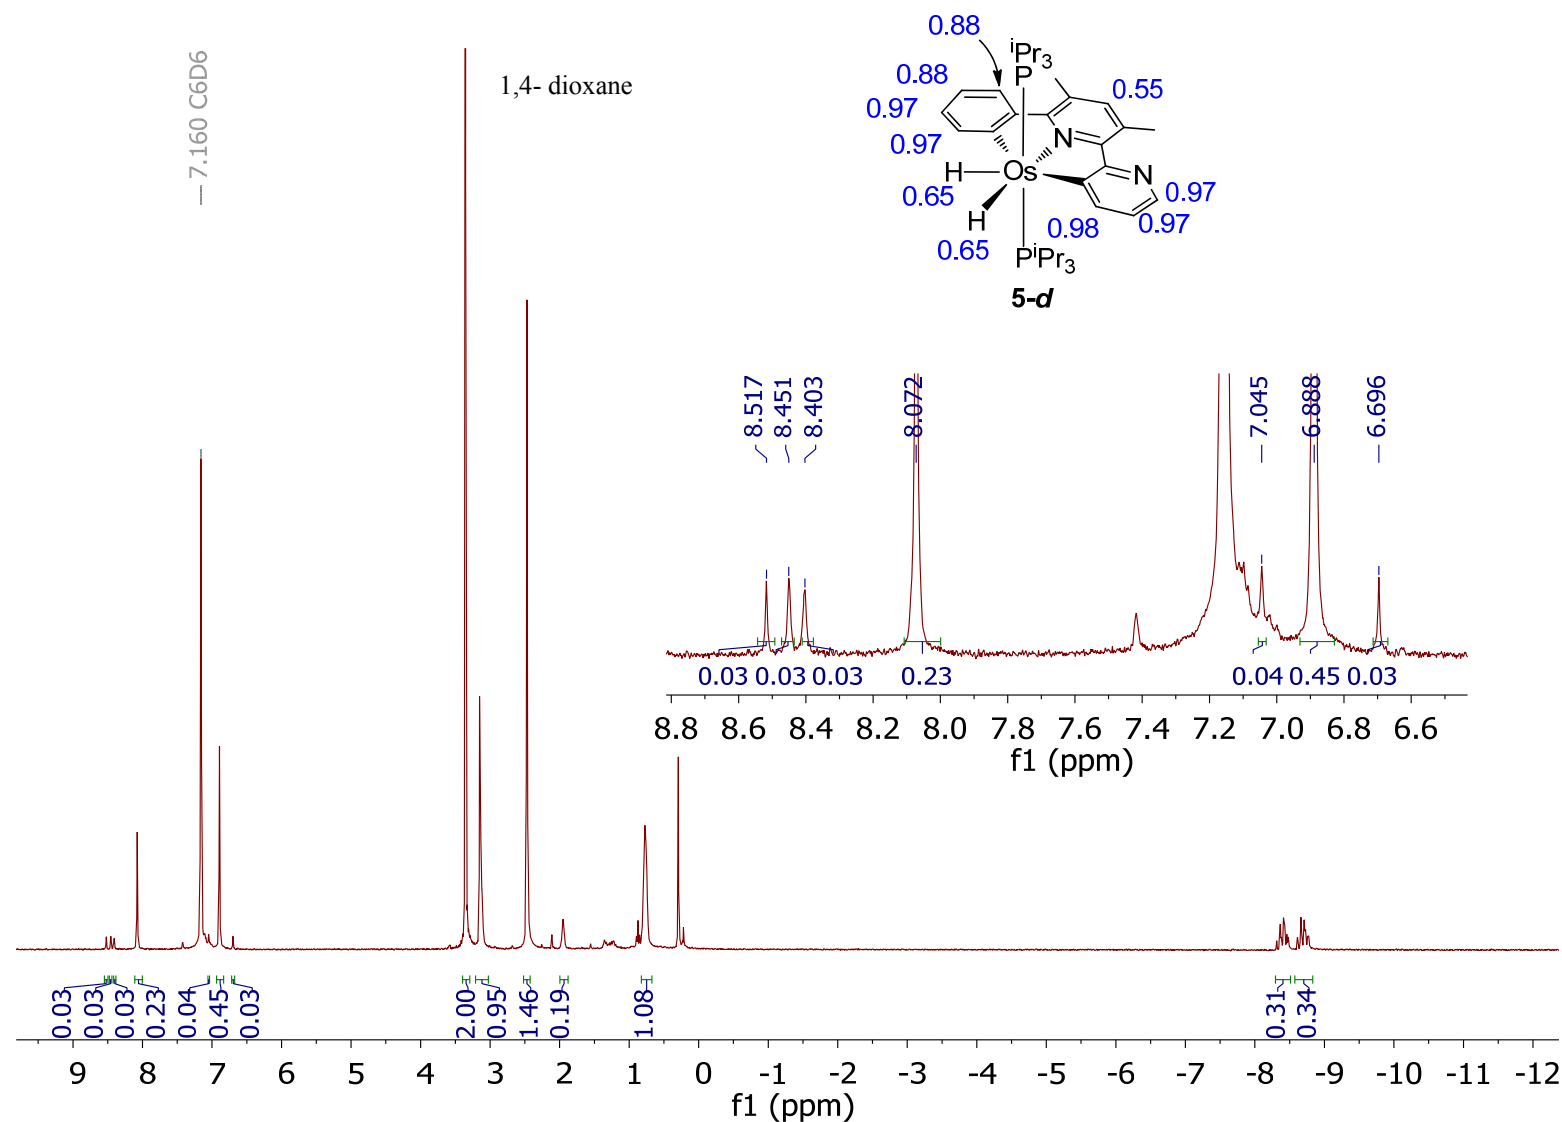

**Figure S51.** <sup>1</sup>H NMR spectrum (300.13 MHz, C<sub>6</sub>D<sub>6</sub>, 298 K) of compound **5-d**. A delay (d1) of 5 seconds was used in order to assure the correct integration of the resonances.



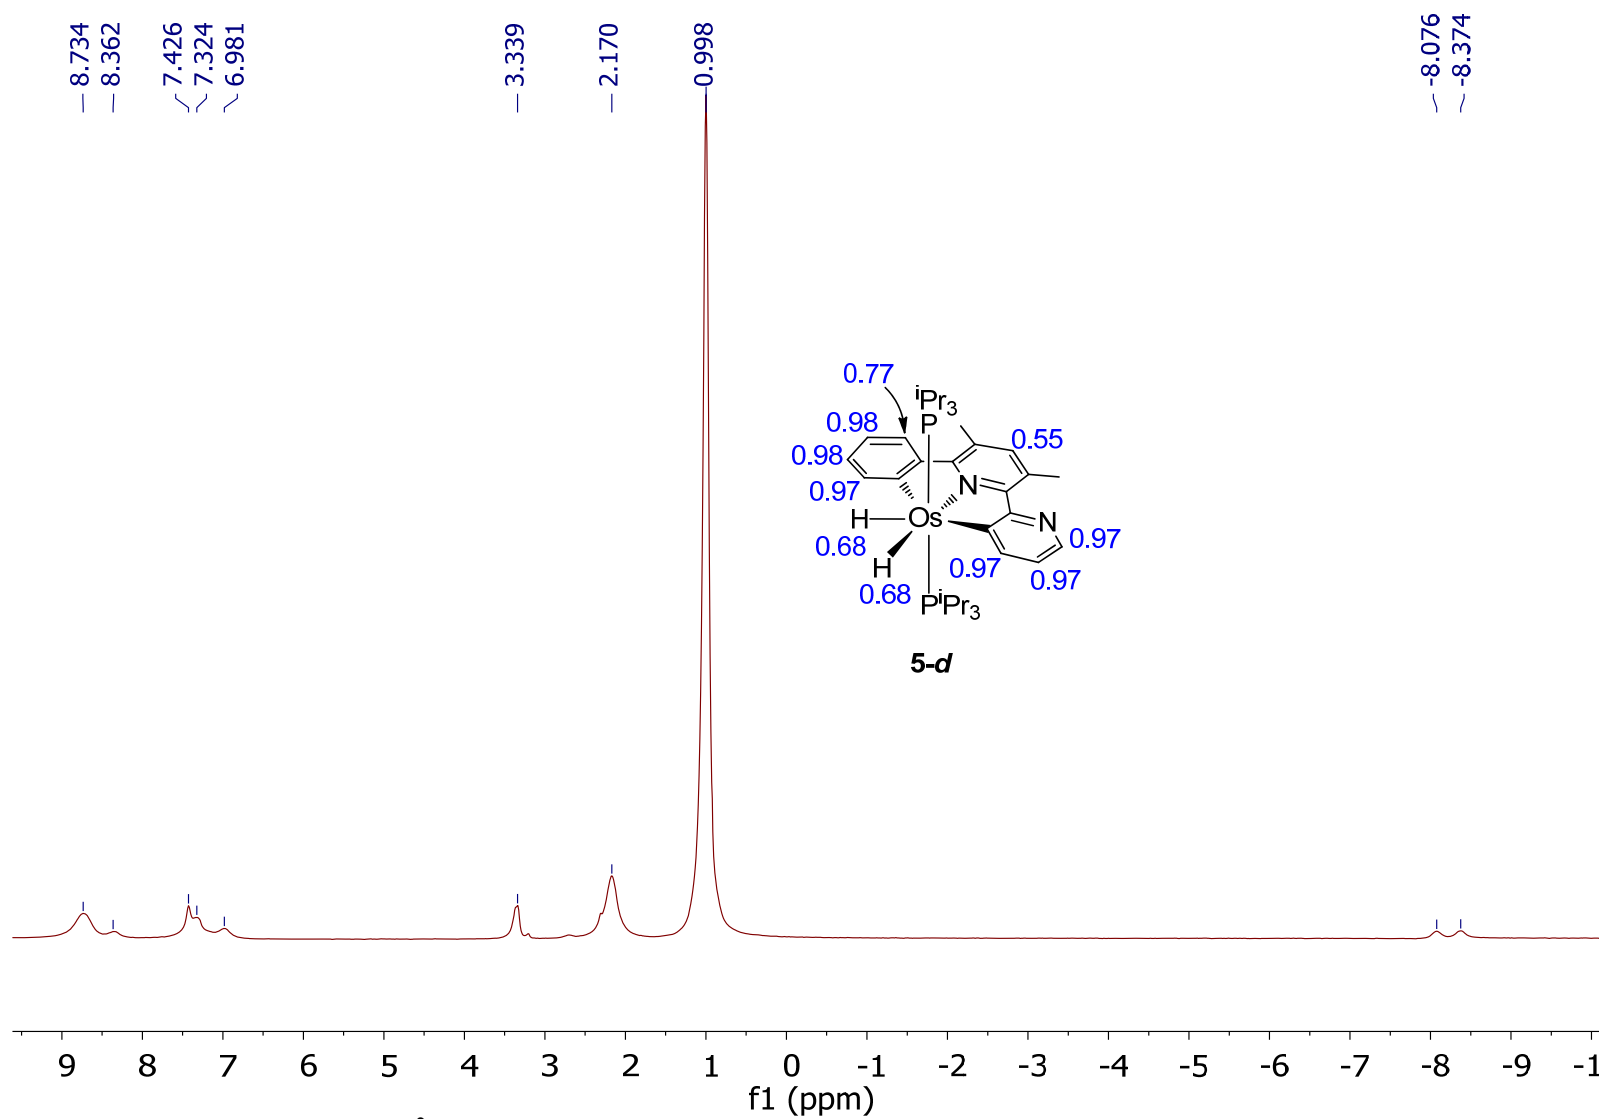

**Figure S52.**  $^2\text{H}$  NMR spectrum (61.42 MHz,  $\text{C}_6\text{H}_6$ , 298 K) of compound **5-d**.

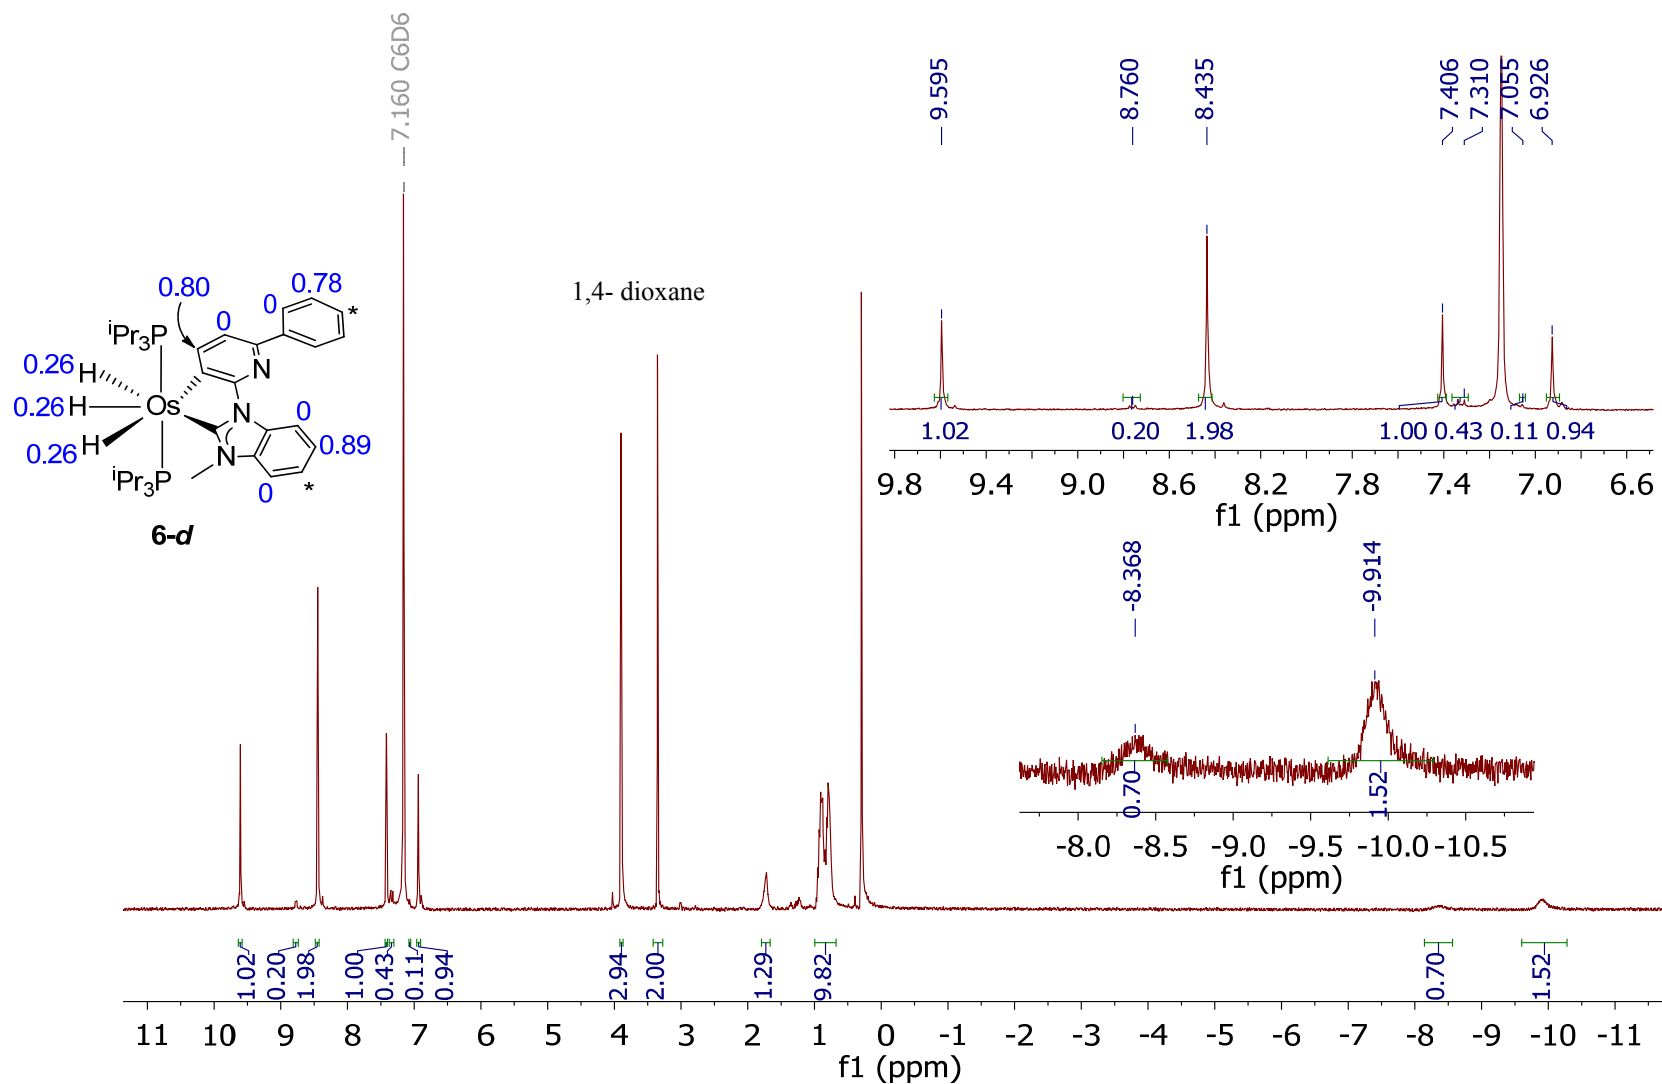

**Figure S53.** <sup>1</sup>H NMR spectrum (300.13 MHz, C<sub>6</sub>D<sub>6</sub>, 298 K) of compound **6-d**. A delay (d1) of 5 seconds was used in order to assure the correct integration of the resonances.

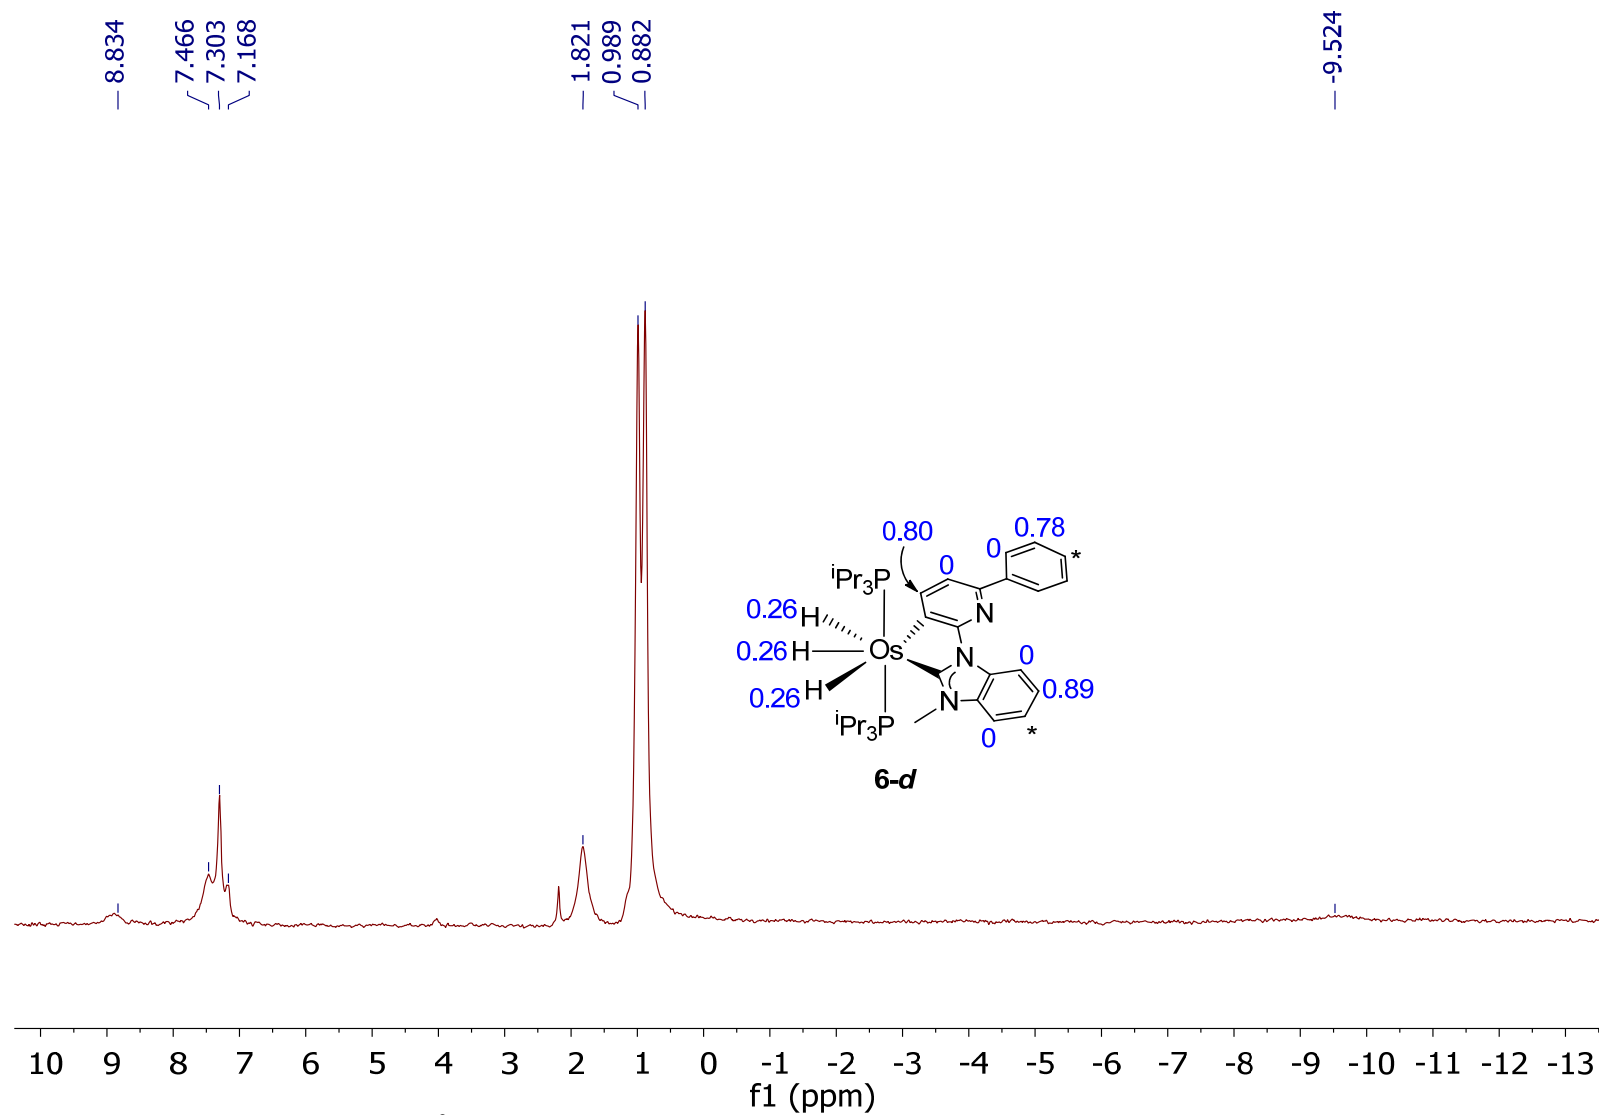

**Figure S54.**  $^2\text{H}$  NMR spectrum (61.42 MHz,  $\text{C}_6\text{H}_6$ , 298 K) of compound **6-d**.

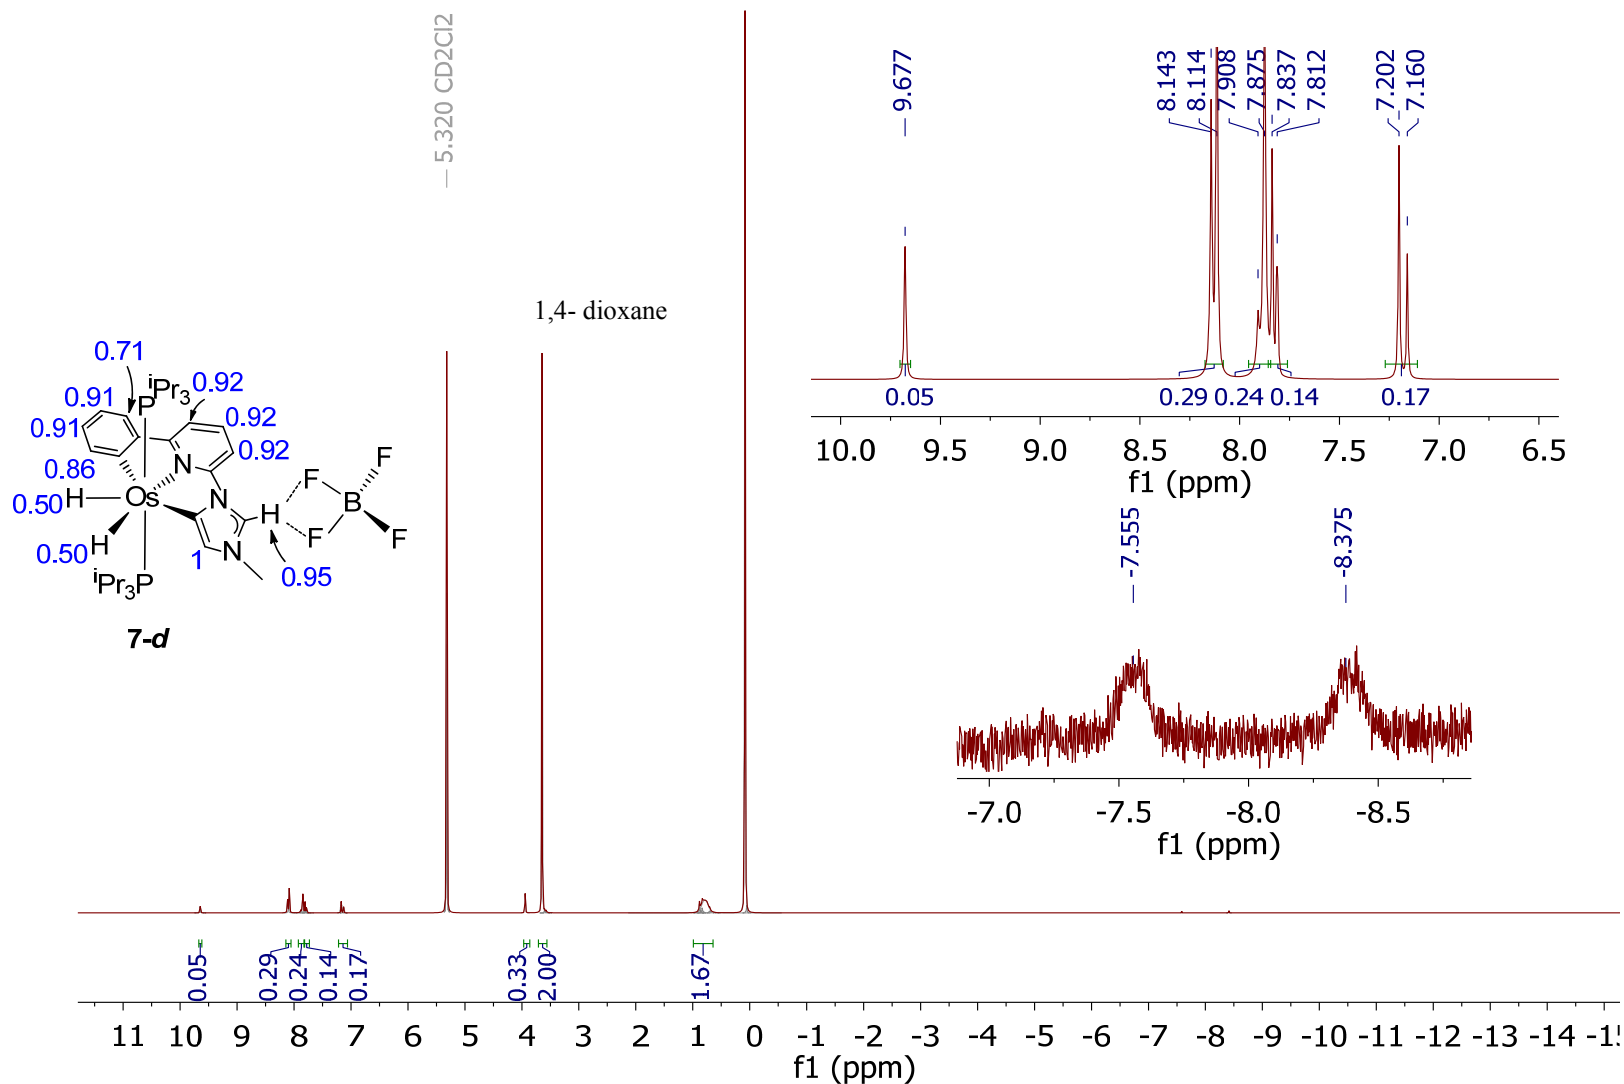

**Figure S55.** <sup>1</sup>H NMR spectrum (300.13 MHz, CD<sub>2</sub>Cl<sub>2</sub>, 298 K) of compound **7-d**. A delay (d1) of 5 seconds was used in order to assure the correct integration of the resonances.

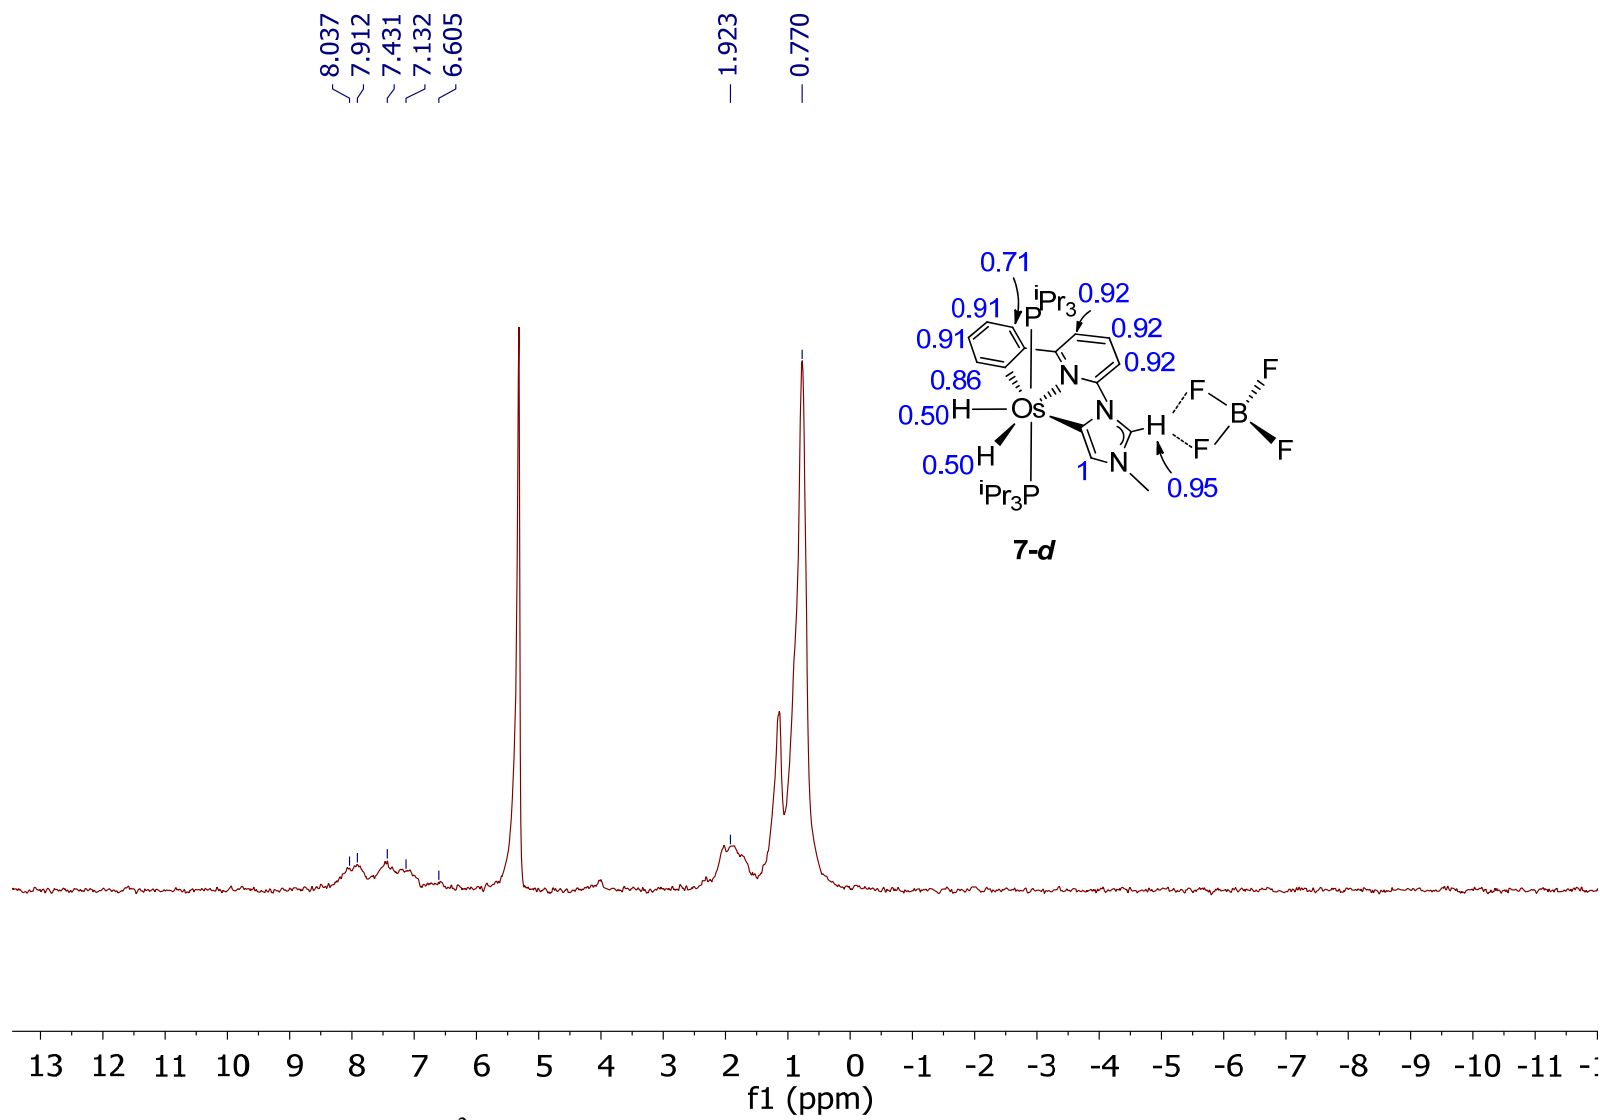

**Figure S56.**  $^2\text{H}$  NMR spectrum (61.42 MHz,  $\text{CH}_2\text{Cl}_2$ , 298 K) of compound **7-d**.

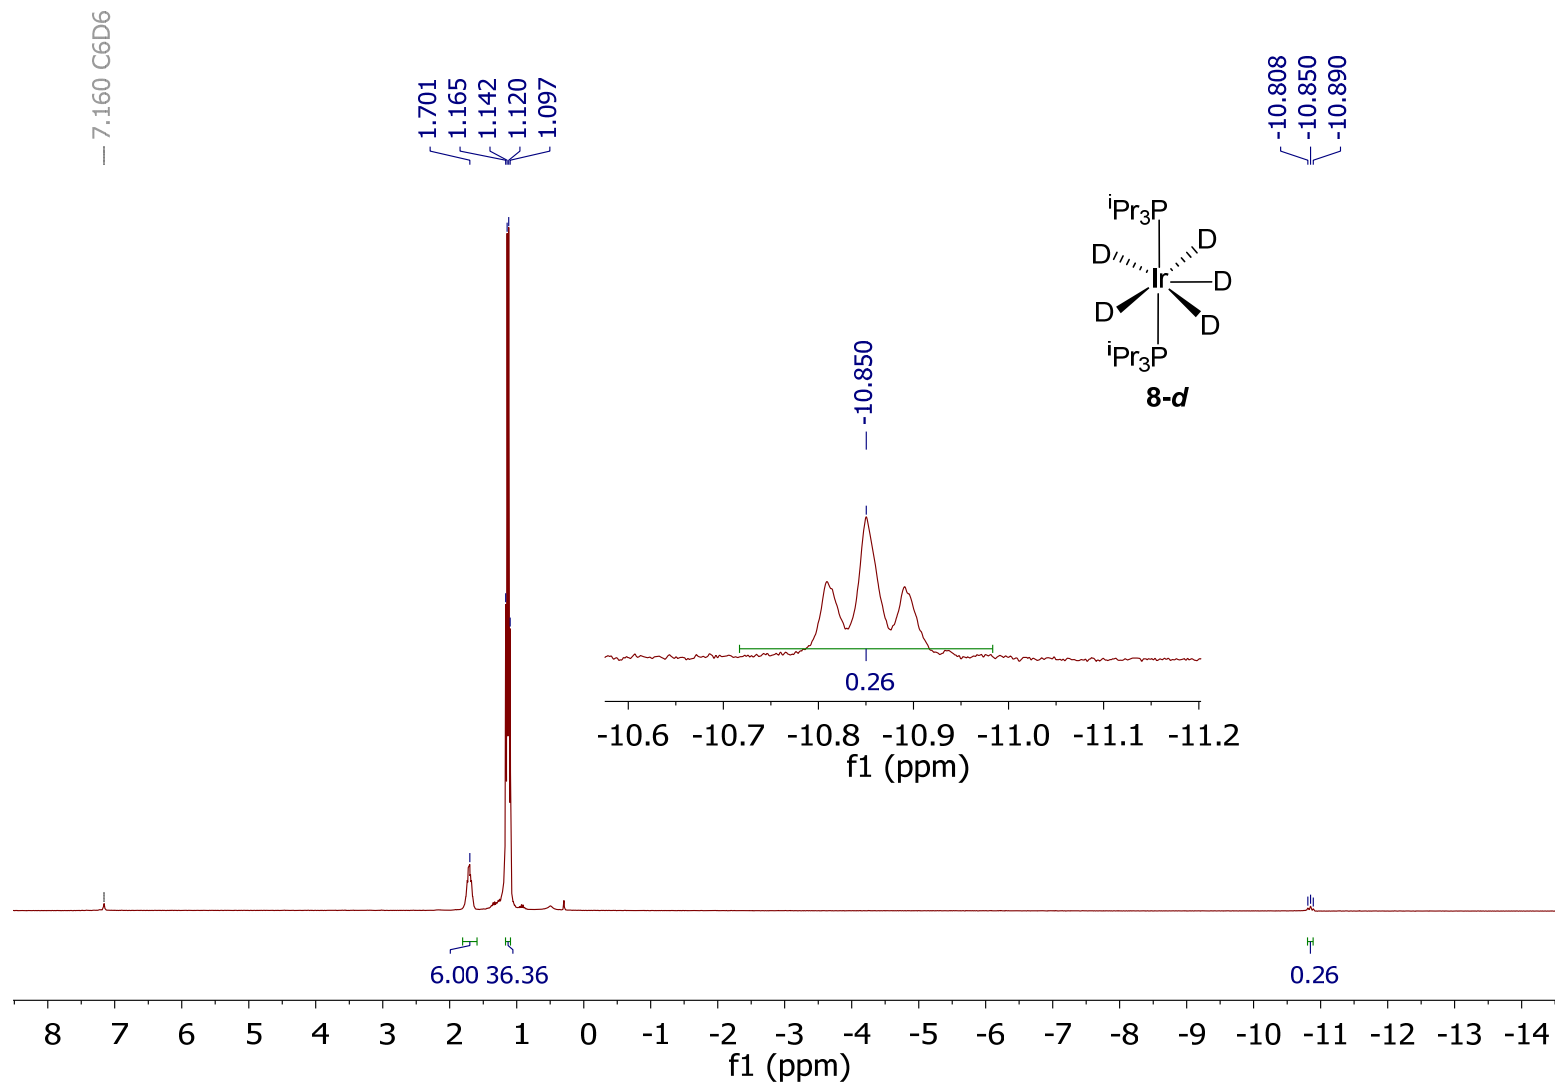

**Figure S57.**  $^1H$  NMR spectrum (300.13 MHz,  $C_6D_6$ , 298 K) of compound **8-d**. A delay (d1) of 5 seconds was used in order to assure the correct integration of the resonances.

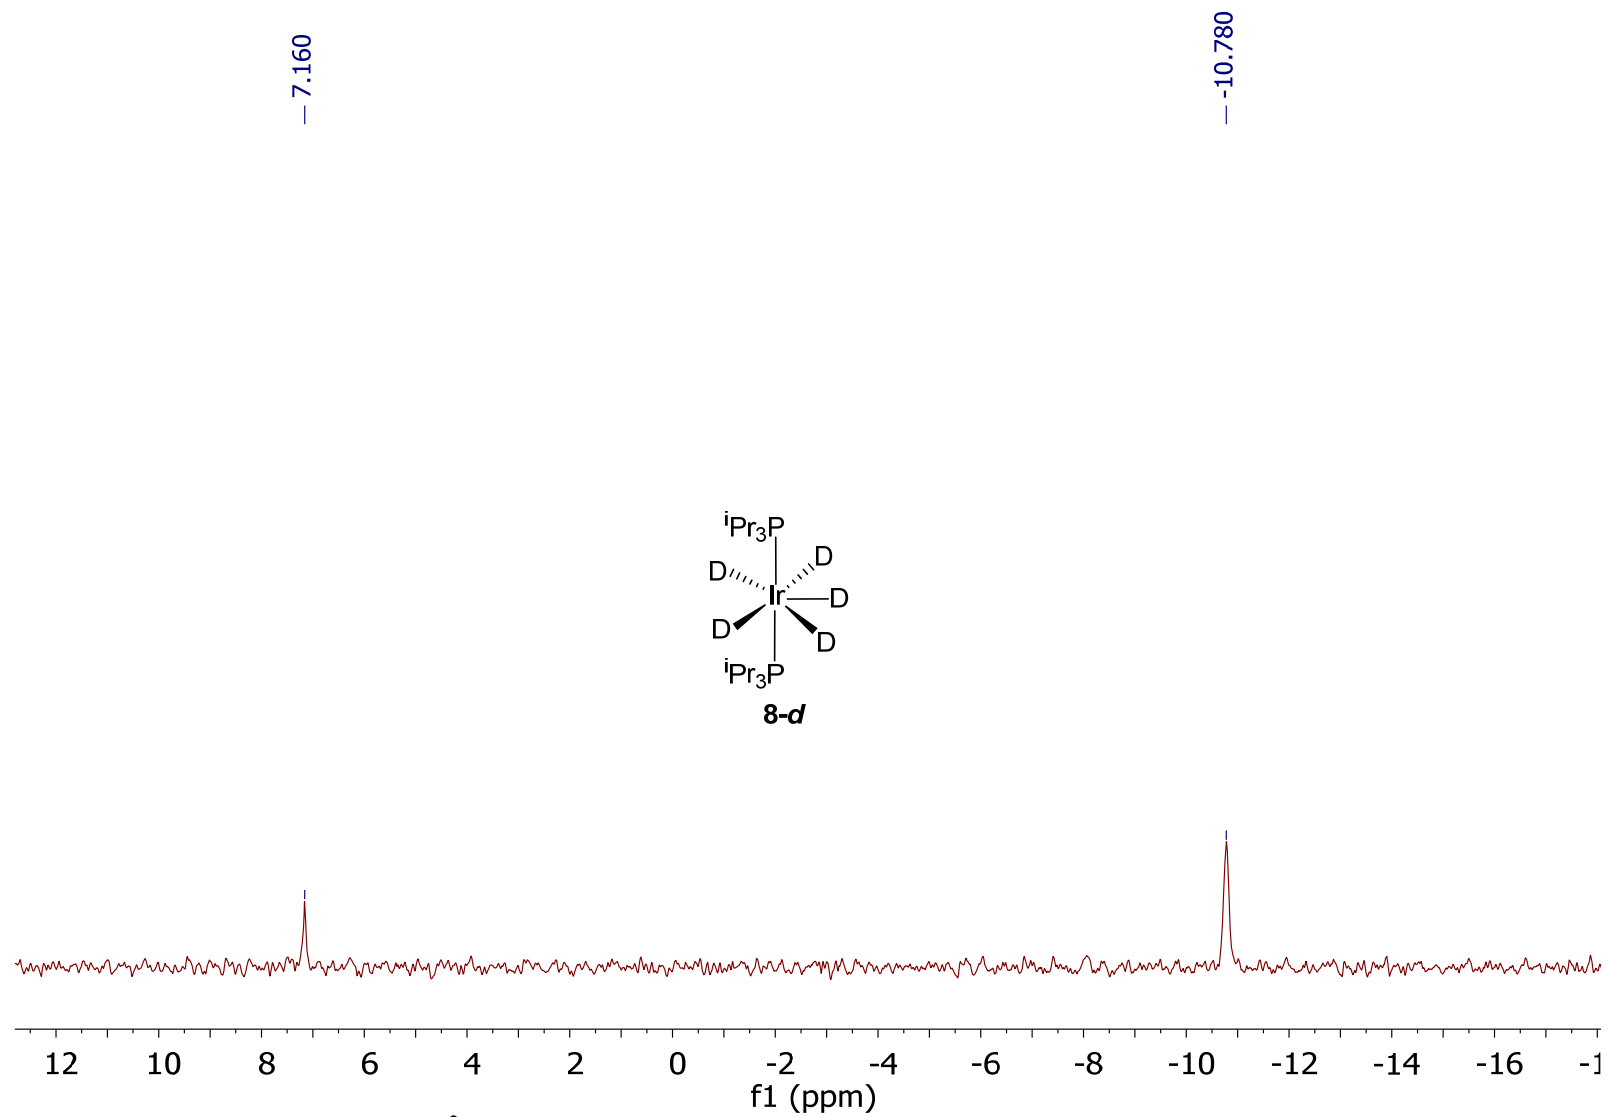

**Figure S58.**  $^2\text{H}$  NMR spectrum (61.42 MHz,  $\text{C}_6\text{H}_6$ , 298 K) of compound **8-d**.

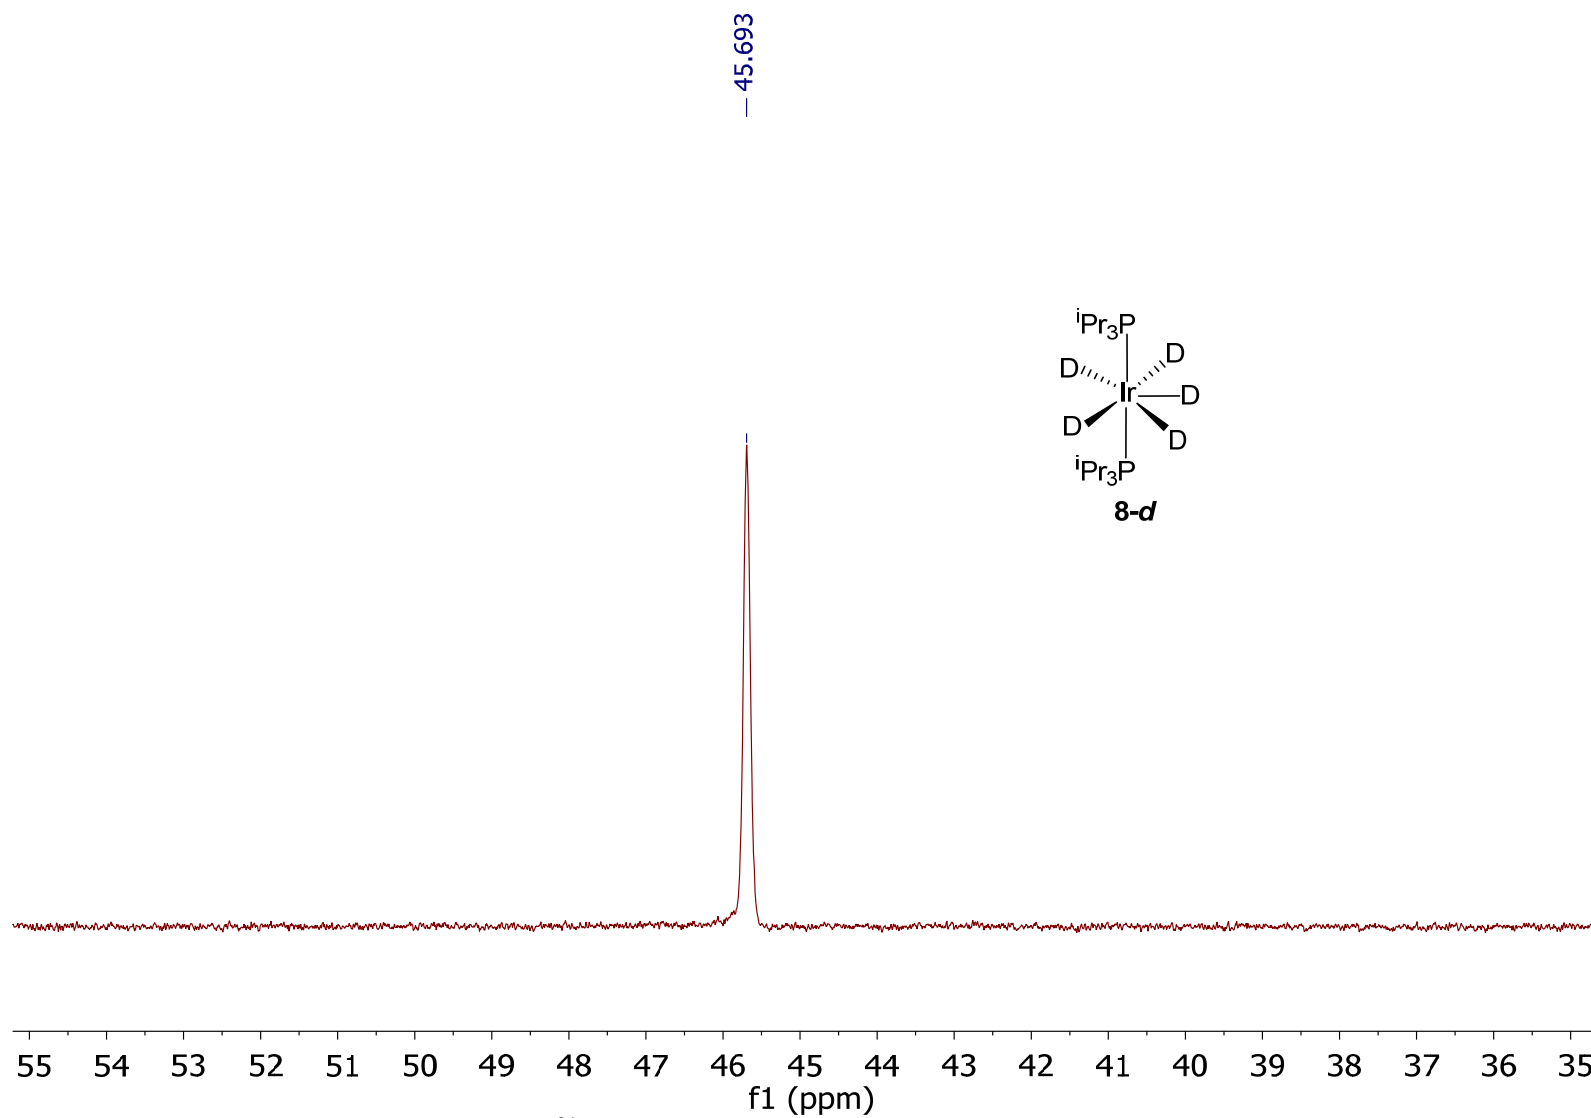

**Figure S59.**  $^{31}\text{P}\{^1\text{H}\}$  NMR spectrum (121.49 Hz,  $\text{C}_6\text{D}_6$ , 298 K) of compound **8-d**.



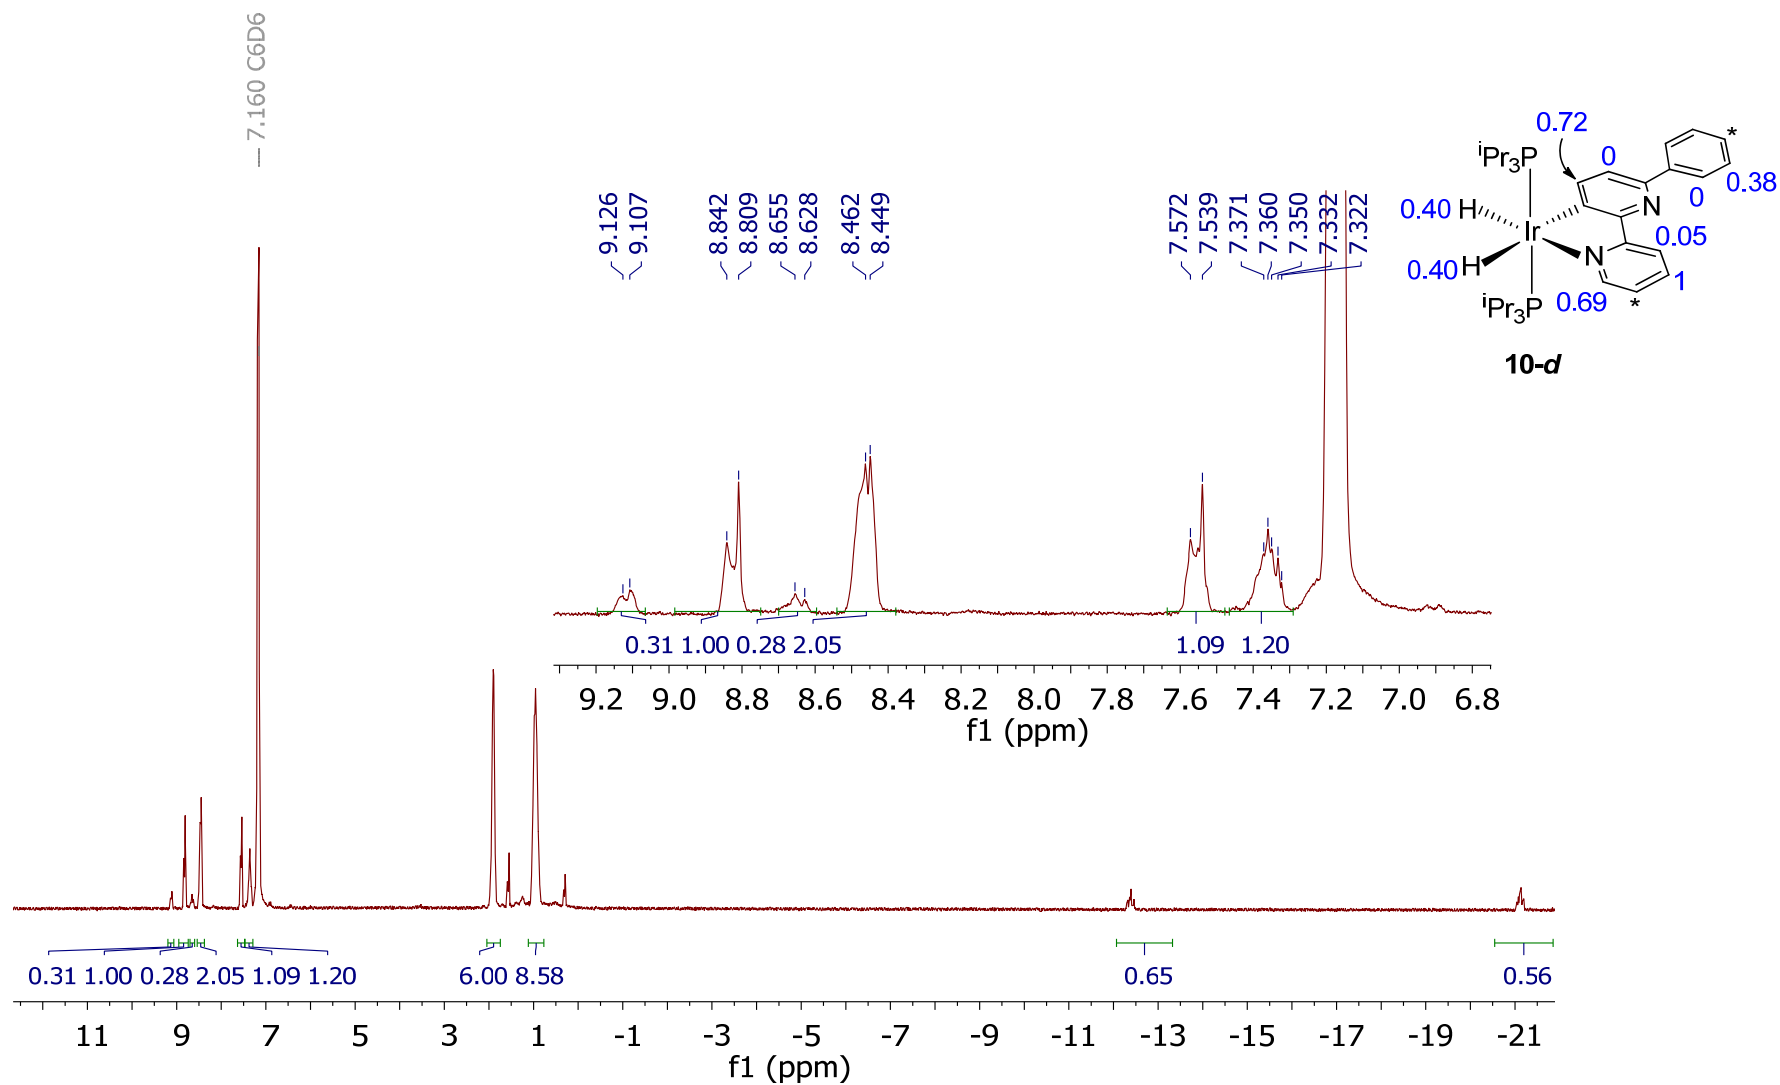

**Figure S60.** <sup>1</sup>H NMR spectrum (300.13 MHz, C<sub>6</sub>D<sub>6</sub>, 298K) of compound **10-d**. A delay (d1) of 5 seconds was used in order to assure the correct integration of the resonances.

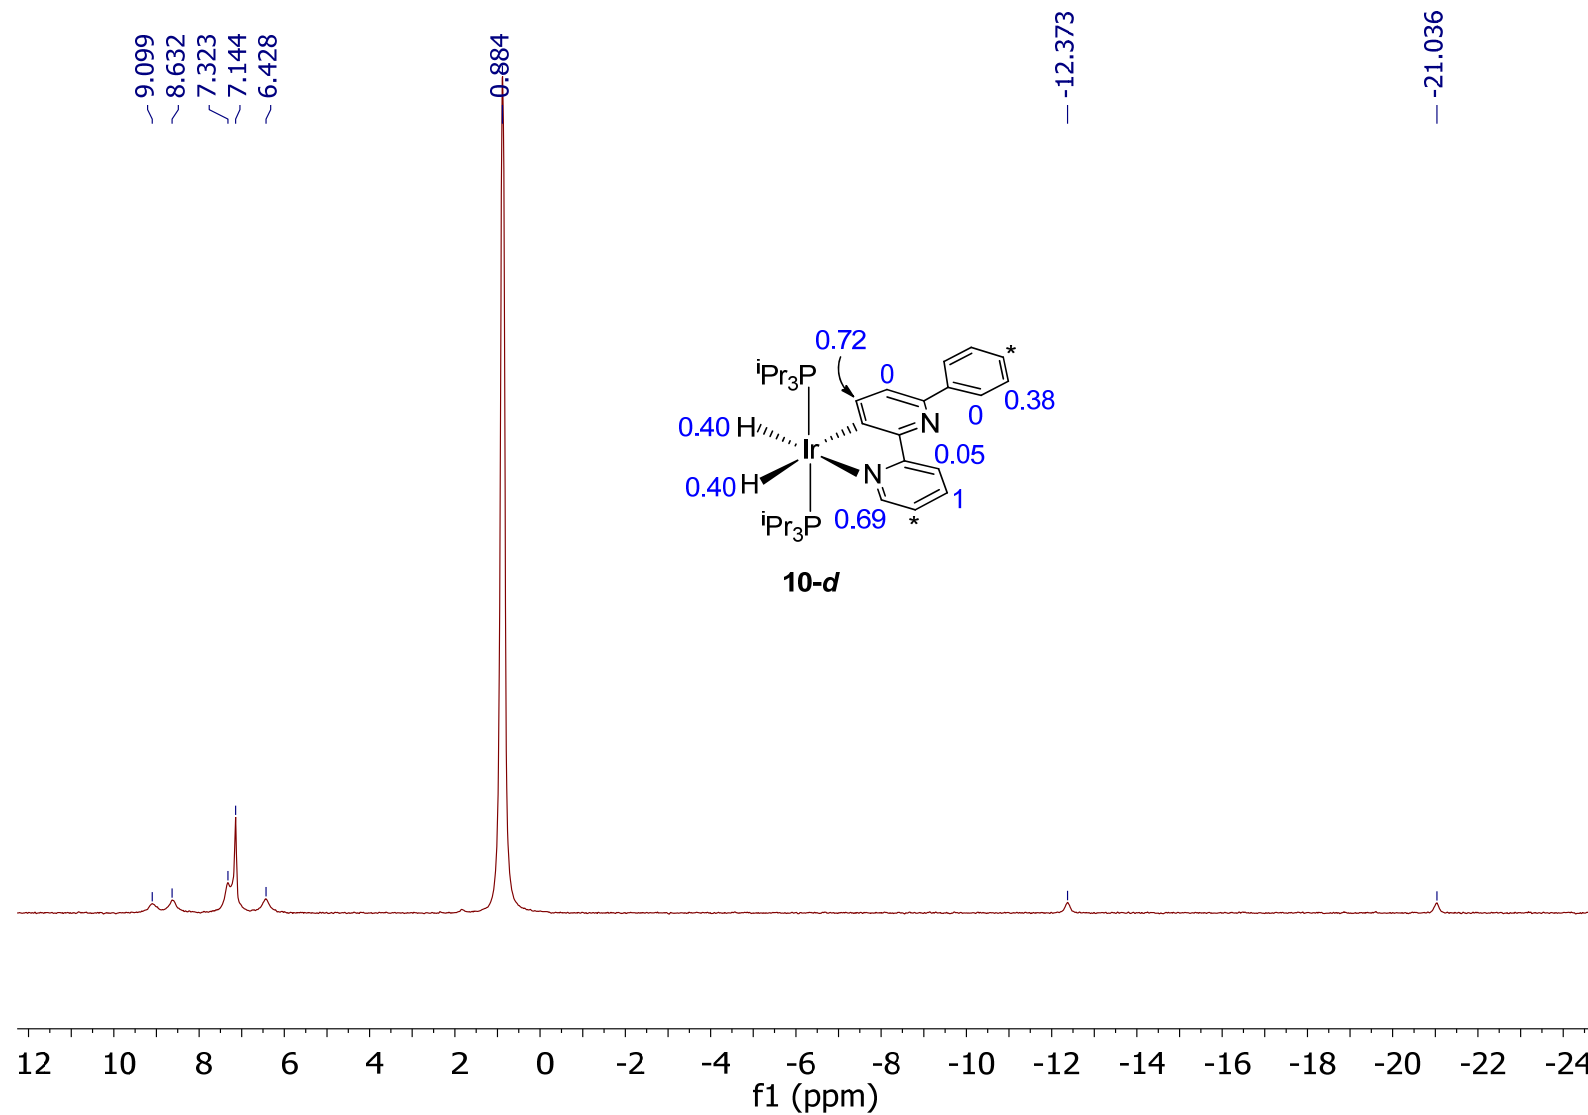

**Figure S61.**  $^2\text{H}$  NMR spectrum (61.42 MHz,  $\text{C}_6\text{H}_6$ , 298 K) of compound **10-d**.

● References

- (1) Aracama, M.; Esteruelas, M. A.; Lahoz, F. J.; Lopez, J. A.; Meyer, U.; A. Oro, L.; Werner, H. Synthesis, Reactivity, Molecular Structure, and Catalytic Activity of the Novel Dichlorodihydridoosmium(IV) Complexes  $\text{OsH}_2\text{Cl}_2(\text{PR}_3)_2$  ( $\text{PR}_3 = \text{P}^i\text{Pr}_3$ ,  $\text{PMe}^t\text{Bu}_2$ ). *Inorg. Chem.* **1991**, *30*, 288-293.
- (2) Werner, H.; Schulz, M.; Esteruelas, M. A.; Oro, L. A.  $\text{IrCl}_2\text{H}(\text{P}^i\text{Pr}_3)_2$  as Catalyst Precursor for the Reduction of Unsaturated Substrates. *J. Organomet. Chem.* **1993**, *445*, 261-265.
- (3) Kauffmann, T.; König, J.; Woltermann, A. Nucleophile Alkylierung und Arylierung des 2,2'-Bipyridyls. *Chem. Ber.* **1976**, *109*, 3964-3868.
- (4) Serrano, E.; Martin, R. Nickel-Catalyzed Reductive Amidation of Unactivated Alkyl Bromides. *Angew. Chem. Int. Ed.* **2016**, *55*, 11207-11211.
- (5) Li, J.; Wang, Z.; Turner, E. Tridentate platinum(II) complexes. US patent 9,203,039 B2, **2015**.
- (6) Blessing, R. H. *Acta Crystallogr.* **1995**, *A51*, 33. SADABS: Area-detector absorption correction; Bruker- AXS, Madison, WI, 1996.
- (7) SHELXL-2016/6. Sheldrick, G. M. *Acta Cryst.* **2008**, *A64*, 112-122.
